# Supplementary material
Source: ML conference proceedings conference paper supplement (https://openreview.net/forum?id=MgXrLxjDed)
Supplement: supplementary_material [file output.xlsx]

## Sheet: Sheet1
high level label	original level label	is it correct
0	5208, 41577, 59458, 12443, 65062, 42860, 37664, 17261, 71880, 10831, 41632, 19307, 3119, 72843, 19420, 62301, 6682, 55057, 47611, 72905, 1112, 49919, 57992, 1984, 20455, 27101, 51076, 8694, 58371, 10685, 6048, 29978, 3009, 12206, 39491, 53453, 8264	yes
1	66496, 2133, 22428, 64313, 45775, 41733, 74199, 16966, 31257, 70725, 38725, 43514, 16232, 54647, 31425, 72054, 19153, 1916, 3171, 64437, 53440, 7389, 22501, 62535, 795, 7949, 48688, 69595, 17907, 31560, 48221, 26173, 62454, 9929, 2068, 44429	yes
2	372, 10121, 27746, 52507, 63808, 14360, 25808, 34267, 51278, 43578, 51144, 57764, 15125, 54467, 62882, 40117, 67346, 45869, 59161, 48114, 14255, 2884, 63724, 3127, 28902, 23548, 65516, 464, 25001, 20070, 69464, 38289, 1390, 4405, 30490, 62929	yes
3	72079, 20707, 32105, 72404, 31756, 23637, 32635, 28850, 14405, 50142, 22576, 30867, 28419, 6296, 11222, 38108, 64601, 60695, 61955, 366, 49259, 67786, 73282, 44050, 30505, 45928, 65497, 68440, 49504, 70797, 20816, 50998, 46387, 61885, 63401, 26853, 37181	no
4	29077, 66544, 11333, 36707, 12806, 74208, 58601, 54638, 61043, 57192, 2770, 1516, 23819, 69419, 40968, 23364, 38563, 74631, 54087, 62819, 68227, 52377, 37873, 66689, 40851, 20429, 27193, 24345, 71834, 46268, 10403, 54774, 66480, 38790, 53098	yes
5	59182, 72442, 3282, 32379, 7289, 52277, 15486, 18665, 21407, 26175, 64597, 13315, 71547, 52938, 26738, 45572, 65725, 48523, 39702, 64943, 41896, 5189, 59989, 63894, 54665, 30788, 38444, 1364, 13391, 45456, 28715, 70661, 35210, 7423, 39352, 69588	yes
6	51420, 35974, 69848, 15071, 69648, 28539, 7801, 39711, 45957, 2063, 60573, 38116, 54578, 48003, 60402, 44101, 16340, 4869, 47523, 50129, 52247, 47356, 11541, 71385, 52990, 32354, 25729, 62031, 22750, 73588, 62482, 69873, 58943, 9869, 3745, 5501, 49057, 60983, 44204, 30866	yes
7	42064, 4212, 36468, 69477, 6703, 59259, 6836, 5017, 25120, 23271, 26461, 39363, 9697, 40867, 35818, 61653, 7715, 44658, 67129, 20653, 42027, 72210, 34332, 71347, 51005, 12105, 11888, 20283, 53761, 18459, 13012, 39022, 54671, 73575, 16324	yes
8	53623, 43905, 65267, 66965, 56803, 2838, 6033, 67634, 45403, 25372, 46584, 23227, 21356, 32588, 19097, 51866, 66383, 46648, 44041, 11328, 40252, 23798, 43003, 36290, 42580, 50153, 28641, 25264, 54873, 43190, 43916, 63241, 74317, 66055, 18655	yes
9	65215, 68075, 14797, 73393, 4927, 5415, 72114, 73765, 26027, 53764, 25753, 882, 45955, 18833, 35908, 72740, 51096, 48123, 38442, 66205, 38935, 51562, 22667, 44056, 33623, 61705, 72585, 40310, 61217, 9773, 45687, 52987, 28861, 49997, 54780	yes
10	33486, 17770, 58773, 69230, 33147, 64936, 20373, 41716, 2793, 22200, 1003, 51052, 60352, 23408, 9484, 68840, 41526, 23666, 24121, 1706, 40217, 17880, 5886, 26762, 30563, 51786, 12060, 55378, 25773, 68547, 23300, 61190, 23683, 6119, 59295, 63425, 34657, 30878, 44053, 9406	yes
11	12108, 74470, 11544, 6558, 54291, 26517, 54682, 10200, 12664, 52833, 64314, 49620, 22550, 26137, 24655, 50464, 33376, 14572, 39350, 25706, 67917, 28418, 40510, 5340, 69370, 1867, 34235, 15420, 67926, 62897, 41193, 63980, 65230, 10336, 41017, 23137, 58367, 64708	yes
12	8023, 41384, 29158, 12175, 58406, 41025, 45636, 67564, 7737, 4775, 70613, 21309, 34444, 43820, 57120, 15058, 10444, 46664, 20224, 30957, 52255, 46265, 43914, 12403, 51159, 55106, 67636, 65754, 74412, 70110, 22175, 43635, 64675, 62933, 3509, 29023, 65262, 32717, 41620, 23236	yes
13	55615, 52982, 72091, 28457, 16956, 40164, 51526, 54822, 70714, 72303, 18454, 68026, 46060, 33053, 62485, 51437, 7659, 58775, 70739, 19226, 64957, 19917, 49043, 70467, 16337, 69748, 39261, 44964, 40096, 21220, 1755, 28988, 40032, 67020, 13912, 18229, 67560, 39563	yes
14	47763, 60069, 66887, 68296, 22337, 36957, 18532, 17543, 33876, 31223, 68045, 69379, 49054, 17293, 51951, 48402, 60755, 4178, 18209, 20556, 17458, 43238, 11812, 15480, 20992, 39699, 26979, 59219, 42721, 74404, 22342, 65848, 69549, 17226, 30471	yes
15	10798, 59214, 50115, 59486, 43591, 33280, 22942, 22350, 19883, 12231, 5047, 37846, 72688, 41369, 12414, 24873, 44504, 43406, 73101, 34721, 17046, 45598, 61898, 25733, 8214, 35178, 43131, 54, 44258, 65393, 27464, 39500, 29525, 49145, 4108	yes
16	71553, 72318, 74524, 36867, 18845, 49851, 59048, 12407, 40749, 62212, 47554, 51431, 10008, 70682, 49970, 70114, 73952, 15041, 16201, 36843, 4640, 22129, 1702, 20354, 29847, 50450, 28199, 13063, 52856, 19604, 20577, 12277, 16563, 42773, 7088, 66276, 63191	yes
17	16393, 19733, 28655, 54910, 13475, 51935, 57287, 70420, 71913, 4438, 65006, 35556, 41825, 53763, 56922, 62198, 69374, 55402, 15811, 590, 10272, 6940, 72782, 14465, 66658, 43364, 34005, 68659, 34767, 45317, 46427, 4610, 56285, 58911, 26475, 68463, 45604, 41428	yes
18	48554, 55789, 41107, 64269, 33488, 19600, 22355, 7721, 38530, 59723, 6143, 48262, 52235, 55349, 72309, 48217, 10862, 19711, 70947, 16453, 6321, 44732, 34425, 55361, 56977, 53565, 55191, 53486, 24107, 64338, 49018, 13998, 68269, 2169, 29446, 64154, 46857	yes
19	18872, 35836, 54807, 13696, 33169, 37988, 41342, 8537, 34702, 45655, 10519, 15109, 55142, 73198, 31538, 10481, 53139, 5449, 9884, 30872, 15889, 69839, 1559, 46738, 23030, 43683, 29597, 65093, 1650, 38843, 49591, 52057, 15768, 12483, 12614	yes
20	41337, 49556, 8173, 63622, 63662, 25166, 68501, 66364, 46520, 64232, 30245, 63856, 28472, 49162, 45947, 70269, 8750, 54474, 63611, 22391, 9053, 14159, 7885, 45902, 36781, 37802, 46383, 8408, 67643, 49243, 10009, 20643, 47121, 12317, 43027, 50042, 41941, 9885, 58186	yes
21	74059, 44233, 32118, 16249, 25604, 23317, 62252, 54584, 57382, 45179, 27684, 40343, 65419, 48089, 33661, 70058, 16963, 63134, 68813, 15652, 57823, 45185, 64498, 23671, 2158, 50081, 1155, 45406, 56051, 32344, 60655, 7449, 27148, 41864, 22548	yes
22	52300, 29085, 60841, 42746, 68469, 71439, 32618, 40696, 31066, 69008, 23647, 40296, 10025, 74274, 13922, 19821, 16530, 16861, 37929, 18754, 71589, 52134, 71686, 2076, 43225, 39775, 56115, 34358, 18208, 2936, 39394, 58760, 33629, 9474, 35241, 32324	yes
23	34925, 62387, 18473, 58293, 7896, 16842, 56706, 45253, 42051, 36759, 65853, 56198, 13583, 17787, 39738, 51543, 24928, 57355, 68695, 29677, 43832, 53221, 73458, 35581, 25160, 18615, 57807, 17874, 38980, 22963, 9526, 50061, 15142, 44579, 13130, 64346, 45165	yes
24	38264, 57182, 7916, 35592, 51842, 47199, 35125, 24412, 200, 43049, 43920, 47977, 48313, 43600, 18901, 30012, 54332, 50122, 38803, 39409, 42621, 40451, 11448, 1649, 47770, 39287, 14436, 49631, 32738, 16907, 10205, 12420, 30986, 55573, 38771, 30826, 42852	yes
25	29159, 42078, 41556, 62411, 55578, 61273, 36625, 56480, 5072, 7570, 35831, 470, 60175, 7702, 44738, 38382, 67567, 8346, 72893, 35494, 16344, 42483, 63999, 71511, 42565, 22624, 37183, 21342, 27444, 60498, 65255, 42701, 39254, 63501, 9013, 18073, 62149, 73419, 26811	yes
26	68325, 4296, 26365, 59669, 39404, 44036, 45930, 29054, 5039, 181, 44512, 3905, 21511, 24892, 16069, 22536, 20706, 29469, 74447, 25721, 53557, 36155, 20221, 46859, 54131, 5691, 12905, 72202, 32551, 26628, 54485, 70477, 56135, 35576, 55239, 23898	yes
27	38122, 62731, 72108, 824, 16017, 20300, 51477, 52867, 27022, 69364, 34863, 4168, 28174, 25463, 9029, 45480, 64323, 66934, 66953, 73337, 34346, 8499, 50876, 25935, 24636, 1806, 57913, 68784, 46324, 20986, 57738, 45282, 24273, 74503, 51210, 71104, 70349, 55220, 32229	yes
28	44884, 58323, 58092, 46151, 70491, 61811, 2816, 13757, 24048, 37460, 46922, 70040, 34647, 20920, 15124, 69765, 10330, 25758, 13306, 69430, 11151, 3786, 42047, 22026, 47296, 44325, 67416, 57707, 32733, 33763, 37645, 62174, 17812, 44454, 33042	yes
29	59872, 63557, 1659, 24186, 69630, 4380, 61148, 33485, 28050, 43223, 53934, 7390, 47653, 23933, 50585, 27760, 53404, 62233, 16600, 64280, 61581, 55680, 34621, 24541, 25326, 10591, 19923, 50664, 39479, 26082, 53041, 65648, 38905, 11158, 44715	yes
30	20061, 44477, 33734, 13421, 19791, 44020, 5040, 50488, 18774, 52123, 47835, 11160, 9054, 59049, 41284, 27024, 45656, 32682, 52742, 47073, 61395, 32192, 72972, 12429, 18548, 63709, 57699, 23028, 55337, 63573, 9523, 65396, 68566, 50109, 3110, 4088, 69698	yes
31	59744, 50030, 30213, 66097, 27923, 48546, 38149, 49792, 65603, 12654, 61476, 15036, 16947, 29903, 1400, 6387, 55738, 19312, 32964, 49257, 31136, 15404, 20844, 7401, 14510, 59664, 65181, 19595, 9763, 46902, 46198, 61309, 68594, 3572, 40883, 29041, 11089, 12896, 64892, 46395	yes
32	49405, 2142, 31158, 67686, 31814, 58722, 39803, 56002, 23800, 44594, 27185, 21711, 24253, 19200, 34862, 70002, 53104, 72088, 8046, 6686, 71996, 3294, 22812, 52704, 3990, 72330, 55519, 12620, 58907, 770, 7832, 37961, 60995, 60884, 38990, 43715, 16737, 36754, 20681, 61421	yes
33	26091, 20311, 49649, 27433, 52682, 11837, 35438, 37543, 17073, 49915, 57135, 42133, 29166, 759, 13065, 35334, 72051, 64468, 45646, 10053, 17495, 24934, 65777, 46556, 22487, 49374, 36948, 32147, 45408, 48885, 59517, 24773, 31629, 70265, 31683, 28855, 9486	yes
34	25438, 53699, 25794, 36358, 45225, 31603, 42786, 14200, 69191, 10296, 73460, 60, 12331, 28887, 57100, 1083, 10129, 29839, 32253, 68845, 61293, 42731, 30129, 14941, 27990, 44307, 20038, 25216, 36319, 63115, 2785, 28151, 11652, 41307, 19035, 34802, 52619	yes
35	25950, 18820, 59430, 52459, 47026, 50175, 44461, 36603, 71531, 10572, 19353, 53730, 26883, 11473, 48881, 40830, 7487, 58500, 23118, 60038, 8715, 5051, 24057, 9096, 27650, 12726, 17213, 17229, 34051, 23607, 13688, 10156, 33878, 53604, 1023, 72705, 36835, 39577, 65298	yes
36	37164, 58501, 16844, 61914, 66577, 53779, 26959, 7016, 51540, 5469, 54518, 22445, 73182, 69222, 26434, 67278, 9559, 52710, 37054, 11536, 36108, 15033, 45397, 62317, 33606, 24587, 40541, 17120, 5858, 33043, 54630, 63718, 40282, 21578, 31445, 53866, 18220, 58750	yes
37	36569, 39415, 53957, 45222, 27348, 16120, 41174, 10665, 415, 35399, 62111, 49515, 14982, 12221, 54915, 51903, 38311, 57434, 73230, 5687, 47893, 25885, 28794, 73266, 21929, 48475, 60314, 58592, 22729, 26520, 24073, 19541, 39063, 19229, 36568, 44613, 51532, 66639, 72829, 18803	yes
38	30900, 36326, 49916, 54927, 29610, 8827, 36966, 32902, 9675, 31530, 38064, 38791, 45850, 61676, 14382, 5134, 56342, 28053, 28148, 8888, 27009, 5013, 8674, 18719, 27172, 5305, 37004, 23184, 66129, 49847, 11385, 49610, 51810, 8477, 3311, 73848, 55326, 401, 36208	yes
39	44538, 45377, 15491, 16490, 41474, 19009, 37996, 51289, 29628, 50503, 23140, 16422, 19079, 5752, 22117, 14714, 22646, 11744, 67107, 55786, 21193, 2848, 22384, 1503, 41565, 71234, 69538, 65855, 60595, 71817, 6384, 46531, 43403, 35798, 62538, 57602, 9721, 43540, 67363	yes
40	3340, 37147, 52806, 8033, 21845, 28644, 7020, 35966, 28998, 62427, 59959, 11639, 39370, 44468, 30085, 68094, 53168, 39165, 36491, 70934, 70375, 43557, 29561, 40865, 2649, 20425, 21763, 1599, 40142, 2749, 54934, 38888, 43141, 39902, 56097, 22525, 72804, 25395	yes
41	33080, 34459, 29084, 9431, 41471, 41295, 42297, 9284, 7673, 8200, 22371, 3, 33295, 39216, 65470, 41653, 43353, 43483, 60597, 24006, 1301, 7422, 23079, 31316, 3607, 29993, 37352, 42581, 46729, 26323, 50740, 71330, 67037, 38957, 15234, 16636, 58755, 20751, 23526	yes
42	50600, 19704, 67024, 70452, 45992, 55144, 34168, 61450, 37442, 26037, 1884, 69015, 40643, 33704, 73387, 53717, 29083, 28158, 53279, 36400, 71970, 73125, 36249, 9692, 52641, 42833, 40425, 9084, 22734, 71131, 34965, 22706, 9125, 58672, 38019, 53449	yes
43	62993, 25441, 39990, 36181, 61675, 57465, 54221, 40610, 3858, 57414, 52705, 24901, 44827, 55131, 51587, 51646, 22630, 27919, 53298, 30237, 24860, 64577, 15193, 35519, 42357, 13071, 51753, 42188, 23740, 71823, 35919, 47474, 11285, 53220, 64306, 64315, 4800, 63711, 5112	yes
44	35755, 64444, 34589, 33702, 21131, 66521, 65253, 9374, 39321, 28627, 50628, 56370, 67112, 22808, 17402, 56452, 6467, 47368, 68255, 38225, 57937, 60513, 20306, 34852, 63884, 52879, 72191, 35052, 74169, 20606, 29781, 44835, 8654, 56143, 23210, 25744, 48356, 37201	yes
45	48078, 8309, 56294, 30382, 65729, 28359, 1925, 13948, 70416, 35440, 42505, 22231, 38857, 43007, 31736, 43972, 56236, 22694, 14632, 8222, 49990, 12477, 822, 18862, 14794, 3237, 17549, 16580, 26551, 25831, 42996, 62593, 45399, 67991, 34522, 32451, 58564, 34075	yes
46	1207, 25087, 63744, 1191, 41729, 65073, 58733, 43385, 68824, 59737, 48135, 73970, 67769, 50063, 982, 4549, 43166, 54012, 45488, 59174, 57246, 31292, 17759, 36246, 25265, 22790, 51470, 5709, 16391, 73544, 53862, 67075, 8169, 18980, 35154, 33883, 68543, 64771	yes
47	40489, 44251, 52950, 9274, 30204, 60153, 60886, 15610, 27071, 31997, 23284, 56295, 25442, 6663, 72390, 50596, 41235, 53597, 46009, 16786, 39297, 71359, 14248, 19973, 36562, 18919, 12034, 15485, 55750, 34662, 30530, 66166, 25181, 21021, 58103, 18110, 71415, 28203, 20973, 1198	yes
48	41810, 28092, 71152, 56411, 13073, 55395, 58669, 25568, 47363, 69741, 33275, 11309, 19931, 1066, 40223, 57126, 23336, 16738, 22553, 63704, 70857, 33127, 22161, 66485, 66108, 62507, 15181, 11016, 45275, 68020, 21753, 44789, 23948, 37321, 13081, 26929, 66359, 65216, 13874	yes
49	37251, 10564, 60056, 56112, 64212, 71112, 40288, 13447, 52696, 21063, 15292, 66115, 22469, 10197, 34583, 44162, 45141, 34516, 10282, 54557, 45187, 32988, 7583, 9393, 54811, 6826, 16833, 59830, 13254, 15753, 840, 62612, 43499, 56239, 71723, 13778, 67616, 54207	yes
50	49138, 13639, 1410, 42347, 73014, 12761, 503, 4990, 16259, 20349, 14539, 45853, 69217, 281, 34577, 4094, 35928, 38477, 19341, 6838, 17593, 48832, 36810, 34857, 10419, 43484, 72794, 46926, 1991, 997, 50199, 12329, 14268, 39002, 54936, 67199, 46594	yes
51	59305, 14245, 58424, 7791, 37408, 55127, 5701, 65360, 36456, 71360, 52320, 66292, 56092, 21893, 33602, 55137, 27353, 57892, 17532, 44143, 4875, 14293, 45546, 57644, 19427, 40293, 65473, 2123, 53205, 52142, 45150, 28518, 25975, 49040, 41818, 53791, 10955, 55661, 23622, 65644	yes
52	33534, 73659, 48879, 14003, 42869, 65049, 70413, 9026, 68362, 71938, 19934, 46129, 58482, 24938, 39472, 25080, 61446, 16276, 56810, 46605, 20448, 51752, 60489, 70669, 51577, 32059, 38202, 47040, 6125, 37020, 47917, 40826, 35596, 20056, 72495, 66252, 43434, 61292, 26111	yes
53	2353, 71766, 74333, 5996, 16574, 36982, 22513, 6202, 30088, 46235, 47584, 22132, 17139, 38503, 52758, 40490, 7349, 68106, 8382, 64919, 13431, 38706, 64241, 61620, 33158, 17775, 10844, 36760, 28533, 22580, 73177, 6547, 29876, 11366, 4541, 3972, 40933, 72902	yes
54	9894, 11274, 72823, 47508, 61347, 13910, 26358, 34598, 33154, 16450, 2201, 47926, 10358, 17138, 52131, 29441, 858, 25422, 37469, 48875, 66499, 9299, 6133, 70962, 63977, 67507, 55533, 49865, 8612, 57742, 55235, 72788, 47761, 14133, 40453, 13556, 51742, 832, 3546	yes
55	19001, 14107, 66700, 15241, 68178, 37760, 20173, 8115, 55991, 2612, 63838, 60823, 22146, 5524, 59069, 27840, 16202, 17183, 63145, 54639, 62829, 38820, 60854, 35717, 20159, 34555, 16826, 54350, 65872, 34369, 48234, 37831, 36283, 57351, 12835, 41169, 66503, 29299, 46266	yes
56	37646, 7407, 53839, 31594, 66893, 20985, 7800, 26588, 47912, 34194, 45358, 36946, 32438, 32559, 12805, 61451, 17516, 50646, 10076, 66234, 62537, 28485, 53382, 13914, 66792, 54782, 12382, 3603, 44877, 43497, 8252, 22845, 64681, 23268, 7694, 59369, 23416	yes
57	756, 55939, 46182, 52944, 74634, 11457, 56106, 12250, 51442, 16731, 21323, 14680, 45556, 11828, 41516, 41972, 16094, 42366, 20779, 68323, 35503, 4820, 29984, 20958, 57309, 56146, 29318, 55095, 11647, 65110, 1767, 55138, 47998, 70863, 47238, 23397, 72009	yes
58	66497, 21607, 33926, 47289, 68878, 58732, 61274, 35948, 49397, 7411, 46541, 69653, 66607, 32441, 60000, 60474, 11978, 36391, 60601, 30699, 51004, 61058, 39531, 43657, 36909, 906, 31547, 39014, 43583, 32383, 39824, 22019, 65258, 56054, 59098, 43870	yes
59	63624, 71998, 15830, 10664, 40134, 14288, 72386, 73482, 29294, 7455, 3724, 71288, 30331, 28667, 47985, 28512, 25159, 11499, 64808, 15089, 24080, 51978, 2765, 29655, 33465, 7682, 61978, 30839, 54159, 26104, 56273, 43212, 33336, 8320, 65408, 49027	yes
60	26039, 5113, 43983, 53894, 70275, 35665, 12592, 73071, 51924, 69691, 21773, 39806, 61114, 42443, 19827, 48141, 59806, 45327, 30286, 59731, 11928, 28084, 30364, 7283, 21346, 58460, 29858, 70497, 46131, 31857, 8915, 26760, 9087, 53444, 27909, 30451, 31298	yes
61	56639, 8572, 21085, 23945, 47215, 8172, 11987, 70100, 56929, 26384, 53772, 50029, 9874, 72674, 47104, 64367, 49871, 56678, 24951, 32885, 50165, 64404, 5627, 53494, 1897, 60383, 30502, 9596, 22198, 71570, 38232, 12514, 12066, 56740, 30027, 23399, 60098, 39003, 39311, 60774	yes
62	40030, 35997, 17237, 40031, 55744, 33519, 53294, 5820, 61279, 33641, 39231, 45436, 36599, 19965, 28013, 3530, 48120, 17428, 37539, 40923, 67377, 2839, 26896, 61731, 56177, 52008, 65949, 24722, 18111, 59851, 53443, 8405, 52381, 62270, 39331, 61684, 38492	yes
63	4461, 68775, 801, 23908, 33444, 53731, 35451, 68067, 21595, 31162, 16030, 8209, 19493, 2550, 62525, 45834, 13136, 59828, 21825, 52851, 68064, 9000, 23507, 22658, 69009, 18829, 31745, 49758, 74335, 24251, 6694, 8425, 63074, 52830, 38188, 47728	yes
64	48276, 44748, 55720, 46586, 26155, 37576, 2545, 41860, 66327, 29996, 35158, 57821, 35036, 29106, 68009, 14975, 66372, 14606, 24859, 20249, 69272, 345, 12801, 73989, 204, 18256, 69389, 41914, 2874, 25866, 35463, 69250, 48608, 13318, 36951, 9239	yes
65	26543, 27907, 37976, 4941, 4407, 64757, 26171, 47140, 69039, 2854, 72403, 5618, 66034, 43756, 18705, 16412, 64865, 73713, 29264, 63231, 69897, 49479, 42587, 54354, 58993, 74125, 29250, 59760, 71633, 32632, 56251, 65009, 60965, 16096, 39073	yes
66	8818, 39330, 24695, 60049, 30865, 36180, 37428, 57598, 62861, 64173, 39785, 19075, 34956, 49148, 5510, 36632, 38001, 4439, 53375, 41883, 23500, 47539, 61123, 16027, 51427, 36086, 12282, 18972, 40530, 19301, 36252, 45158, 62938, 12499, 26183, 47432	yes
67	51256, 13083, 34210, 4861, 23438, 10669, 24221, 49, 68247, 33775, 42944, 40850, 22331, 70286, 73397, 73771, 3909, 5910, 1006, 21681, 7844, 53487, 9385, 39209, 11627, 49539, 33562, 71523, 21986, 17021, 11207, 2980, 38550, 20730, 69539, 49226, 258	yes
68	54788, 13335, 62501, 28618, 51511, 44366, 65121, 7742, 67240, 73264, 49654, 31259, 48269, 33065, 7958, 14663, 36308, 67574, 71416, 11511, 44743, 25295, 50144, 64085, 69760, 29618, 40876, 62606, 73050, 55379, 66427, 20679, 6692, 17851, 45501, 20366, 33563, 65137, 9841	yes
69	25318, 23051, 74086, 3997, 33454, 25996, 51350, 20235, 18142, 17579, 7222, 61736, 45718, 217, 71951, 51642, 794, 25538, 11980, 59104, 51403, 35506, 3383, 68518, 68706, 60132, 46003, 16670, 21410, 32776, 49963, 28714, 44932, 15576, 26284, 47612	yes
70	38776, 39170, 7405, 7703, 48449, 41321, 50002, 9745, 67054, 47046, 19455, 54812, 65188, 64144, 43684, 66232, 39864, 73980, 45700, 57408, 20057, 62075, 18761, 20641, 52177, 21217, 64732, 53117, 6989, 62377, 20745, 51011, 22514, 8656, 6588	yes
71	25682, 49391, 41166, 59519, 10339, 13919, 8127, 42912, 62178, 54023, 74056, 48189, 28891, 31189, 26987, 10338, 3084, 43604, 53632, 14524, 58834, 11215, 4677, 37474, 17396, 66475, 54965, 73278, 39347, 42535, 41439, 42709, 47671, 53153, 39963, 36906	yes
72	26730, 57268, 11698, 55504, 22360, 48054, 21269, 21598, 21581, 3600, 50920, 6793, 8843, 61257, 48598, 53750, 41359, 23977, 30458, 14227, 63713, 8619, 5095, 50387, 58017, 4199, 74587, 55562, 46771, 32092, 43943, 3942, 74121, 23966, 59694, 47776, 72700	yes
73	58680, 68346, 41073, 64592, 6083, 42814, 61524, 1497, 20345, 30739, 39317, 34582, 21418, 33680, 45817, 6952, 4796, 33681, 45728, 5360, 2641, 39378, 43261, 11579, 14448, 57661, 30182, 58581, 53000, 65791, 25019, 25951, 20116, 9114, 53846, 4416, 59019	yes
74	69100, 11668, 54806, 18138, 2476, 50222, 13202, 21717, 64716, 69348, 32108, 65037, 37497, 64200, 40436, 66501, 45745, 19490, 37637, 12123, 40579, 36739, 17727, 40977, 67446, 62248, 28745, 4663, 7510, 53457, 39286, 52911, 32566, 22909, 9747, 32786	yes
75	17862, 15939, 74210, 41086, 33805, 714, 61850, 26327, 44084, 3448, 631, 41519, 51382, 35719, 24845, 52103, 7305, 36699, 55124, 6093, 11068, 33407, 1761, 14822, 60002, 10452, 6769, 46153, 43792, 3161, 10801, 20698, 70339, 58219, 59245, 26942, 4569, 19137, 54173, 58183	yes
76	23328, 72319, 48116, 14251, 60898, 15021, 15777, 56884, 67718, 64918, 55712, 49727, 55009, 39188, 15401, 33724, 38998, 65305, 56028, 61657, 46591, 42029, 7402, 56210, 20526, 29319, 47434, 39511, 47420, 24930, 70026, 13954, 71963, 48947, 49030, 18616, 29198, 38677	yes
77	42913, 64029, 40065, 59240, 72408, 14184, 70787, 19862, 5803, 35228, 47068, 71281, 56984, 71145, 13280, 50119, 43923, 72041, 48860, 62066, 55740, 12651, 32924, 43906, 67492, 25722, 63371, 32254, 69186, 38953, 17556, 4627, 10662, 23031, 54348, 35250	yes
78	16584, 36771, 17097, 16649, 23183, 14684, 71200, 29228, 17642, 9644, 61459, 20600, 37222, 22056, 40239, 40271, 59368, 28525, 50457, 61207, 12291, 70512, 64666, 8838, 31589, 8009, 73587, 28030, 37912, 27953, 33390, 51709, 17444, 39804, 61754	yes
79	66899, 73371, 31325, 23748, 2393, 66016, 71865, 7308, 19778, 63236, 33218, 43887, 69604, 59466, 40819, 18530, 66768, 31963, 26368, 40778, 21547, 46911, 5099, 11843, 47063, 58621, 54933, 48390, 23186, 72418, 42663, 60317, 31808, 15309, 67676	yes
80	24288, 64819, 23989, 34020, 32416, 41833, 70390, 17741, 71717, 3599, 65606, 43412, 72304, 65941, 19406, 67083, 13272, 61762, 63177, 15263, 16897, 21866, 41547, 51385, 53996, 26279, 6158, 22701, 860, 70166, 28112, 47191, 20278, 57839, 47890, 26834, 38703, 57563	yes
81	28707, 38720, 58402, 25459, 42719, 22925, 6464, 64747, 4723, 4339, 3852, 71273, 53577, 70712, 216, 72821, 64030, 44081, 63957, 302, 50255, 7829, 48399, 70141, 60850, 11941, 34928, 35750, 44971, 22717, 11156, 71361, 8060, 4801, 42936, 40162, 14690	yes
82	64220, 52744, 45680, 73607, 70666, 32948, 64988, 654, 37309, 68702, 23092, 53353, 27522, 72127, 59741, 4283, 22593, 23463, 62407, 56341, 5759, 39356, 43453, 53906, 68117, 2695, 8874, 66976, 23639, 73791, 73661, 50836, 67287, 46815, 23159	yes
83	18219, 19379, 70008, 51374, 19394, 40561, 33743, 16663, 6409, 22786, 11721, 10514, 33944, 3066, 42394, 42438, 44852, 33568, 51569, 48225, 51448, 42209, 56937, 45942, 55693, 48967, 10393, 65362, 57228, 16855, 38881, 59665, 18115, 44644, 22419, 426, 11235, 55763, 37325	yes
84	20554, 30835, 33847, 4064, 15710, 35393, 38794, 10956, 61413, 65372, 42400, 23650, 69209, 4130, 60475, 16066, 18766, 72420, 14201, 1438, 7817, 5426, 29784, 61434, 24380, 9206, 2383, 25234, 30312, 66796, 3591, 63141, 23791, 5921, 38664, 40641, 15187, 29215	yes
85	67224, 5549, 42460, 42972, 55061, 9324, 2937, 67878, 19029, 55648, 66703, 12292, 41845, 4467, 47944, 37221, 6079, 44853, 2988, 18277, 70849, 52245, 10458, 35369, 31930, 34066, 10284, 41591, 42073, 66187, 23655, 43452, 64278, 51521, 368, 63529, 63976	yes
86	31518, 62713, 39930, 6594, 21013, 63180, 65290, 23166, 69483, 47946, 9068, 42611, 622, 34070, 66423, 64152, 56755, 51573, 44645, 17273, 52423, 25608, 7875, 71080, 7107, 58310, 53660, 43530, 14741, 5110, 27058, 50453, 26778, 33157, 60549, 49875, 54455, 40672, 30653	yes
87	2233, 45507, 43676, 60501, 41955, 38470, 52224, 15217, 49314, 41481, 55977, 33355, 70810, 34947, 11127, 36370, 3514, 70670, 19514, 64882, 66189, 69165, 39846, 34695, 53197, 1673, 60240, 26138, 53552, 20506, 722, 64024, 125, 38992, 59426, 63857, 62410, 1828, 66322, 24241	yes
88	73158, 49897, 71038, 34903, 68890, 26660, 65134, 6871, 34003, 5161, 45619, 67157, 12670, 45066, 36117, 11753, 32972, 69072, 62367, 27335, 58465, 23085, 50828, 6999, 45509, 56670, 57904, 27763, 37876, 60660, 66363, 62386, 65344, 30791, 35485	yes
89	42846, 48147, 19311, 68662, 32165, 17034, 38586, 66336, 13671, 46525, 20391, 47916, 40266, 37019, 21430, 51794, 36970, 70064, 30828, 28134, 20624, 17928, 2554, 42883, 30469, 5757, 29120, 32761, 24924, 43396, 10201, 41832, 63055, 53835, 12167, 52719, 15762, 42551, 9712, 47448	yes
90	73674, 67826, 66250, 68477, 37411, 44331, 28202, 17590, 42977, 34012, 57455, 20837, 2972, 73786, 68032, 13181, 63039, 15111, 36123, 15907, 845, 66882, 69587, 24440, 46988, 45363, 63569, 56179, 48398, 26595, 18970, 63377, 62255, 424, 71756, 67433, 67856	yes
91	16958, 59077, 61841, 7076, 74083, 65474, 50681, 70092, 59210, 16538, 73252, 539, 37455, 55231, 48167, 65667, 926, 9655, 49955, 64118, 32998, 31976, 63369, 70293, 57211, 69064, 48355, 30600, 68081, 28175, 51761, 57275, 51006, 32888, 38773, 15905, 29326	yes
92	57073, 33776, 55948, 51592, 7818, 40899, 40612, 13426, 58613, 21589, 72239, 43289, 57526, 59634, 20198, 5006, 1630, 13549, 43836, 16416, 54945, 2020, 71264, 54900, 11910, 42792, 43805, 35973, 23568, 26752, 45059, 56343, 9440, 42473, 32980, 13532, 1247, 45537	yes
93	38398, 24129, 64439, 7848, 72453, 54409, 35929, 8369, 14597, 12156, 61721, 36314, 66744, 63868, 59433, 32122, 38778, 41125, 17416, 42951, 68630, 21786, 42145, 59372, 50720, 35317, 45076, 54458, 53257, 27960, 62356, 52349, 11009, 27520, 48589	yes
94	12501, 25270, 35528, 49282, 55174, 73016, 57429, 32519, 10590, 11484, 8773, 50141, 51944, 23256, 49975, 58599, 1985, 34072, 46764, 29660, 24182, 46248, 67390, 12597, 65090, 52618, 67149, 40627, 8845, 6328, 73132, 14093, 30202, 48971, 33165, 11602, 20219	yes
95	63045, 57810, 64610, 37630, 33581, 2320, 73146, 17247, 41563, 41936, 46529, 65494, 63996, 49237, 40682, 64095, 10127, 18995, 40685, 40441, 73756, 1166, 39215, 4721, 9465, 36593, 13524, 51095, 32512, 38309, 30339, 64178, 68768, 73040, 63892, 35951	yes
96	73002, 68149, 14493, 46681, 37930, 23875, 12713, 50234, 26893, 49973, 64493, 65482, 27245, 20059, 2002, 31100, 24420, 10428, 22854, 17513, 892, 36731, 61985, 33943, 64595, 45367, 36891, 7623, 55975, 1419, 13094, 74541, 34849, 43260, 45686, 48053, 3805	yes
97	60945, 8706, 18413, 50302, 17055, 59635, 53436, 33918, 54213, 51196, 15508, 39376, 21995, 69305, 39928, 31796, 12589, 32132, 39666, 37776, 6432, 20208, 61702, 5988, 73225, 63577, 73573, 21056, 61679, 45837, 6376, 12854, 58917, 41282, 31405, 11123, 10756, 9098	yes
98	3273, 11673, 62892, 27133, 69898, 26308, 3094, 49483, 72173, 24855, 71091, 3190, 32602, 63007, 14791, 16946, 45434, 73151, 29350, 15477, 68100, 50630, 47402, 31384, 55001, 20885, 63640, 29275, 41787, 41821, 36206, 58780, 49860, 20419, 73384, 2867, 48359, 74576	yes
99	30066, 22420, 9155, 20031, 47007, 73001, 27591, 47905, 38983, 57557, 59684, 61463, 70436, 1099, 4321, 42867, 19094, 52695, 46054, 27582, 61752, 72513, 56085, 37509, 51777, 55210, 2675, 17834, 34854, 61541, 60878, 63296, 70933, 39649, 51795, 67731, 51195, 69901, 26855, 5385	yes
100	64569, 70738, 5230, 18932, 57757, 27642, 29312, 6147, 51000, 44483, 54668, 22591, 15238, 11090, 72020, 60294, 23870, 26250, 25865, 66045, 44248, 27664, 67482, 20550, 51530, 49914, 9618, 37916, 6398, 56527, 43355, 50604, 24054, 46739, 43160, 44244, 43713, 60635, 13618	yes
101	36651, 4655, 70358, 9247, 51300, 8479, 5582, 39079, 17807, 46343, 5723, 23294, 50470, 22762, 46769, 68857, 60619, 13517, 23743, 15358, 16406, 49510, 30314, 29342, 9210, 29448, 35873, 11589, 10821, 15381, 46853, 37647, 10890, 57590, 66048, 41148, 36161, 27158	yes
102	68111, 15969, 3661, 15171, 56732, 58828, 73885, 56407, 36482, 26820, 2332, 72849, 71319, 72737, 64792, 434, 69050, 57801, 42751, 38892, 35444, 46895, 31903, 52501, 18691, 36856, 61623, 36404, 60760, 72514, 24998, 26515, 57392, 57250, 23221, 5395, 8350, 46286, 18332, 38989	yes
103	18889, 56228, 41277, 71914, 35164, 613, 39840, 12543, 56412, 31141, 1958, 19941, 17733, 55869, 61979, 4292, 46072, 59914, 19377, 70959, 28316, 14158, 16570, 43184, 52540, 69084, 49176, 57976, 5878, 29137, 34930, 42671, 19536, 73073, 60058, 48418, 71848, 62948	yes
104	52168, 52273, 43316, 59277, 10543, 3034, 19046, 68991, 10398, 45873, 68470, 17680, 3160, 53608, 151, 22183, 29271, 27702, 59345, 2893, 30153, 35883, 71571, 47134, 60656, 34774, 38701, 46458, 10998, 58972, 11893, 58807, 38988, 36628, 40993, 53859, 31881, 12892, 27192	yes
105	23649, 56277, 60915, 57181, 41362, 20721, 9316, 26153, 56792, 14540, 57935, 6732, 38954, 684, 8193, 17498, 54949, 72111, 31969, 11017, 32152, 55200, 15100, 64661, 58964, 26432, 23943, 67159, 284, 12776, 35958, 60843, 43421, 72702, 36510	yes
106	19289, 21577, 36839, 24561, 48759, 57980, 32177, 2941, 2692, 33018, 40666, 62135, 20019, 66431, 10266, 68669, 66669, 41743, 48800, 11036, 7126, 35807, 43015, 52970, 65992, 10993, 55494, 67956, 41354, 20486, 34027, 251, 40313, 45045, 7193, 37634, 10597, 28229, 29750, 25672	yes
107	53130, 7953, 28363, 67677, 41974, 63649, 51900, 69131, 66137, 49903, 66611, 3590, 50202, 51665, 4280, 12851, 67918, 27839, 59186, 40287, 21850, 51769, 66872, 35403, 48990, 21301, 54261, 52855, 48984, 36150, 12526, 55522, 43336, 51368, 64300	yes
108	2408, 7777, 64420, 22600, 71954, 67648, 57010, 24863, 19272, 11101, 70281, 56980, 9351, 3721, 29057, 22844, 60123, 46585, 4336, 51301, 32965, 46147, 40711, 32140, 13604, 36877, 10666, 53958, 13667, 67749, 1473, 31511, 56250, 31786, 33643, 56490	yes
109	12705, 71698, 64519, 22111, 2349, 43951, 21813, 31174, 61926, 15802, 41758, 13787, 15375, 63226, 59298, 25811, 37895, 55104, 19720, 44657, 20002, 50826, 64480, 23215, 35545, 21205, 10557, 5735, 61136, 1002, 57997, 19183, 69081, 62674, 15496, 20450	yes
110	61747, 5106, 40841, 65208, 59861, 10446, 59939, 47933, 16488, 12362, 30749, 37200, 11587, 28425, 48631, 8755, 43377, 16989, 15903, 65518, 22390, 61284, 39149, 32946, 45033, 72278, 23604, 25299, 47872, 69981, 28823, 2361, 54000, 29632, 37533, 14874, 33872, 37112	yes
111	14058, 62740, 70925, 71603, 21064, 21145, 3675, 6697, 48424, 68621, 35616, 66555, 56565, 13201, 3707, 29918, 8807, 3060, 27054, 58496, 51720, 49694, 110, 67847, 74174, 65525, 21422, 33694, 30278, 25243, 37730, 21574, 10627, 8936, 18497, 12172, 40988, 24941, 61685	yes
112	38842, 38023, 58637, 40707, 57641, 27162, 63589, 43220, 1312, 12070, 47311, 42994, 48013, 67452, 34193, 2896, 12075, 11169, 40087, 71451, 4852, 41408, 59342, 37335, 3849, 16286, 21475, 37396, 41410, 59862, 70084, 35150, 6561, 1110, 73277, 74206, 67322, 20903, 60051	yes
113	35525, 65244, 43080, 10385, 21354, 2245, 50654, 65237, 19964, 54953, 23935, 69219, 59334, 25008, 26775, 68936, 42730, 55576, 69608, 46903, 8629, 62450, 47080, 49172, 42822, 67021, 41238, 3155, 10014, 35134, 26367, 69621, 66009, 68516, 66328, 9285, 56931	yes
114	72292, 59687, 32014, 37935, 41805, 38265, 59734, 28256, 47674, 26871, 10698, 18477, 27420, 26584, 44595, 25124, 18950, 29287, 934, 53215, 17459, 67948, 8258, 36350, 28416, 57107, 40112, 66490, 63359, 2752, 16065, 62621, 46369, 61950, 28001, 56676, 35846, 8315, 70665, 53676	yes
115	49378, 58028, 32976, 62965, 16769, 1041, 43021, 50627, 54327, 47122, 45986, 10579, 60976, 46985, 25566, 57231, 25582, 52183, 59602, 20774, 29577, 31887, 9750, 6860, 72875, 57203, 4054, 11718, 61001, 66244, 18965, 68693, 29061, 392, 43743, 23458, 29434, 70732	yes
116	68014, 21606, 56077, 46171, 24256, 29031, 68582, 41687, 59598, 74665, 57670, 52350, 64418, 42193, 33969, 74577, 41218, 47607, 58113, 16056, 28093, 47558, 36147, 65703, 28190, 64705, 68655, 39839, 7041, 31365, 15554, 29393, 32366, 28319, 48550	yes
117	71289, 20395, 21211, 8731, 33654, 6279, 25628, 28253, 69750, 59652, 22100, 40280, 41151, 44686, 15568, 49127, 25594, 13080, 69675, 2921, 33682, 63686, 57470, 23861, 45549, 8355, 43158, 17429, 24847, 5483, 16402, 31107, 11844, 58494, 69663, 28676, 24089, 23387, 8926	yes
118	14046, 2648, 63001, 49119, 18721, 61000, 32044, 41270, 40970, 26891, 33001, 24879, 17784, 60818, 40276, 37329, 7716, 27594, 55102, 42340, 44449, 24280, 61461, 65178, 5710, 3951, 30983, 13881, 7776, 18695, 23823, 4022, 27026, 57299, 61399, 28948, 21288, 32823, 72510	yes
119	45601, 50096, 3478, 29770, 41459, 15879, 66302, 1610, 20794, 22259, 19894, 61825, 35341, 36105, 7786, 25514, 15341, 74228, 27144, 61844, 58840, 68278, 21610, 24291, 20921, 53219, 36600, 15157, 659, 73664, 22731, 58321, 68068, 14416, 36443, 44498	yes
120	37947, 59273, 29614, 55298, 39218, 31047, 49810, 37261, 37192, 48904, 41051, 72496, 8644, 37451, 40636, 17342, 66183, 42011, 61613, 45210, 53160, 3197, 55375, 4465, 69511, 19154, 3674, 63745, 11381, 69238, 57066, 64018, 26139, 42277, 49019, 71106, 1059, 10536	yes
121	62295, 34612, 66837, 7369, 55898, 62633, 65788, 8185, 18309, 68629, 57608, 12037, 33753, 34540, 54853, 24220, 21890, 15014, 10440, 28243, 35234, 6938, 26818, 37423, 10218, 72721, 42684, 26050, 57917, 25252, 64066, 7739, 46755, 8637, 31500, 73708, 36641, 16123, 37040	yes
122	65042, 70619, 51069, 6087, 56856, 69687, 5827, 28152, 42858, 52673, 33167, 63653, 64025, 8128, 1244, 64764, 56759, 32627, 28167, 16184, 55330, 18795, 22564, 68529, 48915, 19576, 23043, 71055, 19276, 32028, 6347, 60399, 17668, 9154, 28431, 49254, 45128, 2766	yes
123	7030, 41537, 46058, 73769, 6691, 32109, 3392, 53762, 70363, 57969, 3481, 43784, 22105, 1340, 40244, 51393, 70268, 46212, 8636, 22134, 70034, 42044, 60379, 17341, 9779, 70526, 31276, 1568, 45178, 72901, 66464, 43912, 6925, 21361, 23520, 71949, 41127	yes
124	69570, 13535, 57683, 27056, 16220, 16895, 47428, 53805, 43159, 42690, 68095, 64135, 36062, 30113, 28989, 69136, 8397, 4826, 6611, 52418, 6474, 54820, 33962, 30509, 14637, 67707, 60771, 59696, 54061, 59558, 2377, 24377, 59244, 11568, 67689, 10726, 43814, 64251, 1962, 12480	yes
125	21701, 71250, 8199, 32952, 43698, 36667, 47907, 53806, 11363, 2502, 29584, 63109, 468, 56440, 13106, 21463, 50665, 8339, 67081, 53039, 36100, 74142, 42963, 53804, 20998, 38533, 55381, 48241, 24790, 23658, 51998, 41424, 15131, 48713, 69646, 12758, 42106, 1946, 65986, 14914	yes
126	64501, 18128, 55307, 1185, 21487, 72359, 34249, 47652, 55575, 55335, 25339, 63069, 52051, 30825, 33471, 8142, 33802, 36282, 18068, 74264, 59527, 61253, 65513, 31345, 45665, 32437, 59346, 26300, 45517, 37217, 26948, 28640, 7768, 54800, 11260, 13502, 20959, 59743	yes
127	56316, 7564, 34775, 13720, 37430, 40043, 45978, 35786, 15104, 6653, 5036, 69479, 17749, 33582, 49796, 71994, 60759, 55798, 31759, 38762, 34811, 65631, 63621, 18398, 71902, 73217, 26454, 55278, 66687, 21872, 16174, 19516, 51309, 58222, 55935, 16644, 35547	yes
128	46190, 66644, 38138, 9258, 55225, 54229, 34111, 66684, 66774, 27145, 30326, 73582, 63437, 22738, 38295, 9391, 18149, 4067, 33342, 69496, 4780, 52407, 54195, 44085, 39151, 43358, 51575, 27372, 73529, 15269, 43469, 5539, 25532, 34750, 6757, 21742, 3485, 48150, 27147	yes
129	20120, 22671, 72608, 8231, 61976, 4102, 15639, 25161, 55195, 40177, 50653, 41730, 72034, 53659, 19314, 14894, 50808, 11194, 155, 14850, 58912, 69287, 66751, 61311, 20260, 44627, 14377, 56109, 55190, 20598, 7771, 70735, 47601, 777, 60270, 18025, 66002, 14146, 22126, 51317	yes
130	58987, 69814, 21331, 22246, 23546, 62359, 5481, 27274, 66124, 1300, 3473, 72651, 21428, 71092, 24428, 27317, 52522, 46375, 6590, 67244, 12113, 53315, 18943, 66829, 35563, 70726, 65441, 8047, 12814, 62213, 13870, 2097, 45803, 53356, 37520, 730, 23334	yes
131	70359, 47737, 8094, 64844, 44291, 42101, 46326, 37625, 49320, 29540, 38799, 48132, 27959, 62447, 18090, 52179, 71231, 12985, 60285, 54582, 20750, 637, 27323, 34421, 29317, 40715, 24970, 57725, 29746, 47427, 816, 12757, 17510, 59470, 38653, 43744	yes
132	1821, 58617, 13428, 57549, 23895, 16578, 67528, 32514, 69075, 30959, 46027, 68975, 4034, 72749, 66420, 8893, 4513, 67497, 27796, 2058, 60972, 1686, 60596, 5901, 70514, 13807, 26736, 41375, 48200, 70764, 20374, 42966, 46449, 11846, 17439, 44172, 11773	yes
133	55656, 33367, 38081, 45660, 4598, 46530, 34035, 35772, 64079, 16802, 20394, 46599, 60582, 5599, 55141, 72806, 40518, 60152, 60329, 67212, 19322, 37896, 44915, 60234, 30930, 63836, 27239, 26017, 14810, 40297, 23382, 47743, 42735, 11882, 31072, 73955, 2807	yes
134	8920, 10269, 28639, 20333, 51377, 67502, 22828, 39596, 17972, 50291, 41458, 7656, 24770, 25063, 14687, 67612, 72216, 17265, 43084, 58215, 506, 31775, 36608, 20050, 26840, 5966, 54562, 14908, 15826, 33504, 22610, 53012, 6196, 2481, 42397, 2738, 2750, 44144, 44666, 6866	yes
135	17154, 1358, 38968, 8721, 71427, 67200, 69920, 71999, 18031, 63119, 8519, 63320, 15146, 17208, 18893, 69761, 23487, 5741, 12008, 27722, 52368, 5440, 29265, 13800, 66869, 54209, 5837, 66010, 2871, 21405, 7050, 61432, 1586, 30654, 60708, 50514	yes
136	47927, 72941, 53224, 25184, 59381, 43118, 32686, 70479, 3232, 51679, 4009, 9176, 3606, 67691, 67700, 26431, 37047, 20862, 72290, 1322, 73156, 58280, 45134, 2079, 10937, 26574, 58765, 37317, 20521, 48557, 46141, 34227, 40929, 12444, 23829	yes
137	14689, 47913, 57037, 64839, 21058, 32183, 38493, 68652, 28370, 45304, 24537, 66023, 19891, 70656, 45748, 39967, 45569, 14829, 43033, 32724, 24806, 72551, 16313, 65856, 34222, 3398, 583, 70579, 27336, 21204, 9333, 1700, 3178, 57479, 36789, 71651, 19453, 47185, 10538	yes
138	54065, 33620, 31694, 47686, 42259, 68701, 34208, 12555, 47433, 46572, 10823, 37621, 40748, 7488, 37146, 8878, 52162, 31418, 55889, 42495, 73751, 38, 41419, 48126, 1882, 8403, 67372, 16007, 4441, 4452, 10977, 72923, 5044, 30420, 33904	yes
139	54255, 12146, 68681, 31910, 74033, 21228, 16099, 14948, 2054, 67432, 11452, 42778, 63613, 49029, 6828, 25647, 28637, 29988, 1259, 71358, 39120, 22568, 68574, 39458, 68207, 73109, 48113, 52196, 5551, 48509, 43737, 29578, 17052, 10815, 72480, 53488, 3544	yes
140	72070, 31912, 42637, 17137, 56738, 16870, 19291, 16504, 23096, 44837, 34763, 26317, 56837, 27738, 25350, 31809, 74134, 44341, 27914, 59111, 6476, 10334, 61117, 1, 2840, 60827, 22011, 32104, 11770, 43375, 26361, 39828, 48824, 37635, 72878, 46746, 60180	yes
141	67169, 54828, 42126, 8528, 32878, 72023, 50776, 6425, 7478, 9456, 55817, 59587, 2319, 4599, 26464, 46868, 64567, 25884, 58304, 65070, 8019, 3358, 15046, 15065, 49962, 64068, 48638, 47065, 26759, 19572, 59930, 21733, 14767, 25399, 663, 9983, 24549, 7090	yes
142	35475, 39912, 8317, 31033, 42217, 5940, 47305, 68783, 22713, 59510, 25268, 74020, 15695, 69666, 71569, 66508, 2219, 36802, 65358, 9503, 25777, 57023, 60496, 17482, 44185, 52082, 16572, 28549, 43343, 23332, 26911, 23226, 65359, 28455, 65996, 36471, 41350, 43276	yes
143	62519, 15612, 8356, 31301, 1279, 44656, 24488, 32892, 58946, 47966, 33951, 67182, 55404, 1640, 56655, 27496, 69187, 35693, 32247, 20030, 10714, 11659, 30658, 40416, 15530, 22900, 26630, 60929, 62775, 71986, 62432, 2857, 25193, 58110, 60668, 27540, 72943	yes
144	3283, 4254, 28410, 72680, 45342, 33276, 13734, 53888, 56744, 49516, 74414, 52465, 73819, 5163, 2080, 14554, 67248, 65935, 22401, 51346, 10075, 34742, 932, 37926, 45996, 68527, 68435, 25108, 61157, 28421, 1378, 16801, 26796, 10462, 73180, 59274, 22515, 10043, 53612, 13330	yes
145	62516, 41718, 39672, 19885, 59046, 2652, 50319, 28358, 26772, 22655, 64286, 21704, 44163, 55115, 53857, 9840, 66113, 55333, 8325, 67724, 6777, 50390, 51193, 54397, 18247, 1888, 11868, 1704, 72185, 35332, 70913, 46521, 2343, 42868, 55969, 42216, 26099, 73761	yes
146	55058, 48639, 58677, 15841, 54040, 36807, 10889, 43971, 27615, 6166, 56242, 74627, 30459, 35005, 35923, 74183, 55832, 35809, 32024, 67304, 16951, 72999, 9301, 48752, 19070, 58861, 49016, 73747, 68687, 53249, 61384, 27250, 10567, 43296, 31620, 20160	yes
147	40674, 9977, 63070, 23410, 11049, 20089, 18620, 58390, 54577, 58841, 18476, 33667, 36194, 11878, 67949, 22866, 6869, 2216, 61478, 19633, 56892, 61849, 35320, 1648, 34096, 67533, 10423, 6206, 46024, 16591, 11136, 12465, 34709, 8979, 33659, 57966, 41111, 36129, 43944, 46367	yes
148	18117, 41250, 43964, 8571, 6149, 18676, 16435, 285, 49902, 65241, 59632, 23121, 71888, 13182, 13268, 71613, 13677, 55189, 35658, 58625, 22821, 9427, 12471, 46252, 27747, 26286, 271, 50034, 33799, 70971, 69651, 13186, 64922, 65593, 74214, 49475, 48383, 46220	yes
149	50326, 59442, 21066, 73311, 16350, 58127, 5619, 51359, 44086, 30625, 19672, 36036, 21898, 29128, 52344, 32991, 56392, 621, 62035, 37623, 58682, 4946, 3442, 46219, 36917, 8828, 69422, 72444, 50858, 31554, 67046, 31315, 39980, 35705, 30691	yes
150	9134, 74044, 33596, 65506, 42309, 54619, 67414, 14000, 561, 74640, 64443, 3097, 46931, 56865, 72213, 47947, 1745, 45712, 14944, 46490, 12673, 41662, 2640, 59323, 32778, 1101, 64969, 36823, 37672, 66134, 9180, 12143, 29117, 27460, 26205, 19812, 19645, 40179	yes
151	72840, 52901, 28773, 18088, 20533, 20194, 4301, 41811, 66777, 49685, 43771, 55899, 25479, 60581, 27422, 54731, 67576, 22085, 27759, 8119, 9739, 30101, 37806, 63882, 66514, 30971, 67819, 38164, 70584, 45707, 13234, 43549, 18202, 48210, 11750, 50444, 8866, 62192, 15202, 68318	yes
152	11113, 50807, 52966, 14, 73378, 5225, 54955, 74396, 31641, 63499, 50886, 23035, 6456, 51139, 55291, 15990, 33264, 52065, 47223, 57721, 57292, 20184, 17575, 51947, 13854, 53343, 37833, 65050, 53301, 28252, 56873, 31228, 42268, 6879, 56642	yes
153	39189, 57242, 63634, 32667, 21464, 1597, 39177, 30756, 56506, 31170, 5646, 37861, 26564, 65129, 37429, 52596, 10436, 50561, 62215, 57029, 39618, 11739, 32927, 63789, 5109, 26673, 40569, 31235, 15865, 5064, 16385, 39571, 41001, 187, 53619	yes
154	15958, 38807, 73013, 13602, 67619, 58104, 58025, 63817, 7849, 56590, 47752, 57457, 47393, 31627, 2132, 39270, 26359, 54392, 10225, 35111, 74395, 63656, 4630, 62161, 62939, 58134, 60819, 500, 30374, 57473, 36782, 22961, 40318, 69487, 42325, 20247, 51609	yes
155	34004, 12301, 30440, 5919, 36085, 40127, 16671, 51429, 57363, 36772, 6809, 69787, 40802, 70300, 9145, 53280, 18940, 8069, 3696, 34521, 34019, 57353, 10959, 28361, 29916, 8966, 58124, 50154, 24051, 44874, 71889, 22461, 4762, 35339, 14749, 29787, 11431, 58377	yes
156	22839, 49563, 32287, 74344, 33061, 73843, 39774, 35602, 12883, 58566, 48991, 1102, 31193, 68221, 68000, 3948, 73863, 47478, 66177, 31471, 7133, 15180, 35418, 62718, 68164, 67298, 3760, 34700, 38408, 52107, 60985, 11104, 57359, 60339, 40469, 28097, 5650, 35988	yes
157	51774, 46810, 58720, 65366, 14513, 11617, 66246, 40316, 69087, 69029, 53020, 53091, 40687, 29682, 53900, 16923, 39696, 73322, 51707, 20226, 67836, 292, 35127, 45057, 34506, 67714, 40070, 1788, 7287, 1190, 18316, 3004, 44787, 857, 52230	yes
158	12296, 17129, 41627, 24018, 7341, 24457, 42491, 3535, 41119, 3295, 66379, 65621, 3826, 51673, 2685, 39012, 18613, 72792, 18113, 35439, 60749, 62568, 46907, 6284, 44650, 42664, 62347, 42497, 27780, 36940, 411, 6680, 17860, 28562, 44151	yes
159	18093, 14973, 60795, 19842, 10094, 66652, 35674, 43468, 47049, 65536, 57335, 34336, 72968, 62835, 48629, 4285, 40131, 46533, 52339, 59110, 22641, 60334, 62140, 40684, 60299, 35739, 68790, 45127, 39119, 35725, 26617, 62681, 55075, 29907, 49948, 29953, 36103	yes
160	2260, 8249, 17393, 44200, 50289, 40338, 47845, 47494, 2604, 19801, 45122, 9461, 27912, 34588, 38908, 69312, 55585, 62767, 14083, 60428, 72314, 62924, 51766, 1883, 19695, 60810, 37215, 74520, 11247, 40466, 33039, 25477, 24839, 24448, 5326, 16766, 31472, 66030, 63599	yes
161	21594, 22173, 13931, 33798, 36309, 15390, 25574, 59794, 34450, 68419, 54824, 58274, 33730, 45633, 52991, 19412, 6943, 74340, 38410, 43218, 3694, 3793, 62839, 23213, 70654, 8166, 60538, 63606, 19186, 25662, 2924, 60006, 18362, 63027, 7191, 5082	yes
162	32855, 29307, 19978, 58989, 69251, 177, 44683, 56463, 8482, 45590, 70235, 74586, 42733, 32624, 3469, 46715, 58123, 12789, 19800, 9633, 63731, 47957, 51516, 34221, 46603, 67186, 59774, 50075, 64647, 60625, 58569, 7303, 73163, 39657, 29003, 24234, 24768, 38147	yes
163	23219, 24741, 20710, 18738, 66615, 10097, 26933, 1847, 29411, 66086, 70740, 63728, 46547, 44820, 73957, 30661, 72785, 39288, 26136, 32905, 60213, 34529, 22123, 38557, 44741, 34015, 53685, 43602, 40432, 43195, 7110, 60923, 56483, 57991, 784, 53077, 51669	yes
164	66702, 41597, 34440, 31433, 13192, 14296, 22078, 58673, 51535, 51114, 5217, 380, 46964, 55417, 41300, 71472, 17988, 41669, 54104, 62777, 7761, 25929, 25138, 58380, 47220, 4263, 10152, 51916, 38707, 55140, 32347, 74081, 49195, 21083, 19938, 71480, 72012, 22837	yes
165	57396, 34473, 36705, 61010, 28272, 63051, 57972, 45394, 16195, 55600, 8430, 53784, 60842, 51788, 59499, 1220, 69465, 14263, 28720, 4432, 24904, 67288, 68495, 68636, 26394, 11196, 60649, 42094, 38967, 4661, 63249, 51990, 8507, 27709, 30201, 56050	yes
166	59375, 46888, 23179, 10647, 74267, 67069, 34452, 65805, 73100, 57746, 30980, 25701, 10101, 10430, 23291, 73903, 61766, 72758, 38099, 26267, 41344, 34207, 3116, 39682, 24204, 31374, 29343, 54278, 47165, 28907, 14983, 22268, 38089, 19189, 72324	yes
167	57835, 55868, 46928, 69267, 48723, 64205, 63, 42689, 29461, 68038, 17883, 13091, 67042, 4738, 33985, 74017, 20266, 34951, 57981, 8086, 57031, 34245, 53316, 69758, 32188, 5590, 4977, 8013, 43179, 26536, 70198, 35023, 6140, 47891, 70924	yes
168	49995, 45624, 23565, 22928, 8085, 279, 12919, 17885, 50003, 64084, 48516, 54063, 2072, 32827, 1973, 983, 65204, 73070, 71401, 49126, 45004, 50266, 51456, 19530, 66793, 8342, 28144, 25715, 64818, 70634, 47156, 49436, 48292, 50526, 31741, 57635, 53013, 9050, 35015	yes
169	3634, 73143, 8030, 34651, 52089, 53152, 64227, 42431, 24206, 12628, 35861, 21113, 58190, 51225, 28678, 70970, 41884, 53992, 30628, 58635, 69817, 20430, 53206, 68276, 10983, 56584, 11204, 44856, 36960, 64974, 16223, 60421, 752, 64908, 65439, 47167, 23261, 32063	yes
170	64571, 61116, 2917, 4550, 39290, 63804, 3860, 54085, 1733, 23630, 73557, 42301, 54883, 44136, 64037, 16537, 29088, 72028, 46057, 63409, 73123, 19393, 4123, 1974, 4898, 72826, 41788, 48502, 2534, 28012, 1212, 59683, 62523, 57187, 36606, 1025	yes
171	37536, 41674, 34617, 1600, 55205, 2581, 21706, 46886, 14643, 14888, 9698, 56093, 20762, 47951, 45369, 70591, 11772, 22872, 22055, 56496, 62445, 67167, 5087, 8834, 17564, 49492, 66316, 71000, 35027, 69977, 70673, 45220, 1727, 59549, 66677, 61049	yes
172	39952, 52353, 65032, 19880, 30841, 17349, 4936, 33574, 66631, 35854, 32954, 60526, 36925, 49212, 29172, 66729, 60064, 3211, 55742, 72543, 40783, 56875, 24763, 18012, 74160, 68789, 12505, 45148, 67752, 22534, 24617, 5288, 23084, 57817, 14965, 10392, 29358, 59661, 39141	yes
173	19951, 50223, 20629, 46352, 6475, 25335, 60716, 39016, 30217, 19102, 65194, 64581, 44267, 28437, 15045, 73964, 66114, 12213, 12775, 6016, 6325, 65582, 20457, 53472, 65564, 8662, 37726, 34783, 33536, 22481, 44781, 66713, 41158, 18412, 66989	yes
174	38553, 32759, 60830, 17159, 65238, 11500, 45096, 37658, 60568, 7454, 4844, 50634, 66812, 19396, 43321, 55248, 50682, 8097, 41039, 67761, 73256, 63410, 7827, 64506, 45447, 4390, 6553, 49950, 73464, 1146, 28010, 11708, 7952, 25445, 51662	yes
175	41823, 49186, 8387, 49218, 6287, 7676, 16795, 61201, 48086, 19288, 31097, 38221, 74299, 611, 40173, 3613, 28094, 38818, 37021, 46941, 59554, 54571, 65225, 6073, 29207, 25412, 16294, 760, 69995, 46904, 28318, 2053, 49275, 3898, 65079, 60174, 50899, 36609	yes
176	59996, 15260, 14001, 5061, 45731, 71197, 17565, 37605, 26161, 66681, 62264, 20344, 41138, 25980, 61112, 70510, 29512, 25916, 13438, 45584, 52108, 68622, 57027, 53519, 69273, 56213, 28117, 17336, 34760, 45333, 14796, 27005, 36033, 32242, 20144, 60391, 45829, 47580, 50602	yes
177	16366, 53985, 25369, 74493, 46184, 35104, 34382, 40478, 45086, 39013, 48102, 16777, 65902, 63194, 31954, 68716, 50414, 60627, 35384, 2322, 64175, 4810, 42881, 49640, 50225, 59548, 17202, 20465, 41760, 4026, 58197, 49677, 28686, 20403, 61, 51826, 3775, 28971	yes
178	62039, 4274, 24128, 17773, 43949, 43605, 44448, 65226, 50194, 6973, 62282, 12101, 45703, 63238, 28104, 73497, 55274, 2324, 58707, 19239, 49623, 25619, 28150, 25633, 59151, 9315, 54974, 36323, 56064, 27706, 72435, 26717, 63855, 47458, 37936, 33110, 37732, 44353	yes
179	70345, 5160, 25778, 8385, 20228, 12399, 4079, 59138, 37892, 71598, 27364, 59068, 59586, 27750, 4678, 5088, 19863, 12582, 12531, 59130, 26748, 26195, 70356, 880, 55707, 27943, 54018, 54196, 18741, 69372, 51523, 29528, 41356, 48452, 61208, 13292	yes
180	47517, 46210, 3865, 23383, 25029, 31888, 26966, 52628, 21624, 62512, 70607, 39439, 54894, 52471, 38806, 68252, 50723, 45018, 38010, 10699, 29502, 66107, 42652, 38282, 26967, 18555, 4347, 18135, 12018, 635, 38751, 44672, 71164, 57559, 33877, 15827	yes
181	28432, 67139, 9744, 73629, 39533, 55589, 42176, 51261, 52897, 11501, 48456, 14148, 11187, 57053, 213, 27159, 25959, 10840, 50532, 3930, 33469, 70777, 1562, 42212, 13210, 52803, 16792, 16862, 56195, 13239, 41271, 57174, 29942, 68953, 40607, 41659, 31899	yes
182	65140, 5898, 72910, 68324, 22875, 53972, 59672, 22160, 32020, 43432, 27357, 54506, 38005, 54878, 39945, 15937, 3318, 43402, 57816, 29544, 8174, 70761, 30633, 27163, 17325, 37072, 3364, 4400, 37090, 23323, 63819, 4681, 65556, 18230, 2526	yes
183	30689, 4141, 692, 74068, 59301, 31206, 26188, 36643, 47362, 68886, 52565, 67962, 3885, 52132, 33384, 54996, 65827, 47940, 22193, 20823, 50935, 33358, 48508, 28959, 48855, 14558, 60689, 55429, 28867, 41457, 15044, 73253, 11320, 71296, 59132	yes
184	2032, 28630, 70217, 73342, 33674, 71533, 37834, 61582, 36234, 21847, 26877, 18357, 31667, 23262, 39746, 56844, 56848, 58135, 65435, 13171, 4231, 62019, 6835, 56827, 17627, 54200, 40499, 28746, 51799, 58857, 43043, 32313, 61487, 70693, 43215, 3268, 44651	yes
185	22023, 67447, 20949, 72372, 40936, 66191, 58266, 5653, 24321, 734, 11231, 63559, 51, 39966, 26115, 35433, 69233, 52822, 70037, 68283, 6027, 24925, 24960, 28326, 47480, 50531, 63565, 27654, 24426, 58643, 30041, 58177, 62942, 25115, 11340, 37051	yes
186	54632, 74455, 55995, 49666, 72497, 16736, 16564, 5455, 54259, 6607, 51163, 29017, 25987, 41418, 62104, 54179, 17905, 29385, 1417, 74164, 45708, 28218, 34905, 52121, 9329, 39528, 17958, 57025, 57931, 48293, 44995, 36145, 23737, 73490, 49630	yes
187	12706, 54830, 25436, 29437, 2497, 34996, 28606, 39786, 3387, 69336, 29741, 15839, 57990, 38086, 63475, 1351, 64657, 14851, 1251, 8996, 29355, 19460, 4456, 12236, 28982, 65947, 56594, 60237, 60406, 65659, 68590, 7286, 35123, 10134, 70771, 52924, 70560, 68371, 39867	yes
188	5169, 19902, 7212, 73533, 15645, 8141, 4065, 68747, 21541, 25769, 23949, 14737, 55844, 57859, 9738, 43828, 34610, 14417, 42225, 23929, 26919, 3686, 40718, 35476, 44019, 49173, 41722, 22081, 63037, 56204, 20207, 64489, 72853, 53290, 47764, 35000, 36638	yes
189	49123, 17387, 9504, 30657, 35469, 20579, 59779, 55296, 12687, 6249, 31697, 32393, 67624, 59307, 2083, 12042, 63890, 32969, 355, 65581, 73056, 18318, 12446, 42405, 70707, 73276, 14918, 11679, 32304, 3437, 71992, 6366, 48076, 49334, 10530, 36218, 36024, 64374, 45131	yes
190	23357, 12856, 33079, 42082, 62821, 35760, 49265, 42486, 8795, 28586, 44532, 69153, 36476, 27785, 50971, 26009, 23746, 61467, 59995, 68326, 7965, 62751, 48697, 70630, 63941, 40006, 64760, 3102, 44364, 10918, 55769, 15533, 15087, 16535, 39595, 1204, 54871, 24594, 39267, 8534	yes
191	66083, 59192, 35668, 55840, 74108, 27127, 13064, 68145, 17488, 23468, 32310, 62957, 50482, 46360, 10743, 72761, 24133, 54944, 44693, 20797, 18049, 42161, 17974, 39320, 11380, 20161, 21935, 56595, 57498, 23301, 36656, 10270, 19734, 56748, 42584	yes
192	44792, 42960, 31000, 65669, 25054, 2392, 24116, 20884, 13325, 60443, 34665, 68593, 14618, 50537, 50208, 40786, 17945, 16506, 73523, 1129, 32879, 32054, 14020, 20257, 71947, 15822, 18428, 20329, 67506, 42450, 70755, 37172, 69852, 48519, 7356, 2287, 48339, 57726, 20239, 6308	yes
193	64721, 24995, 26494, 38516, 54223, 66273, 18633, 65769, 321, 40198, 43653, 49770, 43666, 72542, 65540, 42330, 65906, 60372, 21033, 54240, 24868, 24633, 11081, 11946, 56495, 72649, 53399, 39260, 32434, 47092, 12454, 54220, 41464, 5716, 2358, 34694	yes
194	47877, 70013, 24212, 9961, 2510, 48306, 7576, 7891, 63406, 48163, 57040, 70426, 56587, 46639, 25403, 40902, 7697, 47146, 14214, 30262, 74028, 35747, 41678, 10944, 34040, 67665, 17130, 52764, 30976, 33507, 11139, 73508, 23385, 43904, 1306, 6051	yes
195	7838, 61730, 54257, 13057, 57582, 6525, 8441, 54184, 45430, 20874, 34693, 25157, 38580, 49136, 57915, 60608, 41387, 441, 13911, 45832, 13271, 49465, 14099, 3645, 6785, 34585, 40860, 55659, 37584, 12737, 42403, 33406, 72914, 2235, 45085, 34960, 17330, 72834	yes
196	25822, 74110, 24954, 38877, 38343, 44347, 44953, 35735, 37824, 3081, 58903, 57432, 46795, 37568, 57208, 47648, 16542, 13939, 49250, 19331, 34805, 4894, 29862, 47711, 15799, 45808, 40076, 13371, 20261, 43526, 56231, 67226, 60571, 46801, 9732, 56979, 28615, 3003, 68280, 13643	yes
197	52797, 34468, 36935, 23567, 49213, 59170, 15551, 68576, 754, 67256, 40879, 68506, 56486, 134, 59617, 40049, 2576, 56926, 56466, 43900, 30152, 4238, 10905, 44068, 2866, 37904, 56256, 14403, 64050, 28185, 30043, 28128, 37351, 49812, 203, 67736, 5528, 57782, 24732, 4162	yes
198	65040, 11654, 69095, 2025, 45859, 61874, 40754, 66691, 46437, 36979, 71915, 58630, 57306, 58718, 67591, 65342, 50167, 8695, 45674, 49720, 8714, 69903, 8198, 53066, 67415, 13747, 48603, 64046, 9809, 36820, 25081, 50962, 39271, 71028, 38247, 10308, 14570, 49159, 13986, 8575	yes
199	54060, 71808, 69612, 23770, 27468, 43226, 49564, 29740, 40409, 25936, 30020, 35559, 18008, 8998, 56280, 1225, 43164, 27675, 13970, 27937, 7957, 36745, 17489, 71820, 53415, 51601, 45211, 63799, 48973, 44031, 24232, 52733, 53591, 53607, 69947, 44906, 42575, 71587	yes
200	41738, 66867, 22417, 29046, 36855, 3832, 17753, 58003, 43191, 50721, 69536, 29848, 9408, 8366, 51425, 19008, 36973, 46702, 68508, 59255, 57776, 36171, 45264, 66563, 65573, 27725, 63778, 1604, 28021, 2518, 66042, 29613, 22519, 16191, 34418	yes
201	53816, 38143, 13486, 14137, 1927, 73303, 19015, 55834, 64161, 5911, 13567, 14410, 44718, 66938, 22356, 26366, 40024, 3049, 24810, 48095, 30119, 21499, 9207, 62361, 18944, 22414, 57648, 25525, 56367, 28696, 61300, 52763, 67892, 69353, 17829, 5786, 13744, 6391, 56257	yes
202	47471, 64080, 59322, 27940, 68976, 20166, 56898, 26558, 63204, 3528, 1422, 17186, 53186, 51206, 45690, 64120, 47437, 41807, 39210, 19663, 60679, 9208, 67532, 33778, 30864, 39175, 64964, 29346, 20139, 71046, 51614, 65377, 14953, 54376, 64321	yes
203	27284, 38932, 32484, 51490, 10124, 24588, 51919, 32327, 35294, 38900, 35359, 57665, 18006, 61807, 20243, 47100, 60045, 29466, 45193, 44459, 25560, 27161, 47435, 45214, 16443, 36502, 45594, 39570, 39134, 3238, 26923, 22185, 23192, 69709, 45767, 65915, 3272, 44360, 12661, 11412	yes
204	27020, 1801, 18130, 35613, 7404, 27570, 26635, 9095, 74178, 51332, 35076, 1732, 40740, 51219, 62139, 50559, 12941, 66730, 3080, 66718, 44278, 27946, 48834, 25648, 1717, 26305, 39178, 54488, 22894, 28428, 56090, 50080, 55604, 30487, 49800, 15008, 15236	yes
205	19618, 11867, 45994, 31438, 29752, 1606, 14892, 17935, 34534, 3208, 30080, 9709, 14177, 37752, 36780, 12049, 11811, 53976, 34964, 47997, 25584, 19937, 16568, 50079, 39044, 26499, 50351, 12270, 64149, 6268, 46304, 11681, 28564, 51955, 27679, 69427, 16553, 48773, 50995	yes
206	35534, 33750, 5608, 47053, 6541, 60319, 66369, 48386, 26106, 68250, 3075, 30500, 30995, 15537, 55334, 53893, 21317, 21860, 11740, 39100, 11606, 34926, 9298, 24656, 4472, 5279, 58583, 13599, 58611, 7881, 36998, 11490, 13155, 65016, 53538, 18095, 69332, 70834, 32210, 45247	yes
207	5223, 58726, 23910, 4448, 64902, 9862, 17433, 30823, 24852, 18725, 71371, 1150, 55559, 60820, 32571, 51798, 68378, 2207, 27280, 61737, 41042, 42887, 56698, 57680, 18261, 52152, 54942, 52983, 25230, 50873, 50050, 71707, 70234, 66472, 41580	yes
208	25419, 43597, 73302, 23444, 72907, 61896, 56631, 49414, 41058, 48949, 56700, 30927, 35715, 56366, 14978, 35151, 59108, 57558, 22286, 4964, 69285, 7049, 43875, 14773, 21231, 7458, 47559, 21016, 38106, 26172, 25640, 12554, 10642, 72479, 27142, 23930, 67960	yes
209	8848, 9569, 23518, 39616, 72094, 22745, 38757, 9080, 58405, 27041, 57855, 62520, 32150, 68425, 56509, 20451, 46335, 38863, 52770, 41029, 37979, 55311, 20499, 6150, 23485, 61048, 59175, 51670, 34442, 49101, 6977, 11551, 67105, 67781, 29471, 6498, 11399, 67595, 74301, 16318	yes
210	52981, 25074, 51203, 45983, 1067, 32834, 10744, 50241, 32628, 13518, 48127, 3470, 21997, 53939, 48982, 30802, 61014, 41386, 23669, 12561, 37891, 61688, 34900, 57385, 29725, 13635, 57920, 37298, 66098, 58350, 31016, 70019, 65882, 29927, 71573, 56019	yes
211	55484, 40181, 31094, 34153, 13303, 16203, 73565, 68332, 48, 44127, 15294, 43970, 11752, 57544, 62426, 30734, 72819, 690, 58796, 55685, 23039, 3529, 31296, 70082, 52748, 46672, 55394, 72035, 65367, 31245, 26732, 937, 24752, 52794, 67187, 72592, 70242, 12043, 22832	yes
212	53698, 52919, 46485, 11726, 43394, 47074, 46423, 61205, 64413, 51819, 17353, 55657, 66313, 50872, 25738, 20384, 24475, 7277, 33142, 55947, 38537, 6473, 66071, 62001, 20587, 50580, 34, 6825, 58473, 26656, 25180, 34722, 73546, 22325, 20392, 17301, 34291, 14333	yes
213	13590, 66256, 9830, 12485, 53154, 729, 25973, 29920, 28100, 72121, 55771, 45323, 56161, 764, 62543, 54311, 338, 5097, 43790, 52388, 11476, 60858, 55551, 33858, 19584, 22243, 66198, 52863, 35843, 1999, 11168, 29734, 70340, 59553, 11468, 22102, 18852, 73351	yes
214	30412, 23817, 278, 5413, 46460, 29091, 18175, 41836, 17019, 17889, 59080, 11664, 37749, 58717, 25273, 25176, 15966, 66196, 74319, 73721, 12266, 33284, 24841, 40990, 49624, 60506, 35680, 63995, 32669, 4043, 29732, 38802, 50702, 19351, 50385, 17778, 18272, 44087	yes
215	53686, 13052, 31986, 1103, 12863, 42306, 57344, 1948, 64063, 16635, 8870, 69198, 36953, 44021, 7370, 66618, 60442, 4326, 68817, 6064, 31891, 35218, 14485, 22410, 6571, 62303, 15911, 60691, 45760, 5951, 64466, 10155, 21600, 55126, 32689, 67872, 32038, 18632, 67284, 28880	yes
216	11496, 22732, 1721, 42983, 70224, 3664, 55652, 66800, 22715, 73059, 41533, 63961, 31506, 50891, 24088, 59677, 63934, 42824, 16693, 29511, 69813, 22387, 14653, 57412, 20536, 59775, 6364, 33707, 54058, 10469, 1723, 42387, 42159, 4685, 52187, 41848, 30070, 14852	yes
217	32781, 57016, 59988, 46282, 50014, 45290, 72979, 12822, 5183, 32949, 44618, 47457, 67324, 24547, 8054, 30601, 4264, 41077, 50346, 45788, 10577, 19638, 51755, 34262, 19698, 50485, 65737, 7764, 45324, 21441, 33392, 16598, 12124, 71272, 32849, 54865	yes
218	63756, 57045, 51254, 72915, 43470, 56116, 2504, 44027, 18390, 67766, 60145, 39751, 17170, 19300, 10020, 58483, 74632, 48346, 36791, 12056, 27639, 883, 65430, 14521, 42866, 31462, 14311, 29901, 29014, 41696, 8162, 35190, 19101, 13416, 24469, 21836, 10780, 8513, 18569	yes
219	26189, 6639, 34714, 17061, 60978, 1506, 4097, 17915, 36401, 45360, 73620, 7346, 72466, 12794, 21878, 51142, 10466, 13727, 58919, 29639, 66726, 63000, 17965, 47588, 8670, 45401, 39067, 54450, 18, 10068, 46493, 12241, 35217, 18907, 3488, 37695, 8776, 25656, 74657	yes
220	68723, 61819, 25284, 62234, 21357, 65003, 35884, 62101, 23211, 64045, 7244, 18077, 19463, 66426, 58116, 1090, 45284, 47290, 43243, 73868, 47587, 50181, 57161, 49908, 46249, 71655, 28857, 34892, 47424, 13362, 45593, 44365, 71254, 29736, 50536, 22632	yes
221	35059, 10763, 54367, 65966, 42920, 46443, 31699, 57934, 44726, 18125, 8586, 10093, 33638, 34025, 73422, 6794, 28306, 19250, 54188, 9185, 55611, 29387, 67289, 1905, 17651, 10295, 47072, 548, 69601, 14626, 60610, 17257, 20830, 71521, 46744, 49020, 10713, 47258, 64391, 240	yes
222	677, 17182, 33371, 42541, 13184, 72532, 63593, 55347, 64394, 36191, 60035, 71397, 24483, 57658, 40165, 43794, 65095, 65778, 59215, 43246, 10226, 12569, 35926, 36256, 51432, 35450, 11398, 56854, 33736, 73289, 64372, 25144, 74606, 54206, 35388, 5352, 36518	yes
223	40052, 27146, 23521, 57583, 48943, 73704, 51849, 12378, 19278, 18397, 11461, 62765, 72545, 38344, 10999, 7482, 65029, 6102, 52815, 66897, 11686, 13010, 73858, 67237, 19952, 22665, 73244, 2706, 4857, 42614, 41940, 12490, 4725, 23240, 4363, 8167, 36406, 4303, 53164	yes
224	53891, 35871, 26158, 58131, 20725, 22664, 66914, 25770, 16466, 23142, 46508, 54835, 5575, 56647, 36547, 33090, 10122, 29199, 53043, 62246, 8170, 47780, 72211, 70502, 17375, 8206, 34286, 19767, 73746, 29138, 54161, 65463, 42681, 67627, 52317	yes
225	4188, 48409, 51872, 54712, 35627, 9069, 71450, 52283, 24384, 19223, 45588, 60078, 8175, 40488, 35321, 51853, 22167, 5513, 43791, 15447, 445, 24366, 29329, 8400, 35153, 42667, 56868, 23687, 33511, 40088, 72568, 9414, 35690, 32910, 55422	yes
226	42780, 1523, 8348, 59051, 54637, 58814, 46199, 68249, 4872, 33879, 34675, 38715, 45596, 67454, 39382, 2812, 19195, 35301, 29176, 68615, 27806, 45424, 46310, 67347, 46823, 63555, 31166, 20936, 47892, 22094, 13934, 56389, 9272, 34886, 34279, 7382, 57727, 35845, 10728	yes
227	61225, 39279, 6208, 39632, 64089, 59569, 1276, 56153, 17270, 6181, 8313, 61298, 72872, 2040, 58145, 44177, 24283, 54126, 12141, 66050, 56716, 33138, 16853, 30033, 74418, 71744, 48021, 64296, 9082, 69446, 64895, 41770, 72980, 3929, 73175	yes
228	57538, 44282, 65039, 18906, 47978, 67615, 50031, 25275, 58791, 26790, 15123, 67197, 43708, 46107, 3635, 31057, 11008, 58062, 74615, 2013, 53606, 32984, 66200, 57091, 24491, 71085, 20262, 8951, 50, 1489, 5920, 49143, 69121, 29315, 61233, 30240	yes
229	19518, 24385, 30035, 35361, 66633, 20104, 529, 59250, 74345, 29221, 10581, 31787, 30418, 30994, 44052, 52333, 39868, 37282, 15515, 67908, 51608, 7709, 19385, 42552, 747, 9923, 6534, 46181, 1167, 3669, 74314, 73815, 15575, 44217, 39346, 15077, 1670, 65602	yes
230	23883, 58957, 55672, 74285, 10291, 63353, 64532, 34061, 35264, 65453, 70038, 24148, 44219, 24111, 73860, 67613, 59581, 16440, 39715, 68352, 5874, 43755, 15321, 26528, 58126, 41128, 71989, 6914, 62217, 19325, 18435, 70297, 30383, 18315, 26352, 65197	yes
231	67931, 10900, 23597, 20670, 2669, 16765, 38231, 58910, 1594, 10072, 66685, 7644, 54609, 67753, 15606, 15823, 1275, 22867, 72242, 2820, 22609, 25325, 50674, 57462, 63306, 9511, 18214, 8298, 43711, 48041, 47497, 74148, 51574, 39426, 64692, 74159, 35539, 67606, 48290	yes
232	46155, 3048, 48909, 64679, 10793, 33722, 57239, 2177, 50632, 31111, 26925, 16432, 52416, 64201, 37918, 46901, 8606, 26541, 62540, 60161, 30365, 43554, 57685, 68800, 34407, 67630, 32208, 37204, 52146, 66912, 22346, 22670, 40963, 62380, 66698, 63128	yes
233	50071, 31282, 66308, 46005, 70851, 10257, 50057, 42060, 40533, 8330, 21948, 57887, 8833, 17677, 30124, 44236, 56915, 19743, 28240, 55879, 2134, 69388, 52691, 9833, 65057, 27782, 48929, 27603, 50556, 40061, 63811, 54401, 42315, 28387, 1866	yes
234	47798, 31183, 28, 53723, 25064, 43735, 49139, 2513, 9453, 67389, 14555, 36531, 47056, 53417, 2006, 21185, 42911, 35299, 35387, 34185, 58398, 42240, 42068, 11216, 27305, 63170, 25293, 69519, 27719, 37118, 33077, 23036, 56249, 5830, 26825	yes
235	43786, 24278, 35487, 24836, 16623, 779, 25082, 15585, 15388, 10539, 35788, 29625, 35479, 20616, 62032, 32339, 46041, 25821, 36648, 62417, 70956, 33211, 58191, 3735, 63873, 5613, 21492, 21438, 48607, 413, 70074, 44870, 42016, 59929, 1572, 26325	yes
236	34050, 23149, 22045, 9263, 17238, 68896, 26549, 31648, 15649, 1813, 33842, 25006, 28999, 50172, 29669, 54971, 23355, 48637, 41835, 18143, 72178, 53563, 43081, 49227, 64191, 27301, 70942, 1297, 38389, 64665, 14756, 71079, 12841, 3401, 65645, 48109	yes
237	61999, 40353, 4746, 9971, 471, 6875, 24190, 60080, 30395, 54336, 32999, 48119, 49390, 33006, 36074, 51760, 64978, 42855, 47111, 21469, 52703, 20094, 243, 66139, 58462, 22080, 40286, 18856, 33555, 51650, 25896, 70504, 65098, 59116, 1174, 6218, 21186	yes
238	26761, 10929, 40012, 14889, 65926, 3027, 16494, 28219, 18291, 68609, 47041, 63266, 37556, 13578, 31942, 5660, 6559, 69921, 50070, 27189, 53711, 58058, 14451, 53629, 23384, 59034, 25480, 14936, 71136, 63849, 45825, 55848, 50543, 9435, 51392, 22742, 33741, 31117	yes
239	14674, 1923, 73352, 71339, 18762, 49095, 70559, 48404, 13961, 18452, 72135, 10809, 73738, 26008, 20163, 11696, 27573, 29829, 6052, 36882, 67923, 58916, 49394, 28255, 51421, 35783, 10027, 57789, 20447, 28071, 16686, 17731, 62662, 13718, 3234, 44351	yes
240	72764, 23045, 31313, 1765, 33518, 45818, 66261, 17397, 14759, 34717, 1699, 36407, 55312, 40471, 6773, 72631, 55071, 19241, 71352, 64105, 20436, 29390, 40315, 42711, 61746, 11097, 3153, 74224, 35682, 71384, 57840, 12086, 47224, 2995, 4139, 16814	yes
241	29001, 31991, 20622, 42745, 71477, 49588, 67555, 30318, 305, 34121, 36049, 46775, 35546, 61878, 15411, 54081, 20749, 51439, 49199, 60798, 38654, 26814, 72607, 1325, 18423, 1977, 69124, 58432, 59682, 46925, 53910, 7637, 48708, 56127, 52535, 29556	yes
242	66338, 62787, 61983, 65998, 49008, 50555, 6844, 63452, 26252, 61317, 71931, 23420, 6371, 56763, 62499, 7552, 20815, 7976, 61522, 11514, 18638, 1341, 52559, 49338, 34170, 27996, 67154, 66734, 8832, 40228, 32136, 64460, 36852, 43208, 3596, 37906, 34687, 8177, 73584, 10708	yes
243	62753, 17979, 3491, 26254, 47475, 59905, 24482, 18174, 64235, 3518, 57907, 15589, 32728, 32558, 70383, 41186, 36112, 3850, 70280, 36976, 51291, 57113, 26784, 65551, 31040, 70434, 52751, 15661, 47600, 27031, 24352, 10017, 16437, 34085, 47840, 70391, 41004, 34737	yes
244	49531, 18764, 60864, 44419, 45152, 2912, 15567, 21683, 10799, 47364, 63169, 49977, 58789, 73586, 20458, 11713, 13621, 8682, 47524, 27120, 19467, 60567, 11263, 38196, 5291, 49128, 10739, 57601, 47533, 28140, 61375, 4289, 69342, 62736, 21654, 23602, 44626, 23076, 37761, 41163	yes
245	55046, 24805, 70875, 65055, 47857, 37178, 16310, 11271, 35689, 60767, 61057, 28313, 8980, 60564, 43386, 64987, 45490, 8634, 69255, 59487, 49205, 66724, 33986, 56998, 43826, 49944, 59252, 24277, 54801, 47693, 26495, 73737, 63964, 31444, 44126, 45482, 73509, 44942, 66417	yes
246	40824, 33428, 40233, 3967, 43979, 20559, 53884, 69736, 49979, 47810, 69744, 23189, 50893, 67538, 16345, 70022, 11019, 57692, 565, 57289, 53088, 7911, 61527, 3649, 16764, 35914, 10892, 50322, 71772, 54613, 42481, 13840, 4318, 46798, 26875	yes
247	39896, 69677, 65239, 17426, 34462, 48803, 64809, 43356, 34188, 41052, 29642, 49012, 56383, 6104, 30562, 13260, 52466, 64642, 18147, 37864, 24724, 20242, 73234, 48414, 15336, 2374, 54672, 48908, 14806, 17845, 26395, 50797, 2369, 5877, 43186	yes
248	32483, 46029, 31347, 41777, 61910, 22540, 4955, 14189, 10136, 67823, 25726, 74197, 57951, 9006, 49691, 49417, 72194, 50481, 34359, 8653, 12226, 73502, 15825, 5309, 70515, 73581, 52621, 20956, 3536, 50817, 40402, 59156, 43039, 6043, 14325, 34044, 10947	yes
249	32017, 1088, 38513, 18039, 68271, 46929, 24793, 19333, 53090, 58562, 26364, 12646, 66310, 12321, 37439, 70174, 20513, 22131, 34638, 14832, 18188, 10162, 35137, 51973, 49010, 66579, 18576, 13856, 36662, 13339, 34684, 64547, 40788, 35043, 32485, 48567, 67588	yes
250	8192, 19858, 66353, 13463, 45433, 64423, 62966, 2218, 57952, 46840, 11656, 31617, 66153, 1178, 42522, 43835, 65327, 52589, 69517, 66255, 25016, 61655, 14084, 11034, 60158, 10429, 27315, 29687, 34640, 29696, 51506, 59416, 24748, 27012, 44641, 63507, 55881, 48754, 54103	yes
251	65061, 5165, 61939, 4230, 67299, 73113, 54757, 4038, 52190, 42768, 70159, 27007, 59341, 28922, 36220, 72534, 58484, 73796, 2107, 59041, 18681, 55640, 27039, 25874, 691, 41173, 1240, 57365, 53744, 36247, 40582, 54653, 69393, 16843, 51251	yes
252	48839, 73501, 43594, 3228, 63605, 13004, 58416, 40180, 19152, 71643, 35978, 52028, 47237, 51693, 39497, 46099, 24759, 47610, 69930, 46373, 47011, 11626, 30511, 47396, 22711, 63190, 31600, 17020, 52681, 39549, 34681, 38733, 11819, 43478, 24679	yes
253	8326, 66554, 26357, 65493, 57888, 52601, 64477, 50377, 57884, 44955, 21592, 48506, 63062, 4221, 15027, 5303, 29818, 7655, 58766, 72316, 15611, 33357, 17177, 11569, 12568, 24279, 34550, 51017, 66549, 15133, 13072, 28130, 12559, 41901, 53129, 40673, 44289, 35291	yes
254	35466, 43071, 55176, 53335, 22462, 47515, 32934, 32252, 68538, 15566, 26141, 17896, 49781, 7083, 2210, 11672, 49486, 37561, 33771, 19245, 47094, 16296, 38854, 40035, 10260, 16219, 34248, 26513, 25752, 51322, 44500, 4451, 74368, 47660, 59823, 29811	yes
255	38489, 31829, 8763, 3007, 68405, 58852, 39654, 7920, 46022, 21835, 56532, 57418, 50010, 40291, 44230, 62769, 55295, 67653, 50140, 62153, 51584, 67936, 67679, 52883, 23173, 18374, 55831, 20280, 45238, 17423, 28188, 31596, 1065, 18841, 74355, 47217, 39860	yes
256	2050, 58751, 35277, 50027, 73233, 64215, 9981, 17235, 15454, 15613, 5093, 73027, 27493, 45640, 47070, 34562, 37863, 67277, 11701, 71731, 49169, 70480, 68034, 48397, 21332, 43517, 36895, 17815, 18213, 49633, 41666, 4374, 6224, 3210, 43669, 73436, 21919, 71181, 33028, 41311	yes
257	60921, 588, 28129, 60065, 4612, 43672, 40041, 60041, 50356, 15734, 17457, 55823, 11359, 31009, 44283, 48201, 61186, 19802, 32745, 3741, 46789, 4526, 73366, 12642, 10215, 47361, 62527, 51164, 19030, 62355, 60268, 59141, 58292, 56457, 31340, 46207, 19072, 4951, 10192	yes
258	46571, 13785, 38487, 61864, 61732, 61482, 54077, 56923, 69565, 17550, 37744, 41922, 25232, 4645, 72238, 2396, 5717, 35288, 59668, 45525, 65389, 37705, 3057, 9839, 6929, 66723, 57333, 21126, 71346, 16744, 32356, 61079, 48776, 42732, 58411, 61499	yes
259	28178, 14614, 1433, 24069, 45340, 9379, 63183, 12572, 73165, 73647, 16735, 23504, 54156, 27399, 3769, 1122, 53232, 40941, 31459, 11455, 33455, 48976, 8454, 35829, 976, 11189, 31983, 51765, 56600, 3341, 30019, 73688, 55169, 16718, 47369, 29819, 49208	yes
260	69657, 52257, 41257, 8359, 4753, 72226, 5750, 44779, 8391, 50132, 26056, 60750, 68797, 51949, 15259, 73940, 67483, 34838, 29391, 37149, 6146, 65066, 54187, 14408, 41570, 26713, 2124, 55893, 28547, 19117, 4463, 17989, 54851, 18071, 21087	no
261	18465, 24632, 67113, 64093, 53037, 28136, 51240, 64823, 51906, 54957, 67480, 26025, 46669, 46846, 44256, 10300, 53768, 48890, 2717, 69818, 27600, 37937, 13245, 10157, 56437, 28881, 20558, 46381, 24072, 11524, 45972, 45653, 54320, 50839, 55101, 41019, 65858, 3506, 24891	yes
262	18709, 70200, 27816, 66763, 1844, 69488, 60455, 36294, 2237, 68802, 66374, 7672, 4842, 28684, 58869, 71409, 58481, 39882, 31807, 6110, 45455, 58606, 52566, 40381, 21348, 48009, 62894, 39258, 70449, 25104, 15438, 37743, 16278, 32231, 24544	yes
263	49099, 63556, 12530, 42821, 58656, 2808, 40784, 30577, 14516, 11115, 39429, 4684, 21690, 5726, 74280, 16394, 8415, 19523, 69864, 7528, 3549, 54756, 15279, 4136, 35655, 26041, 68531, 7617, 61519, 4236, 57466, 38189, 60218, 11103, 60606, 40047, 19975	yes
264	6101, 55393, 63629, 71596, 7143, 7260, 54929, 33066, 17765, 47133, 57717, 1850, 35346, 45117, 10891, 56029, 51480, 47337, 65699, 58920, 71749, 25940, 21398, 20169, 57962, 19846, 40202, 12778, 34719, 52497, 66171, 38412, 34513, 31544, 47939, 51177, 10879, 57155, 520	yes
265	10405, 8026, 11005, 8493, 54360, 25158, 66249, 39693, 48315, 6007, 73912, 32244, 62714, 69262, 9575, 63443, 37205, 30751, 44684, 32235, 30816, 54424, 13357, 13024, 65854, 20768, 20668, 36458, 66020, 12085, 45233, 24578, 11294, 16351, 20252	yes
266	16149, 32158, 68115, 59090, 15509, 27269, 69076, 39047, 52502, 39304, 36004, 31583, 44520, 43706, 18313, 19570, 42246, 39259, 57933, 32067, 28602, 17676, 65275, 25141, 23558, 74551, 33205, 55232, 8034, 3372, 46284, 11651, 72896, 69457, 15678, 6770	yes
267	35305, 59134, 74045, 5639, 26397, 28072, 41415, 49224, 4522, 59047, 15522, 9960, 21855, 40051, 56260, 53172, 40015, 24416, 14216, 30881, 16289, 31495, 26128, 56965, 74357, 33691, 18759, 55329, 6252, 42294, 37236, 6755, 56160, 1008, 28710	yes
268	8338, 64495, 52174, 36920, 31034, 44222, 38719, 37899, 31285, 44846, 25220, 18554, 41215, 29438, 52805, 36013, 53200, 69411, 513, 19759, 69061, 58685, 65847, 64686, 36413, 44292, 39145, 57018, 11239, 7038, 10281, 20386, 20531, 52488, 43286, 53742, 59716, 10258	yes
269	57281, 21513, 51908, 46689, 58263, 14129, 48092, 17252, 66452, 31570, 5822, 7975, 21462, 21979, 33712, 64723, 40169, 6894, 71637, 8153, 28254, 34781, 28058, 50486, 66778, 38043, 57965, 57728, 1496, 52398, 17284, 62825, 15847, 63108, 20036, 55847	yes
270	27528, 56188, 36778, 28430, 21303, 16698, 56173, 33732, 3492, 29049, 31830, 47412, 31988, 38163, 8215, 21099, 34604, 9400, 16011, 13167, 32169, 13249, 21216, 54643, 64326, 72778, 42726, 61288, 27701, 73498, 51459, 62082, 74315, 43000, 4351, 54520	yes
271	20805, 15050, 45772, 4804, 66106, 5766, 27452, 58723, 48872, 40463, 26374, 59125, 72873, 57141, 36210, 28792, 53513, 48790, 48778, 67504, 44823, 6593, 33207, 2191, 41452, 29715, 24557, 193, 4356, 35516, 57317, 4834, 157, 50389, 46061, 49311, 37665, 44450	yes
272	65746, 36869, 35067, 74419, 70306, 57316, 10246, 46687, 63823, 62541, 7032, 48864, 11817, 52941, 7591, 38302, 8254, 37517, 73294, 67270, 36022, 30719, 62413, 59265, 46166, 17256, 47309, 29449, 61988, 47295, 66715, 26934, 9214, 38345, 55426, 31217	yes
273	4692, 8221, 737, 11252, 14751, 1831, 27472, 39891, 2382, 30096, 40814, 35962, 47751, 65673, 42799, 11244, 71436, 44548, 55407, 71127, 22943, 50236, 66640, 14464, 526, 4877, 70334, 66541, 629, 54718, 45557, 51979, 59402, 44914, 51462, 45664, 57734	yes
274	54426, 42560, 47382, 67593, 17203, 47567, 32944, 4025, 61348, 626, 30489, 48427, 60447, 44836, 34284, 34308, 14854, 54449, 60295, 45969, 23250, 50506, 59467, 31747, 69474, 18537, 17179, 73657, 10427, 7787, 61497, 39245, 42550, 58978, 19799, 67056, 60773, 68329, 72046	yes
275	44857, 30099, 27417, 25390, 27925, 38246, 71111, 40663, 10703, 9928, 30017, 25336, 6103, 35488, 36844, 55431, 36897, 71144, 5096, 63358, 16690, 8190, 27967, 12700, 47325, 56155, 74641, 22990, 69763, 15967, 5930, 29656, 15700, 33364, 241	yes
276	70227, 26582, 31827, 2741, 41858, 41819, 50739, 8603, 36653, 25736, 21576, 12981, 2591, 50562, 36131, 72055, 2417, 19165, 45175, 5944, 44405, 12953, 59649, 17385, 51915, 36139, 56597, 65623, 6193, 25079, 49540, 39742, 19407, 66915, 19494, 7237	yes
277	4166, 11991, 33181, 23285, 62987, 3396, 66944, 8463, 63826, 43463, 47613, 10782, 59815, 30272, 60150, 65984, 7595, 68926, 27874, 22348, 10989, 41357, 40864, 19724, 53286, 40017, 61419, 61720, 65624, 5348, 53927, 64051, 28703, 10950, 37888	yes
278	57693, 38694, 23705, 57153, 31386, 73971, 33501, 53916, 9478, 18206, 66330, 38994, 71528, 36816, 21386, 41698, 18317, 70927, 38508, 9273, 44590, 48913, 74585, 35566, 17831, 32604, 52639, 42517, 14824, 52464, 41113, 23830, 14235, 31335, 6450, 38348	yes
279	31227, 70309, 57118, 5429, 67572, 46104, 46413, 13588, 56616, 43202, 62667, 31710, 8161, 35943, 6012, 69847, 50822, 19586, 35513, 25853, 58487, 54532, 15306, 13736, 42804, 17114, 67251, 16658, 32596, 21119, 319, 73997, 1687, 37314, 2931, 61360	yes
280	73116, 43092, 33556, 69907, 32097, 13501, 41532, 15194, 18373, 4475, 58558, 14165, 65388, 16097, 63895, 47251, 70487, 7473, 18022, 27853, 71621, 20102, 20968, 53792, 40884, 28929, 35543, 12819, 27114, 61075, 71179, 10981, 65122, 5341, 52949	yes
281	56943, 57331, 56936, 2984, 37167, 1674, 19929, 48576, 27539, 5485, 74423, 34186, 65615, 47718, 13687, 73655, 62436, 17285, 73910, 49581, 34352, 26247, 9252, 42718, 1457, 71206, 24050, 68062, 62611, 29189, 14219, 68663, 24626, 37103, 3778	yes
282	14369, 71721, 43572, 8475, 46562, 8353, 70328, 66962, 74337, 49590, 27294, 11076, 38159, 20575, 42863, 67589, 72885, 49613, 15580, 53550, 71199, 42351, 3266, 34931, 27927, 64636, 40712, 40829, 43310, 15478, 67095, 1696, 50579, 63081, 58247	yes
283	46890, 51366, 11958, 33340, 72892, 47084, 57193, 12714, 17072, 73510, 1922, 62343, 34865, 41503, 6856, 31409, 67260, 15656, 16265, 61548, 11785, 74158, 17420, 27593, 31497, 65252, 60889, 35195, 24809, 64380, 50882, 73998, 42507, 53650, 50700, 32637	yes
284	44261, 29889, 47352, 10147, 36679, 10963, 60813, 27184, 38199, 3616, 20508, 36749, 36725, 24912, 32137, 32340, 22215, 11864, 45519, 41897, 41521, 29257, 13749, 19742, 33636, 68403, 61550, 37570, 43099, 11147, 40356, 55495, 9798, 64177, 68019, 17149, 72670, 72678	yes
285	49065, 32264, 27209, 63592, 18227, 1399, 10769, 55891, 73022, 24654, 16228, 22020, 50757, 7070, 69106, 33530, 6038, 27402, 54943, 54590, 73723, 28846, 47901, 50745, 67943, 24796, 29293, 45685, 30200, 50268, 30362, 7442, 5397, 68453, 63153, 27421, 54570, 58996, 23811, 29024	yes
286	54753, 45769, 44860, 63863, 12571, 65074, 37679, 9399, 64625, 15470, 15152, 17309, 15843, 58249, 16451, 48258, 55649, 54786, 38358, 65514, 45440, 74328, 15787, 58372, 18262, 27407, 26978, 26422, 66096, 63355, 39423, 39815, 59615, 61211, 37741	yes
287	32545, 62085, 50581, 52328, 68647, 2307, 19168, 6344, 51653, 48559, 53692, 56390, 54372, 54601, 25113, 26711, 25991, 27116, 19607, 22829, 71057, 68459, 8016, 1656, 23995, 6174, 18736, 12596, 23956, 7647, 39890, 40455, 35337, 61173, 27894, 37074, 50491, 11578, 47399	yes
288	7072, 55035, 62567, 56450, 37577, 22449, 28225, 6726, 14821, 41157, 11746, 72653, 43354, 31722, 61431, 37607, 1917, 32257, 54866, 67084, 57930, 13140, 3070, 59496, 44148, 71219, 26117, 72960, 9707, 69913, 28309, 31513, 20915, 6343, 39685	yes
289	10130, 56576, 60303, 4947, 56841, 53398, 25450, 68165, 67654, 10492, 11397, 34124, 62119, 6890, 41871, 26204, 15740, 18099, 47608, 67309, 12992, 56950, 69317, 60102, 38026, 68238, 10910, 13845, 29295, 69755, 63383, 38278, 71966, 3203, 13587, 67539, 22307, 65246	yes
290	55538, 4691, 67804, 18418, 20789, 1560, 33412, 28315, 52376, 69639, 37632, 33794, 23859, 7242, 43285, 50384, 36421, 74506, 72727, 42662, 18056, 32144, 42645, 12384, 6080, 15244, 73520, 56564, 21479, 48700, 32525, 66634, 34334, 24508, 31926	yes
291	57708, 16605, 11442, 42155, 14067, 10406, 51531, 44900, 39054, 4203, 19205, 7460, 54028, 2202, 26051, 64110, 17047, 27179, 48681, 30321, 24338, 36450, 1787, 35521, 43860, 48464, 30541, 59912, 70366, 6345, 57814, 24330, 36803, 34135, 27577, 42452, 33243, 30329, 20205	yes
292	18457, 36271, 9449, 59821, 17434, 59509, 27991, 26466, 65874, 63877, 67148, 38744, 58152, 46018, 65534, 33686, 59124, 22538, 54189, 71594, 27619, 67271, 2970, 57015, 60622, 69248, 73034, 14056, 71678, 28800, 66238, 10377, 2584, 26445, 43098, 24145, 1914, 29835, 32079, 33644	yes
293	25947, 7309, 21279, 70967, 39691, 16756, 70218, 47058, 35105, 40810, 41772, 19125, 41964, 24001, 53943, 65195, 12508, 713, 4276, 7690, 47821, 64982, 32854, 34567, 239, 10551, 21206, 55532, 34969, 10232, 6230, 9384, 6671, 71705, 49401, 37774	yes
294	56464, 9638, 54247, 19179, 26646, 54134, 18436, 26406, 53573, 70800, 41814, 4425, 15081, 72633, 12155, 8423, 37272, 54818, 20720, 44639, 23818, 12347, 23762, 59484, 35062, 2699, 60531, 8465, 39859, 68077, 39233, 13965, 33191, 67585, 11410	yes
295	47932, 18960, 10314, 44681, 48596, 6577, 22601, 51198, 3716, 65771, 56529, 29211, 49115, 41510, 44349, 43058, 66534, 31300, 4718, 73117, 5321, 54904, 35245, 26665, 15641, 48525, 54032, 10168, 48863, 72997, 27708, 21209, 61496, 22545, 45270, 66144, 32870, 37723	yes
296	9957, 37121, 16084, 68042, 47461, 50684, 60119, 11710, 34875, 24161, 73592, 70312, 8628, 15500, 52313, 21156, 58070, 69192, 17577, 71878, 30834, 18994, 30645, 73696, 59135, 22234, 67235, 1130, 4030, 45673, 22262, 36826, 1861, 24506, 16896, 42893	yes
297	27266, 2208, 1448, 44910, 67296, 64803, 67952, 56756, 42630, 37554, 44384, 68376, 52341, 19150, 19512, 39441, 27467, 37724, 50855, 54743, 29445, 62425, 16678, 39360, 22202, 4112, 14695, 31517, 12709, 53324, 58459, 52160, 68144, 39159, 57074, 59777	yes
298	44751, 16662, 69148, 1613, 50845, 52282, 26900, 33988, 72095, 51703, 49439, 61661, 39186, 61282, 61938, 5668, 19113, 53855, 68512, 63142, 68951, 3798, 33676, 14777, 64680, 32764, 14800, 24829, 24, 70997, 69626, 35944, 54067, 65379, 51570, 44519, 787, 28845	yes
299	9944, 53209, 11670, 26405, 50032, 41208, 43018, 61447, 12052, 36586, 70873, 48582, 65708, 56030, 9172, 43679, 21854, 15972, 13761, 61886, 25797, 66939, 65333, 31320, 52060, 40003, 39172, 52496, 39684, 194, 41660, 64186, 35356, 1406, 73525, 29428	yes
300	66941, 58438, 71522, 27006, 13262, 38323, 42793, 59371, 49330, 69107, 70320, 34455, 53365, 54288, 41672, 26310, 29809, 55524, 13242, 67919, 32522, 65594, 37135, 33997, 16214, 70772, 52890, 61304, 50592, 57928, 37376, 72076, 47066, 59382, 30004, 1374, 67188, 3302	yes
301	73069, 12196, 70392, 53300, 23080, 38632, 13743, 55048, 13825, 7230, 9355, 16404, 24848, 44929, 23699, 30910, 32700, 72757, 31948, 38201, 36459, 20355, 48263, 2732, 65738, 49978, 20990, 35275, 36572, 16141, 48787, 70596, 3620, 56536, 53092, 66017, 29608, 57086, 40220, 50709	yes
302	13491, 42298, 70111, 8250, 22517, 49120, 59811, 32802, 31253, 31640, 17053, 46691, 2809, 49536, 61500, 2008, 73810, 45792, 20793, 3344, 62671, 29258, 66891, 27263, 10029, 15225, 13074, 35232, 45783, 44218, 27609, 28197, 70291, 28333, 19758	yes
303	56334, 55566, 17126, 39319, 18338, 47124, 25658, 39295, 45952, 2252, 59556, 39780, 30916, 806, 48110, 37117, 26560, 11619, 46908, 30404, 43174, 29310, 45540, 50670, 34196, 52722, 25116, 23422, 2823, 49460, 35841, 4779, 69328, 3547, 19543, 11112, 5600	yes
304	3221, 32180, 44943, 52469, 61479, 24388, 52651, 25314, 16942, 51515, 54116, 32911, 14772, 8204, 48204, 21445, 59428, 3062, 42021, 66242, 49693, 65745, 29366, 71342, 51079, 780, 54088, 59781, 67743, 26448, 18843, 16384, 63660, 73450, 47636, 4806, 65454, 53970	yes
305	18582, 29053, 9377, 5486, 58570, 60586, 48712, 10826, 72541, 48253, 66190, 20254, 13706, 47502, 50494, 69172, 38829, 72938, 51410, 55676, 55911, 69531, 72935, 65165, 34936, 21989, 13462, 31846, 37826, 32250, 58173, 275, 21613, 31172, 5399, 65159, 43047	yes
306	834, 74218, 45149, 22499, 56391, 19382, 57398, 18146, 62440, 42487, 49831, 31336, 23887, 33823, 41244, 9140, 38734, 6782, 25522, 70080, 37227, 34119, 47089, 32185, 9759, 36305, 55846, 4662, 63149, 18714, 10114, 24097, 67957, 68225, 23950, 7860, 33803, 21318, 31262, 22125	yes
307	72440, 6762, 58897, 12690, 44262, 73924, 54155, 28335, 540, 20714, 59367, 48902, 42961, 70287, 25553, 17234, 17418, 24869, 16602, 28699, 24470, 22423, 7942, 50116, 60029, 59888, 25472, 65980, 15097, 65321, 18223, 32774, 19996, 33739, 31805	yes
308	56735, 55489, 9945, 913, 34755, 39236, 5708, 30195, 3637, 54893, 56069, 62985, 56679, 62194, 37688, 29194, 61027, 26275, 19998, 2166, 37911, 65456, 60812, 7906, 8761, 39872, 39272, 6740, 15437, 27143, 37886, 62561, 33632, 32860, 13721, 7347	yes
309	21537, 6945, 46711, 70305, 64781, 2480, 59102, 14487, 70973, 45015, 47694, 1338, 19023, 44181, 49673, 72799, 62023, 34924, 60687, 9201, 25716, 44180, 33723, 55262, 11547, 11550, 60593, 44313, 43330, 45240, 67175, 32330, 41443, 26479, 32041, 52745, 1901, 60621, 45705	yes
310	50430, 70121, 44089, 67365, 46965, 46968, 71444, 53975, 43395, 74330, 20894, 44458, 32805, 61192, 8388, 55660, 56966, 8622, 54979, 26241, 14601, 27264, 66148, 50930, 43437, 12264, 23586, 19700, 60936, 29, 40564, 13424, 33398, 27729, 50744, 19667, 55723, 61182, 18866, 14669	yes
311	17934, 5033, 70441, 52482, 47527, 18516, 72438, 65171, 14113, 22860, 14047, 44202, 29952, 60185, 12972, 1514, 53174, 3174, 42252, 42134, 12869, 47236, 308, 5407, 28743, 11275, 25540, 52594, 7437, 57110, 13690, 23252, 6722, 16707, 40890, 32956, 363, 45442, 50281, 72024	yes
312	21782, 67045, 33120, 64122, 63905, 65465, 47950, 27424, 68284, 66746, 49482, 14079, 30003, 34981, 16832, 45516, 64907, 3157, 16321, 40869, 4265, 24815, 50051, 19933, 2380, 1295, 25993, 24158, 25457, 68522, 65747, 71564, 17912, 32899, 753	yes
313	38636, 6643, 41290, 12542, 5808, 20001, 45508, 2574, 949, 35619, 12468, 66157, 11552, 12044, 64766, 10000, 7515, 51590, 30123, 65633, 53354, 33183, 42682, 73254, 4158, 11494, 38371, 29617, 68031, 20118, 14802, 25871, 61725, 10146, 2129, 31510, 31862, 64225, 19065, 42747	yes
314	19640, 16901, 9915, 46894, 38031, 21643, 31024, 21296, 61815, 52002, 55618, 11534, 40196, 30813, 34318, 71960, 19019, 67556, 66771, 71265, 11202, 11988, 64488, 34850, 8598, 31719, 52322, 1580, 70620, 36818, 52024, 4500, 17802, 68027, 69747, 57722	yes
315	57223, 42290, 42656, 48195, 54359, 22239, 60758, 19308, 35947, 71690, 49886, 18737, 73009, 32861, 36617, 48716, 24932, 33265, 17201, 53185, 61124, 48887, 2415, 59986, 56764, 24658, 8239, 4764, 40336, 58206, 5114, 62974, 33359, 9509, 26329	yes
316	20667, 5231, 14320, 8439, 10988, 47039, 4910, 65681, 62399, 21353, 5959, 58579, 63958, 31134, 66656, 49884, 16477, 22269, 59317, 6289, 26222, 31539, 51572, 67844, 25966, 19421, 22059, 41550, 33567, 72890, 57129, 70671, 31907, 12125, 35163, 47032, 15372, 40558, 31728	yes
317	12825, 46643, 37686, 71501, 61787, 18167, 33600, 49413, 22396, 66980, 6863, 48007, 58774, 66160, 29571, 54972, 48229, 60846, 74517, 27537, 30219, 59833, 32804, 60302, 37108, 48624, 54716, 52702, 35080, 15716, 49129, 7688, 38509, 67715, 2832, 68396, 69878, 47620, 17283	yes
318	6433, 21328, 39293, 35659, 34511, 26232, 61195, 46342, 48345, 43527, 15598, 47414, 1263, 58083, 17153, 37591, 72425, 53491, 3740, 14665, 43379, 37278, 28858, 17659, 73954, 44146, 54199, 12186, 42748, 8410, 41212, 7677, 56985, 53664, 46321, 4074, 9420	yes
319	20657, 44593, 53569, 6204, 26670, 26162, 40174, 2035, 54961, 35402, 69680, 71180, 63732, 32100, 15880, 37827, 64048, 48250, 62285, 43095, 71479, 59818, 35447, 10051, 9508, 74566, 66158, 1449, 46836, 1621, 5807, 8938, 30477, 44510, 4874, 29535	yes
320	66737, 59627, 44166, 60688, 19345, 60907, 24669, 66131, 5730, 73507, 48921, 40794, 43416, 69295, 36861, 173, 42802, 711, 65885, 70687, 37088, 53133, 51325, 72995, 72134, 60429, 21604, 24195, 60778, 31939, 41299, 32646, 26331, 68398, 36870, 39745, 46640, 55246, 328	yes
321	63091, 9423, 71854, 693, 7654, 4672, 33429, 8268, 45963, 42069, 15054, 60422, 44118, 34902, 839, 61301, 10031, 34877, 15648, 35868, 8125, 53532, 41059, 32196, 38032, 71171, 62800, 47107, 20835, 70585, 3440, 59038, 1751, 1510, 44952, 73877	yes
322	55272, 24021, 65850, 23620, 70765, 7447, 35970, 4821, 13738, 74409, 8487, 17314, 6813, 30558, 66670, 26002, 60933, 2835, 47781, 51876, 57868, 55967, 62176, 16302, 28772, 20232, 59703, 28569, 5938, 69891, 66790, 46227, 43538, 33368, 53371, 4442, 52213	yes
323	15366, 20081, 48370, 58771, 52724, 38476, 30629, 51226, 38004, 20597, 25603, 48380, 37015, 58521, 24519, 36344, 47281, 45789, 1442, 62141, 9776, 57370, 21178, 64832, 6183, 28688, 25043, 7375, 9291, 25920, 35350, 29788, 57448, 47683, 58497, 29133	yes
324	30651, 37811, 23168, 67759, 49936, 10833, 24844, 1846, 67981, 41420, 50538, 8227, 39769, 58153, 25286, 57564, 63349, 22459, 43147, 59699, 37545, 16544, 21957, 32232, 52425, 4912, 3683, 7086, 60282, 1139, 19939, 36107, 66434, 33983, 5584, 22028, 45828, 53035, 53788	yes
325	56575, 46866, 72384, 9407, 26402, 50091, 39634, 51397, 43780, 15622, 64456, 14939, 30367, 52534, 3672, 17315, 38000, 39053, 2315, 44358, 34120, 41229, 24044, 28508, 5973, 6406, 25772, 54911, 24907, 42446, 64353, 71120, 13951, 9891, 23828, 12653, 23853, 8774, 45956, 13403	yes
326	6072, 168, 1731, 8934, 54405, 59384, 37919, 55745, 59269, 50404, 4782, 33923, 25048, 53922, 31813, 26281, 7433, 19397, 35684, 2606, 15177, 71133, 33846, 26067, 60408, 57910, 72720, 74101, 15682, 875, 74367, 54722, 73228, 66909, 42850, 15609, 26154, 2024	yes
327	30100, 51676, 73018, 1359, 64712, 54874, 47421, 20404, 17414, 26849, 45659, 13958, 34092, 66211, 4449, 45412, 50076, 62676, 6564, 13932, 59087, 18635, 20770, 6853, 73102, 58205, 14092, 26197, 73570, 64533, 29300, 70271, 23212, 29630, 11137, 36253, 53061, 2411, 65149, 36134	yes
328	16246, 62509, 18831, 6651, 60954, 74413, 6944, 9992, 21873, 74171, 30212, 4279, 46960, 29002, 51960, 29569, 10990, 43082, 9753, 40269, 22584, 41472, 12893, 29970, 8988, 1242, 4431, 57947, 13592, 66600, 35670, 19047, 73631, 14786, 27223, 43044, 2065, 573	yes
329	30151, 24511, 25962, 18282, 42406, 15252, 47722, 6128, 11213, 34579, 68161, 43323, 45823, 22856, 53447, 73315, 74428, 32319, 475, 13169, 36604, 63915, 46502, 4131, 16950, 4620, 51997, 36288, 19124, 57297, 74444, 56066, 50742, 6642, 12766, 69513, 22859, 15182, 67445, 6472	yes
330	21527, 13407, 35946, 53237, 13572, 9547, 69997, 46160, 36537, 56667, 34314, 68466, 28663, 70068, 16820, 9602, 2598, 19469, 18446, 30082, 9520, 70869, 60356, 42035, 66526, 53075, 32664, 43342, 6555, 288, 10868, 8877, 68697, 28201, 53187, 39457, 32871, 25710, 22101, 19277	yes
331	37714, 35662, 67849, 67690, 69912, 19824, 14628, 44231, 14599, 8553, 17122, 63014, 15704, 49000, 12658, 61178, 34923, 2196, 18689, 6981, 36268, 64651, 3489, 33650, 30537, 56328, 47564, 46047, 29759, 71125, 43009, 18685, 69708, 26251, 20303, 40563, 37485, 20143, 3324, 37766	yes
332	49489, 59539, 1959, 43309, 52587, 63566, 29587, 39795, 44689, 6419, 53369, 15456, 63681, 73535, 17895, 15987, 72699, 17415, 14460, 65663, 67726, 60845, 58272, 43257, 36198, 60231, 74111, 61143, 42754, 12001, 68677, 6502, 10943, 66065, 47617, 44398	yes
333	53228, 50235, 48461, 11453, 54276, 21459, 41926, 58348, 59339, 58143, 12811, 18604, 67121, 9539, 70353, 8539, 65317, 17348, 2128, 46242, 52782, 27388, 40679, 60585, 1074, 14589, 11611, 38853, 61617, 53824, 8793, 20493, 2698, 60626, 14911, 53868, 35070, 32248, 12122, 17	yes
334	49412, 24310, 28732, 31616, 8760, 31019, 52305, 20810, 25211, 25615, 6001, 52085, 51834, 41188, 41143, 56780, 24600, 23702, 38461, 73654, 3256, 72552, 40194, 70096, 31137, 53271, 32103, 42638, 17280, 17290, 25502, 5418, 61680, 8849, 44664, 12824, 49658, 4745, 55302, 43119	yes
335	46860, 27767, 60671, 66963, 58296, 17902, 71243, 22810, 33961, 29058, 22220, 56147, 52690, 49161, 52611, 24358, 58757, 28568, 67641, 73804, 51121, 7470, 70760, 30967, 301, 59515, 2844, 17116, 33807, 70503, 62754, 20817, 64014, 72655, 13847, 37012, 48482, 47702, 21718, 47713	yes
336	39794, 71294, 6228, 45041, 64438, 14283, 47383, 26328, 57397, 66779, 40863, 15760, 13197, 14257, 12063, 24091, 11822, 60195, 44067, 2981, 20495, 62375, 11190, 46826, 22181, 28377, 50766, 45721, 70984, 39417, 51664, 28605, 63460, 40314, 17048, 42583, 40487, 12035, 54586, 18254	yes
337	37780, 33087, 2119, 51756, 5049, 1928, 59953, 63689, 55244, 57724, 65045, 69134, 62056, 9715, 71928, 4904, 49881, 58982, 16930, 26992, 33093, 30357, 41815, 55475, 34362, 48244, 9758, 23618, 20878, 22486, 44803, 35792, 18445, 42720, 41978, 12832, 37130	yes
338	65833, 11777, 45453, 55597, 53856, 57042, 14026, 2475, 30226, 27412, 18478, 25447, 3718, 34152, 70059, 71964, 74290, 56114, 14321, 65199, 35875, 30296, 62783, 26257, 549, 1035, 41399, 13079, 9294, 62927, 26709, 61130, 26884, 16159, 48344, 9567, 50577	yes
339	65951, 41435, 48964, 48874, 2880, 829, 43041, 27360, 48277, 13542, 38498, 39725, 51989, 49863, 1132, 40473, 61546, 6857, 60638, 43089, 60492, 42095, 52485, 36732, 51884, 49969, 15232, 55529, 50677, 32453, 18296, 34663, 59835, 74266, 53358, 68130, 3527, 1807	yes
340	15479, 47495, 27344, 55250, 62610, 37166, 13422, 55972, 68192, 50214, 57001, 54411, 52336, 13305, 64019, 6823, 52391, 32593, 15184, 63430, 61299, 53196, 20580, 73589, 51181, 5207, 39034, 50093, 64422, 43062, 74295, 44523, 30343, 58965, 6082, 65184, 72610, 16136	yes
341	24085, 66901, 7884, 19599, 2805, 47293, 19287, 48899, 68694, 73999, 46910, 156, 43305, 72422, 6165, 65115, 40362, 51539, 44788, 48978, 34635, 60646, 15742, 31879, 71858, 33850, 67162, 19513, 31104, 65442, 7291, 43899, 56472, 46414, 7615, 58518, 2736, 45513, 72957, 13105	yes
342	63380, 7719, 47341, 41561, 71926, 68063, 12774, 1707, 25969, 66154, 12408, 6283, 51841, 41487, 64260, 71516, 72625, 58137, 58785, 15784, 36788, 42788, 71684, 3823, 44098, 61945, 9560, 5621, 58039, 48354, 37537, 13110, 18155, 64216, 15951, 52117, 15301, 34967, 51497	yes
343	56893, 59659, 71605, 71991, 27845, 43072, 40900, 21800, 40029, 54299, 14061, 30755, 3100, 12756, 59885, 62304, 34765, 2973, 43523, 66323, 47582, 57256, 58810, 5812, 49178, 54182, 59778, 45821, 66398, 39213, 17214, 61607, 55300, 3573, 37805, 3504, 37783, 52670, 36824	yes
344	45543, 55171, 6503, 190, 26208, 64010, 904, 6135, 40513, 32303, 8792, 16603, 5166, 21321, 21687, 16607, 14123, 38634, 22914, 54595, 72500, 39280, 27030, 42138, 40506, 53025, 51327, 10115, 33308, 51265, 45458, 58211, 56144, 14181, 50475, 38658, 52538, 10778	yes
345	54241, 35963, 62786, 17335, 4971, 51602, 5868, 17259, 66185, 64591, 62529, 23652, 55163, 5475, 41714, 2118, 48960, 71344, 46812, 16128, 37879, 60351, 44422, 39977, 67661, 50521, 47385, 70995, 60828, 12119, 16873, 58322, 60211, 21757, 37199, 37778, 60697	yes
346	22005, 37398, 6361, 22359, 30696, 59681, 40678, 10842, 61716, 10087, 68462, 17463, 30644, 28713, 32707, 38424, 68610, 51168, 21652, 47334, 19914, 34762, 37133, 33973, 222, 70690, 67177, 5530, 39728, 23760, 29869, 59065, 59514, 36189, 6423, 4297, 3335, 22570	yes
347	55109, 17557, 8495, 51310, 2753, 21203, 25890, 696, 25096, 40633, 52202, 69591, 71535, 29404, 64415, 63570, 35271, 10089, 50145, 7170, 5203, 63630, 46459, 71743, 29036, 39626, 73526, 70078, 18118, 15705, 24779, 47659, 11193, 46203, 40626	yes
348	50569, 11945, 73628, 42927, 53047, 38266, 46173, 72195, 38974, 38865, 71738, 40272, 69416, 66424, 63687, 52232, 70862, 62103, 25406, 42414, 74254, 5796, 60435, 7410, 21648, 57552, 55970, 16095, 35606, 31672, 44476, 50427, 41803, 19979, 8864, 33860, 18355, 4330, 69809	yes
349	40686, 70830, 66303, 59871, 68489, 439, 50510, 16970, 10021, 69003, 19959, 44266, 64820, 45800, 8011, 36878, 9658, 68911, 47879, 736, 47717, 26540, 26612, 39489, 22365, 50660, 12489, 34340, 65491, 1963, 70244, 57733, 12826, 43168, 73439, 7944	yes
350	12029, 30568, 24353, 39529, 13570, 65780, 16397, 30461, 56948, 37694, 56380, 47844, 41334, 25089, 38357, 59462, 71565, 59477, 74484, 51994, 72903, 37400, 5517, 3231, 24596, 22508, 61616, 54370, 73857, 11955, 9135, 49748, 17521, 7568, 27844	yes
351	68061, 32447, 35113, 33118, 19192, 69854, 74582, 60212, 9362, 56927, 49546, 49059, 61135, 22491, 16431, 37648, 11307, 41135, 41560, 31191, 70228, 9100, 12211, 18596, 48597, 6623, 14738, 3329, 56651, 56955, 66290, 33339, 65652, 14708, 66605, 72716, 59709, 42242, 58650, 23196	yes
352	56310, 62211, 39139, 11087, 22771, 30764, 64507, 36840, 24286, 63381, 14726, 39337, 73391, 65917, 6035, 31045, 19754, 2834, 16375, 40254, 20561, 65011, 56736, 9466, 14017, 30351, 33831, 64382, 3814, 5055, 19132, 60882, 37331, 27905, 60574, 5623, 32341, 42241, 13971	yes
353	68970, 64307, 35721, 70201, 55018, 28257, 24981, 41074, 21837, 34531, 70639, 29079, 23864, 40261, 43599, 25363, 12207, 40504, 13401, 37707, 21453, 56847, 25657, 29303, 32213, 57237, 44665, 32080, 48014, 22004, 42975, 27547, 587, 57262, 12842, 55041, 49421, 42567, 50523	yes
354	53666, 48822, 21913, 69462, 19461, 70016, 17837, 66329, 42238, 39475, 19104, 15901, 57186, 48157, 72590, 31977, 12412, 35862, 46914, 31693, 54919, 2900, 16150, 37246, 7009, 46767, 41796, 70231, 36452, 49838, 23465, 61668, 4498, 53391, 52241, 6780, 72603, 18800, 71554	yes
355	6928, 74232, 1596, 68374, 63550, 67530, 32994, 64074, 29389, 55633, 16147, 57630, 70602, 22424, 41683, 31185, 53914, 48545, 23872, 47184, 20566, 39998, 2452, 51286, 65597, 55182, 61843, 41948, 31389, 32603, 18753, 8152, 17697, 68560, 16478, 43824, 58364, 65809	yes
356	2069, 16266, 69469, 67449, 25506, 50169, 43910, 5108, 2288, 26022, 66663, 16733, 7321, 33610, 42917, 30005, 21980, 34710, 45161, 23978, 67222, 39, 47386, 47777, 9842, 21512, 51426, 43660, 38727, 2495, 69449, 25440, 74611, 51748, 7018, 3975, 5336, 50712, 41562, 12357	yes
357	41921, 5740, 5632, 9932, 2087, 64868, 39284, 70405, 70445, 28043, 54707, 57626, 59831, 3028, 63215, 15560, 26782, 59313, 50942, 36454, 61169, 31120, 43978, 39281, 55461, 5942, 40507, 1057, 709, 55230, 24767, 4726, 39645, 66732, 18618, 24208, 43803, 59076, 22834	yes
358	36916, 27634, 63677, 39534, 45784, 37453, 35307, 57811, 11748, 43712, 26683, 73367, 6946, 34908, 56449, 2296, 73208, 41309, 12255, 61285, 54935, 23343, 71634, 14780, 59329, 4200, 35392, 7494, 34448, 68902, 4866, 25575, 54600, 65205, 51307	yes
359	3881, 38759, 50489, 50611, 25132, 39810, 578, 47630, 13227, 40985, 59021, 4855, 56993, 18228, 12553, 31766, 40099, 69745, 56978, 33921, 10309, 2051, 28161, 51108, 22592, 53590, 10003, 18180, 10722, 20535, 7333, 62937, 27629, 65336, 31676, 52010, 59013, 57056	yes
360	53907, 69249, 39834, 40345, 16779, 16761, 6055, 20464, 40832, 26554, 54768, 53396, 70061, 38665, 14615, 49621, 30706, 44506, 11790, 47870, 56237, 17791, 72913, 66380, 37815, 54543, 19196, 35147, 41126, 16518, 34918, 68956, 33035, 61453, 4271, 70753, 18589, 64209	yes
361	44432, 11959, 19495, 66599, 23964, 45863, 65545, 66080, 7956, 67666, 56288, 12876, 63307, 55621, 19901, 72606, 61015, 13858, 15534, 6495, 6305, 45236, 63989, 13473, 17536, 5978, 452, 26830, 36996, 24833, 29240, 29890, 26783, 47415, 55399, 56270, 29891	yes
362	62581, 4637, 15192, 2084, 10278, 40591, 33839, 73380, 22696, 66245, 38075, 8669, 1620, 42503, 14456, 64056, 41585, 12952, 40384, 63862, 74433, 34495, 22554, 57848, 59520, 23512, 50878, 44950, 25200, 13653, 19757, 67077, 55328, 66529, 53639, 5422, 61239	yes
363	73500, 39460, 56507, 46708, 63790, 56162, 47989, 46593, 11254, 46682, 12960, 72143, 24194, 61596, 50515, 35363, 34643, 23625, 59902, 21928, 64403, 59938, 55814, 58693, 33934, 507, 10188, 2542, 63983, 41524, 66512, 11251, 58935, 33338, 21383, 40085, 36392, 57307, 19400, 22544	yes
364	51660, 9887, 29444, 72762, 55644, 65508, 10186, 43560, 27630, 60466, 52766, 47316, 35865, 63327, 59921, 14292, 9336, 73373, 35647, 30599, 70989, 5572, 55265, 3580, 74534, 50442, 32630, 12488, 73705, 49757, 26710, 30013, 1369, 40348, 50733, 38351, 36019	yes
365	11415, 15012, 33711, 65294, 36213, 73191, 42175, 6245, 67103, 16922, 21901, 27564, 28423, 6484, 59506, 46168, 31749, 53901, 55930, 37878, 55478, 39107, 25934, 23313, 47532, 6318, 32913, 53588, 62969, 48808, 16641, 43086, 25023, 70440, 46276, 30154	yes
366	36242, 24719, 30535, 69881, 58951, 13317, 71031, 71407, 34159, 16515, 33017, 50698, 59761, 48694, 18342, 37392, 11384, 43055, 65934, 57979, 13009, 55136, 70511, 11077, 2778, 21102, 32464, 61792, 12656, 37110, 20325, 62271, 14497, 68592, 29328, 36703, 5438, 67855, 52039, 72181	yes
367	30210, 34439, 48197, 8924, 65086, 58711, 13632, 40086, 42556, 38322, 62354, 4114, 34667, 29016, 9920, 72118, 62156, 35237, 50758, 3715, 48094, 3414, 47202, 12804, 11745, 45283, 26193, 45373, 32069, 13348, 5662, 51751, 25928, 23279, 9836, 765, 55267, 21710, 66436, 10606	yes
368	61715, 40241, 27092, 10540, 69119, 3833, 38428, 64696, 10373, 17830, 39955, 2530, 54548, 64041, 18572, 689, 15103, 3417, 20532, 57788, 26862, 63545, 10882, 36744, 57691, 23372, 67670, 70315, 9487, 32557, 55185, 43232, 70128, 67527, 43428, 2724	yes
369	71958, 31279, 13246, 60816, 46082, 44035, 15463, 16660, 14921, 17584, 57123, 31806, 74607, 62637, 46989, 35729, 7794, 19014, 71037, 74198, 73317, 25140, 2625, 69927, 58634, 4794, 63240, 60970, 63700, 19745, 41078, 37364, 16934, 15842, 59070, 44423, 36351, 4029	yes
370	26114, 38287, 73898, 7982, 9940, 32721, 35676, 53277, 48337, 23491, 5094, 63540, 17271, 51055, 25485, 11884, 12028, 54657, 47132, 68397, 34769, 41892, 28677, 38383, 32202, 37883, 44205, 38314, 20674, 15293, 49920, 12723, 47731, 61562, 69631, 63213, 56364, 14736, 36089	yes
371	43494, 17588, 35857, 41953, 64106, 1466, 59841, 11356, 48783, 41256, 32373, 51375, 35099, 37750, 46296, 24450, 45696, 24052, 35129, 55546, 35632, 55181, 72970, 6013, 47261, 11088, 66429, 19692, 7210, 5573, 56675, 57866, 28073, 12753, 46628, 37862, 13692, 28447	yes
372	42880, 63990, 55894, 60473, 16755, 40545, 21688, 72898, 64259, 72217, 21326, 46294, 26425, 22409, 40246, 41429, 59149, 10711, 66695, 70443, 17819, 36926, 28036, 28974, 6071, 50469, 23488, 53909, 10170, 48130, 39146, 16414, 22530, 48741, 26715, 70455	yes
373	28952, 58472, 47748, 54186, 52510, 16033, 30450, 26094, 61341, 57679, 28629, 72691, 32391, 26100, 25002, 60008, 39594, 62315, 39310, 19944, 14739, 50497, 48336, 39914, 28046, 74649, 59483, 50812, 26166, 32732, 45071, 5063, 55405, 22653, 13562, 22277	yes
374	8898, 55858, 72611, 69838, 36927, 27107, 22256, 29619, 1420, 57315, 9660, 2560, 17814, 59924, 22109, 53403, 2961, 53426, 61485, 23063, 21229, 668, 68656, 68745, 7338, 61171, 33777, 47729, 16043, 25073, 33345, 25128, 48812, 40371, 10290, 57148	yes
375	31851, 38397, 57124, 28023, 11783, 70352, 51094, 17811, 65938, 63971, 55950, 9695, 20204, 73443, 43368, 58744, 27073, 61621, 51963, 46179, 8785, 44039, 45895, 7633, 49147, 59450, 67584, 7551, 57654, 57138, 24535, 28553, 41752, 60980, 21369, 68937, 19321, 31147, 65826, 16781	yes
376	52258, 9679, 46456, 16548, 27911, 42187, 67660, 45166, 12410, 33787, 35141, 57003, 64614, 36886, 31691, 18508, 42838, 32801, 56779, 35544, 6380, 23581, 33506, 16845, 73043, 38625, 31895, 28415, 62702, 46392, 55851, 28019, 16457, 68950, 1405, 62162, 64670, 61544, 61738	yes
377	32594, 65340, 4126, 8189, 61791, 37965, 66551, 63834, 7879, 34464, 33890, 71161, 11526, 42089, 73870, 33639, 14868, 36618, 50110, 37391, 6848, 37972, 808, 6804, 18863, 27602, 41495, 67557, 65956, 69668, 12363, 18682, 22294, 70388, 41340, 14957, 5338	yes
378	39858, 63496, 19639, 26557, 36355, 31442, 2568, 29173, 74093, 4225, 73006, 6516, 9048, 50237, 27995, 18926, 62645, 60720, 24499, 57837, 72272, 34365, 43741, 67958, 15517, 73872, 26723, 19268, 64706, 17827, 16513, 9737, 33085, 66545, 48814, 45697, 64355, 28702, 47880	yes
379	57336, 43580, 699, 42329, 45201, 28336, 70427, 55996, 44794, 43157, 32864, 41566, 22648, 19025, 20591, 11767, 20951, 6567, 7542, 49954, 52955, 34800, 20075, 30029, 50625, 52767, 59513, 42445, 4135, 71591, 57914, 59199, 69858, 10337, 645, 68279, 43704, 2737, 6303	yes
380	13437, 28096, 63473, 1934, 32963, 40178, 50623, 54496, 49064, 10198, 46848, 67932, 19864, 32270, 15638, 49859, 63517, 72505, 72795, 11467, 36610, 23083, 45258, 18112, 6389, 39812, 17631, 11808, 63274, 19095, 21320, 53818, 25528, 31424, 8001, 8163, 7106, 382, 1900, 26810	yes
381	42811, 28947, 60050, 31642, 26382, 47153, 23913, 50072, 15374, 71176, 46906, 14537, 12377, 23467, 30091, 21253, 71006, 23199, 70527, 877, 68555, 23113, 1569, 69662, 58561, 69843, 17232, 51527, 2533, 12513, 36621, 6744, 63356, 62617, 16770, 29518, 22911, 53482	yes
382	13967, 16487, 35920, 15006, 43799, 72025, 47783, 31428, 55488, 31128, 69551, 71003, 29374, 43825, 38203, 22006, 35416, 18528, 26262, 55238, 1180, 53963, 70742, 5070, 39451, 48066, 34399, 19329, 20195, 63859, 28625, 50894, 67052, 59944, 32684, 60600, 43491	yes
383	41044, 74126, 57862, 18287, 63752, 29335, 29747, 36097, 71237, 9580, 70362, 19813, 27085, 61674, 30575, 10819, 4496, 38723, 5711, 55728, 55043, 34251, 32151, 60318, 61366, 42789, 73844, 15748, 45961, 13444, 63282, 50216, 71452, 47129, 52653	yes
384	63224, 33491, 28911, 16532, 25454, 24837, 56432, 16868, 1718, 72446, 68942, 55369, 64407, 24239, 42924, 31233, 41957, 31210, 24076, 26901, 59584, 30284, 41398, 7164, 33537, 54505, 42482, 9079, 8394, 37795, 16758, 19526, 47625, 68065, 6802, 74610, 47476, 38305, 39385, 66403	yes
385	53680, 73515, 49217, 35904, 71674, 22952, 66783, 71899, 10575, 3299, 27975, 69423, 43077, 14764, 70780, 42916, 53019, 26481, 34914, 65888, 15004, 38728, 67907, 42389, 24199, 60479, 37435, 27696, 69384, 41492, 37934, 48972, 14999, 2571, 46944, 50028, 41950, 57422, 1859	yes
386	29733, 14334, 6919, 24556, 34817, 21421, 59010, 51021, 39048, 41114, 34929, 19452, 37784, 63946, 42056, 4343, 20413, 31046, 60393, 46847, 2930, 65138, 60355, 48719, 12418, 21111, 46690, 35417, 3129, 13769, 68968, 64170, 49422, 59522, 15369	yes
387	25663, 10761, 33348, 13497, 68807, 68618, 74560, 16783, 11290, 7812, 2306, 73206, 2869, 11527, 27883, 30285, 70891, 47388, 9794, 74456, 42510, 35591, 24917, 12450, 2234, 58354, 42453, 25470, 35770, 72755, 49900, 54463, 24861, 59429, 67853, 45291, 64387, 406, 67146	yes
388	64322, 618, 4161, 63950, 4198, 65285, 59326, 4152, 41172, 43601, 32065, 28060, 23347, 19233, 237, 72654, 65896, 47796, 12746, 24449, 15377, 8217, 1678, 14581, 17939, 60657, 10556, 24534, 14798, 30349, 12679, 51013, 14094, 73710, 16146, 35255, 58604, 61665, 16076	yes
389	71084, 12980, 44702, 16213, 74644, 53451, 38690, 35311, 61466, 38438, 40667, 58229, 40725, 33475, 5824, 15441, 28889, 64129, 67553, 68749, 27325, 72428, 61891, 40301, 37480, 55797, 8195, 35064, 29380, 32184, 59503, 72105, 60464, 12077, 28505, 23297, 69550, 61981	yes
390	14917, 64390, 59286, 62245, 38793, 31941, 69830, 59447, 34224, 27560, 72539, 59089, 21923, 50816, 11495, 47297, 2976, 71287, 68581, 39017, 47856, 29484, 27182, 3913, 15029, 27188, 55212, 42678, 43585, 11108, 70318, 60839, 44187, 60799, 74500	yes
391	72209, 52937, 64894, 41920, 29662, 19877, 6834, 17620, 34584, 15525, 22649, 4477, 46717, 66167, 27559, 3996, 27509, 46930, 56102, 68959, 59630, 36029, 42280, 62602, 5522, 52731, 26652, 60068, 25857, 29465, 16093, 73363, 35675, 50022, 9442, 50335	yes
392	48178, 13754, 38912, 17223, 26444, 32283, 33958, 33463, 44421, 210, 68889, 1481, 16652, 32239, 72858, 24034, 65143, 62460, 28264, 40079, 4953, 61873, 62906, 51353, 7820, 6179, 60541, 73169, 42396, 65369, 30545, 28546, 34031, 42317, 21031, 4216, 8580, 14840, 4226	yes
393	65630, 58795, 9582, 46053, 54592, 65726, 46318, 34869, 19485, 25906, 11761, 71704, 89, 73994, 39523, 47509, 2344, 29562, 24714, 67459, 59849, 42897, 57379, 69768, 18232, 39396, 54990, 64485, 39915, 28022, 32317, 61032, 71875, 53397, 25142, 25315, 69307, 6313, 34541	yes
394	15219, 33447, 70950, 24056, 50992, 2001, 22755, 38013, 66692, 52427, 16945, 34467, 6970, 2719, 1183, 39617, 9859, 59303, 54918, 69455, 19538, 74282, 22638, 44701, 64151, 25629, 27076, 72783, 23822, 7040, 41090, 60967, 7104, 53767, 53727, 35984, 66094, 3970, 61067	yes
395	46650, 17537, 19662, 55650, 58447, 10687, 9059, 11119, 45092, 1800, 74346, 25229, 64351, 48145, 42790, 47077, 30847, 23676, 47157, 21261, 52299, 16852, 19178, 44775, 60459, 65760, 73630, 21245, 38271, 61691, 43736, 71163, 53575, 54579, 17719, 28778, 13509, 30024	yes
396	68726, 24697, 52445, 73207, 25007, 8839, 68312, 10816, 37908, 28242, 8767, 24894, 62857, 15664, 30203, 37048, 24134, 61392, 55579, 73793, 27436, 6893, 50454, 67128, 14863, 10906, 39324, 30656, 53240, 58641, 36801, 23645, 18518, 70249, 73727, 34289, 10080, 11715	yes
397	21765, 69711, 23643, 14872, 16709, 27442, 36039, 42142, 65579, 34847, 71484, 71939, 28519, 59730, 11711, 1432, 44232, 21394, 41080, 29009, 69325, 13198, 5077, 56205, 27293, 23201, 30757, 7569, 63638, 29392, 52306, 12160, 24969, 1657, 9664, 49895	yes
398	21052, 70385, 44249, 37070, 67799, 14952, 57537, 31611, 60125, 31138, 36645, 57832, 44401, 11693, 63560, 66856, 51362, 32066, 65386, 43789, 63441, 22403, 38044, 71722, 41130, 42125, 11301, 67897, 67832, 29698, 25233, 24086, 73392, 4570, 13233, 61583, 29234	yes
399	45647, 38981, 5128, 46446, 18818, 55910, 9429, 72160, 11876, 49289, 21784, 71755, 17296, 45977, 69180, 35740, 21049, 37633, 44280, 72313, 40339, 57509, 51072, 57780, 32842, 22435, 2300, 2659, 27768, 53690, 20515, 14305, 52458, 40989, 67552, 54758, 36702	yes
400	44703, 74150, 28619, 22152, 54239, 55785, 33132, 7726, 48067, 2939, 71781, 24478, 5605, 38525, 14696, 45294, 72503, 70668, 44322, 57666, 31763, 19741, 7136, 33388, 7432, 23223, 10945, 28689, 67824, 48108, 65005, 6175, 52046, 23348, 660, 16218, 56612	yes
401	11245, 58575, 43293, 28113, 45845, 49432, 26112, 31011, 22194, 27381, 60537, 43954, 72575, 31678, 20255, 30814, 35142, 23751, 46807, 45847, 30777, 9166, 74452, 3537, 9584, 3474, 36434, 28712, 72355, 29834, 10487, 74300, 29548, 25478, 11542, 44317, 65416, 71012, 17241	yes
402	11593, 24788, 13441, 51400, 24577, 70796, 24819, 55208, 22510, 53578, 30928, 23780, 10674, 21823, 41491, 27794, 1460, 12755, 36015, 8810, 69812, 34670, 45922, 24058, 27079, 23894, 43002, 50383, 2508, 19823, 49527, 51445, 38042, 33892, 69143, 66279	yes
403	54362, 534, 13031, 37052, 60981, 45011, 13375, 30498, 59427, 42256, 53654, 32117, 34921, 3064, 71977, 62170, 38378, 31142, 33351, 23595, 27164, 10995, 51135, 30378, 55304, 31241, 31698, 11388, 36436, 69799, 15687, 46560, 59409, 35389, 46030, 68050	yes
404	52842, 12845, 46038, 30507, 69620, 10612, 38899, 16543, 29482, 10861, 67512, 30781, 54420, 14923, 45843, 8600, 68562, 67308, 61003, 30310, 37095, 37096, 31970, 24143, 35249, 68331, 9888, 68957, 70783, 40428, 61142, 73139, 11529, 20637, 22552	yes
405	73374, 52, 20035, 13628, 9279, 62669, 18494, 6532, 53783, 35708, 24373, 4197, 7431, 9591, 32410, 61565, 35313, 72423, 39005, 40053, 57702, 56130, 13283, 40750, 24800, 32469, 50985, 71661, 56377, 44521, 8460, 47974, 2213, 31853, 44862, 13699, 70011, 48016	yes
406	27703, 67704, 58199, 65627, 1513, 46685, 20979, 9705, 67875, 17858, 25464, 37921, 19238, 17343, 12968, 29005, 31035, 59748, 42929, 31566, 35851, 17693, 32226, 55437, 21100, 32617, 4832, 12325, 58548, 38494, 51611, 31485, 39359, 14127, 5953, 38195, 23234, 63618, 71583, 21282	yes
407	48733, 64746, 73681, 16789, 28705, 29171, 64429, 33974, 54377, 19587, 20900, 73215, 16199, 31101, 9113, 40640, 25712, 1298, 66686, 4836, 3078, 41820, 34432, 26339, 20650, 60301, 58701, 40209, 46806, 15806, 72754, 60120, 56982, 9061, 32651, 44332	yes
408	34184, 35135, 44854, 53428, 9924, 27529, 4635, 38054, 69174, 3255, 61412, 57530, 44199, 39716, 44221, 64593, 36911, 20585, 32645, 76, 41099, 9853, 14679, 5016, 51557, 6576, 3896, 54335, 74303, 9636, 58992, 18032, 22737, 34329, 32895, 17467, 50155, 14025, 29415	yes
409	61204, 38211, 53157, 57570, 51068, 13257, 67097, 8663, 35421, 68341, 15722, 34871, 51722, 69567, 59123, 4840, 73210, 9857, 45471, 35981, 12467, 65492, 63673, 9011, 5220, 24673, 70880, 35075, 47228, 71490, 23436, 61640, 67410, 33111, 73707	yes
410	31657, 23016, 40886, 2375, 6620, 71075, 27316, 39887, 56881, 60801, 15017, 57058, 4144, 60770, 43381, 54684, 16987, 910, 42539, 12428, 50509, 66706, 72685, 46498, 20689, 57628, 9421, 55054, 20759, 28966, 11124, 2181, 15240, 15507, 22836, 11195, 27922, 40415, 34191	yes
411	54147, 25053, 30904, 43331, 14830, 2337, 55415, 54640, 56727, 22327, 34701, 51965, 66414, 37852, 19472, 51553, 42781, 11085, 1423, 31684, 30294, 41742, 58963, 4493, 39338, 11276, 24014, 45886, 36386, 18336, 7822, 57458, 23881, 37055, 62226, 60297	yes
412	17320, 376, 60825, 58192, 69951, 38154, 34691, 33210, 63781, 66620, 45312, 21829, 43945, 43346, 48725, 72747, 11734, 64481, 38999, 13752, 9, 27916, 6189, 48985, 63424, 24484, 50842, 34394, 57300, 8808, 69371, 71252, 73623, 8220, 43182, 70173, 49841	yes
413	46979, 28874, 634, 60969, 27680, 5386, 48994, 51285, 58463, 61155, 65445, 36106, 23888, 40844, 15532, 617, 57964, 48668, 27482, 30098, 11594, 37134, 15340, 21943, 63761, 8457, 67312, 7416, 50352, 15227, 7408, 54705, 67066, 19522, 53929, 29923, 5372	yes
414	21274, 57280, 42358, 42379, 29388, 40804, 42532, 25699, 19520, 15711, 2927, 34613, 9092, 72328, 37593, 68924, 62163, 69786, 44589, 29492, 1197, 16656, 45688, 22310, 60648, 39039, 64871, 13711, 11345, 46187, 30048, 63575, 55029, 8091, 29479, 60524	yes
415	60952, 4320, 54897, 64942, 35653, 62189, 23681, 67637, 11732, 21294, 52606, 64189, 59784, 62582, 37191, 56665, 13394, 17561, 67867, 46189, 68289, 56725, 48784, 66968, 26823, 28964, 61598, 3339, 64835, 35353, 47314, 44433, 56505, 8184, 45906, 67842, 21480, 7121, 52271	yes
416	12829, 38554, 44783, 37389, 69521, 47861, 49039, 12576, 728, 36113, 7543, 2253, 1192, 50059, 8859, 65823, 58242, 22628, 28074, 30234, 71314, 31748, 50472, 37208, 52394, 74471, 48190, 52463, 31571, 20145, 39075, 50751, 50195, 19315, 21680, 66672, 4626, 57080, 34746, 9727	yes
417	68360, 28957, 58779, 4365, 20731, 6716, 22976, 20087, 23865, 4534, 17870, 64262, 37296, 68833, 74348, 4150, 26629, 45410, 10915, 38467, 19246, 49671, 255, 63691, 39353, 49512, 17734, 38849, 17487, 59783, 2313, 28044, 7959, 12190, 67106, 43266, 15512, 45221	yes
418	30078, 4104, 37586, 22473, 28168, 51293, 19443, 55014, 954, 8143, 63095, 8328, 19166, 65801, 73437, 16924, 57575, 25297, 65233, 29184, 71904, 70199, 21478, 56347, 10594, 14085, 11504, 24496, 19112, 30652, 17987, 23326, 24886, 67541, 3182, 39981	yes
419	68525, 6735, 54587, 70858, 24743, 24430, 47469, 70572, 16711, 21579, 38457, 48922, 8987, 29560, 40210, 8453, 67738, 55384, 27466, 64761, 6655, 43290, 49246, 11821, 57302, 22520, 22813, 51839, 55729, 18389, 47549, 33153, 6612, 43029, 65346, 33666, 70883	yes
420	16927, 38567, 25958, 18349, 16270, 10062, 15573, 59223, 73235, 6447, 48040, 17875, 47551, 13025, 64899, 54749, 14016, 36804, 66119, 2091, 45571, 61745, 48648, 40188, 60880, 59373, 9796, 49347, 7586, 544, 7502, 67895, 71190, 12607, 53794, 18941, 68660, 70464, 73194, 19797	yes
421	48077, 51067, 18327, 50843, 3382, 35700, 61580, 21164, 56178, 44744, 60118, 24775, 56400, 4831, 13703, 17070, 37493, 46209, 53615, 40328, 1529, 51078, 31249, 29633, 27764, 61954, 4818, 39825, 45812, 10626, 34269, 9673, 68414, 40116, 7440	yes
422	6441, 36311, 1976, 6322, 13032, 18961, 24867, 11512, 20388, 32142, 51238, 51967, 26165, 58433, 47838, 26446, 63348, 33553, 2221, 14644, 58770, 74440, 61484, 21660, 41582, 2603, 10054, 51455, 2175, 17663, 7518, 29802, 47137, 61465, 61534, 63923, 73148	yes
423	56208, 10570, 42655, 51731, 57128, 27567, 66567, 48357, 28985, 67479, 31080, 20792, 65503, 52898, 29985, 67935, 2329, 57973, 53045, 53861, 57705, 32249, 33700, 59150, 47189, 18396, 71142, 26108, 66888, 14501, 4192, 62720, 39687, 26788, 73736, 65517	yes
424	23195, 30606, 1965, 26786, 24604, 3347, 61021, 51968, 44990, 7103, 31946, 16680, 13978, 65610, 8850, 73571, 41191, 67910, 44812, 31531, 35860, 26210, 51621, 68104, 44814, 19295, 46113, 33328, 11557, 4649, 27195, 44956, 74221, 63993, 48492, 46040, 17294, 54775, 23370	yes
425	14313, 48391, 72462, 16108, 59229, 4277, 55107, 23124, 49740, 49704, 10249, 5507, 11342, 62919, 27300, 36825, 11047, 10537, 34922, 19905, 16468, 13069, 66345, 54412, 30711, 3305, 72053, 68243, 38722, 41450, 56166, 58999, 35415, 918, 17607	yes
426	6354, 11284, 36474, 66346, 50570, 16325, 72648, 37067, 44037, 22054, 5593, 40731, 43415, 66995, 64802, 67132, 74227, 50046, 10727, 23150, 19575, 22547, 70316, 2814, 48033, 56559, 53708, 37932, 45976, 21894, 18647, 61166, 71301, 39978, 36507, 56234	yes
427	49171, 46426, 65756, 40156, 23574, 555, 48412, 73644, 42808, 36899, 16125, 62272, 70762, 25330, 49578, 9762, 23393, 39025, 34682, 19449, 50184, 6800, 11114, 67706, 14870, 29239, 1250, 22887, 43418, 65549, 52414, 4335, 8028, 51589, 42274, 15690, 47925, 54862, 13068	yes
428	6768, 40311, 41223, 32640, 639, 30831, 26058, 67144, 59918, 38844, 8154, 28466, 2412, 51503, 60061, 73093, 72587, 59807, 53148, 17042, 53238, 57761, 70660, 13791, 28921, 67004, 67071, 46629, 47328, 14548, 41701, 13623, 4331, 70632, 23919, 71021, 8081, 33098, 51489	yes
429	16835, 20857, 46697, 16689, 28782, 70499, 67580, 48168, 61346, 41514, 68795, 30770, 6118, 19940, 11506, 10491, 49033, 41165, 64411, 17412, 44481, 41061, 35395, 65881, 14990, 1971, 44471, 38774, 68834, 67477, 23715, 39042, 32392, 4235, 44904, 21937, 40211, 39585, 38624, 18612	yes
430	27566, 60277, 54728, 21758, 43329, 26735, 52769, 37209, 47757, 44157, 63563, 19528, 22555, 19714, 20164, 34335, 58302, 24274, 56877, 25870, 40226, 26719, 69335, 52029, 45724, 11974, 22206, 43161, 35515, 55878, 68471, 5420, 71539, 22072, 60611, 38639, 37443, 6619, 59073, 11771	yes
431	19693, 58994, 49473, 69210, 70326, 29958, 31188, 64542, 53728, 22741, 66558, 71148, 3334, 23790, 49166, 70246, 28839, 58060, 36786, 13433, 62703, 54832, 3432, 32186, 31681, 53840, 12785, 31638, 13538, 17669, 68573, 17028, 10507, 35637, 19310	yes
432	71741, 44894, 703, 4644, 38105, 18816, 38904, 4316, 61536, 40253, 44896, 53242, 18743, 22038, 33106, 10233, 7475, 7537, 49878, 51775, 39099, 9390, 54618, 6965, 64869, 62558, 71238, 17230, 43688, 19371, 17809, 41442, 56307, 43876, 46845, 17872, 14989	yes
433	47338, 44228, 5101, 57574, 61455, 71205, 1876, 43281, 4106, 56, 20069, 24115, 43896, 62748, 13042, 56790, 64546, 33987, 15594, 9991, 67183, 19251, 57941, 58931, 25702, 63717, 38926, 52366, 56551, 73220, 61212, 5611, 28294, 64928, 60411, 5540, 66741, 69406	yes
434	4189, 52195, 25537, 51598, 51026, 16479, 36031, 1737, 12901, 74106, 7584, 14275, 39193, 50462, 54038, 14900, 21045, 5866, 2515, 10932, 56839, 1278, 32399, 6214, 23786, 47799, 10456, 38065, 71635, 73827, 18364, 66203, 70866, 32468, 8383, 29141, 14826, 2463, 56193	yes
435	28827, 27380, 11874, 44696, 38319, 45313, 63970, 72722, 26302, 33611, 28230, 5435, 63163, 22657, 60137, 1575, 12473, 64001, 9844, 33542, 64782, 54027, 12584, 41675, 19477, 72921, 52661, 44408, 66341, 4976, 7749, 64164, 16090, 72433, 5685, 72884, 28311, 55253, 31519	yes
436	42985, 37141, 59248, 23982, 8122, 65146, 47542, 49802, 65383, 25389, 37242, 47832, 11774, 65705, 32413, 45212, 65277, 60412, 61690, 25417, 33651, 22673, 4589, 18588, 53522, 19354, 41149, 12370, 58902, 788, 74625, 41003, 9244, 70590, 14478	yes
437	14750, 66077, 69298, 50077, 52876, 44137, 51683, 30439, 23900, 60718, 59474, 41501, 510, 10438, 24774, 51558, 21106, 3131, 31020, 20883, 65296, 49071, 16247, 61905, 72, 14586, 30290, 46285, 23477, 36944, 52025, 72214, 55287, 63276, 45773, 51364, 48365	yes
438	3988, 21226, 28530, 48052, 68377, 14439, 37779, 73702, 3371, 27735, 12550, 32322, 28666, 44269, 65364, 39662, 11566, 54050, 21242, 4703, 1749, 25661, 57875, 73261, 14776, 36512, 62379, 61973, 5246, 13503, 54903, 59867, 65338, 13899, 16793, 49646, 24666	yes
439	61507, 17347, 40403, 39615, 58278, 73788, 7035, 15671, 68683, 1641, 19135, 3874, 38676, 40184, 32364, 2971, 5769, 40614, 72856, 71353, 11344, 33413, 41642, 66795, 15869, 59128, 62833, 30837, 64793, 67109, 15460, 68407, 69652, 54976, 44765	yes
440	47008, 60374, 9020, 33445, 6385, 26278, 7519, 16943, 36905, 7562, 57162, 20663, 38838, 27415, 74080, 73889, 17684, 9527, 20658, 3193, 7685, 23804, 46852, 67516, 40848, 15581, 53321, 41699, 4520, 62955, 62475, 1011, 32775, 50692, 39191, 11797, 10697, 6614, 47899, 64927	yes
441	28544, 53683, 71510, 43922, 70784, 22477, 7342, 48768, 30753, 15562, 8892, 12962, 70524, 53530, 3439, 59533, 6886, 40980, 54620, 72966, 28764, 60298, 54465, 9392, 60472, 69, 51279, 7978, 74029, 28486, 71233, 70451, 54504, 74527, 37872, 29447	yes
442	61189, 30263, 68355, 4269, 54787, 8886, 71474, 70562, 7757, 60128, 45662, 31419, 830, 11595, 73633, 53694, 56828, 63942, 51815, 17868, 49701, 23024, 50848, 27993, 65414, 67742, 27169, 27061, 31395, 18082, 55987, 51517, 3589, 52438, 2628, 27827	yes
443	16458, 25571, 71859, 35558, 71168, 70017, 41886, 2146, 32455, 35880, 4080, 31833, 20461, 43617, 2677, 35583, 31860, 66046, 40114, 42608, 15640, 25944, 23367, 10332, 30282, 7991, 34623, 28386, 71526, 30423, 26383, 48547, 44985, 16836, 62371, 15723, 12194, 44602, 17924, 22415	yes
444	38882, 33937, 18929, 3169, 63178, 7755, 33621, 73531, 46114, 73612, 31819, 8114, 73750, 165, 38306, 39243, 55884, 36373, 15703, 14616, 29224, 24434, 52374, 5111, 68850, 43955, 46469, 35001, 64062, 58696, 58608, 58695, 32688, 73862, 22039, 74495, 36250	yes
445	9066, 20497, 24893, 1350, 35671, 56939, 9882, 38251, 46034, 44418, 14109, 40999, 41581, 1095, 50767, 55855, 61331, 48796, 26353, 57748, 34979, 47331, 48797, 45322, 22062, 20562, 47044, 44299, 30587, 42354, 52750, 3314, 61090, 67846, 53665	yes
446	54661, 46200, 54698, 3423, 62728, 30175, 27352, 26938, 48928, 72370, 68626, 61235, 23711, 14546, 65221, 22804, 59951, 34315, 73325, 19784, 5229, 25218, 2586, 56871, 39676, 22223, 50318, 54702, 47005, 17589, 49856, 66809, 73953, 14564, 31841, 40769, 16503, 58833, 11420	yes
447	52223, 25313, 15056, 60890, 64109, 44965, 9816, 9834, 17506, 51129, 29033, 56608, 64347, 20628, 8343, 45180, 6988, 6446, 58429, 9276, 37720, 50923, 15809, 12781, 14547, 19438, 29270, 26319, 13480, 49261, 65347, 13680, 36511, 43056, 67013, 32013, 47929	yes
448	64035, 45432, 70741, 22287, 2302, 36183, 19954, 55730, 35420, 72467, 65025, 41498, 50940, 49164, 14664, 37807, 27176, 46299, 40934, 51686, 17442, 67609, 4036, 40538, 22261, 15220, 29247, 59309, 45638, 57880, 30531, 47252, 44997, 45303, 8413, 61590, 40909, 17216, 35183	yes
449	4070, 2676, 17678, 14578, 57838, 61956, 11056, 15994, 20517, 7660, 31437, 54096, 45870, 59983, 38399, 70428, 50662, 62901, 48311, 11155, 49789, 45920, 23720, 52175, 46323, 73976, 3631, 40523, 52289, 52216, 63588, 74497, 10521, 38626, 25524, 30047, 63217, 27713, 53984, 48185	yes
450	31187, 63439, 33436, 13717, 10887, 23753, 67048, 9741, 27734, 54091, 14472, 11441, 34819, 32448, 37801, 5259, 38421, 39434, 7168, 38713, 65082, 66296, 6753, 70216, 68336, 73425, 66013, 38917, 52964, 4109, 14175, 48081, 42464, 71466, 41952, 74131	yes
451	56482, 12926, 33931, 3114, 58333, 1909, 49742, 21869, 54151, 48862, 22518, 22674, 48104, 66878, 24664, 49191, 20213, 10353, 52727, 30067, 22252, 67233, 67841, 74501, 1768, 29959, 52059, 49957, 30052, 19445, 70041, 64578, 42412, 7769, 22352, 1691	yes
452	26988, 38419, 14441, 47866, 74191, 67649, 22876, 59407, 48142, 41938, 15582, 58888, 70423, 52371, 51495, 42247, 295, 38245, 46674, 32384, 17156, 61826, 51726, 58843, 19227, 33665, 58223, 14715, 42312, 51823, 63707, 42415, 59226, 19509, 33197	yes
453	16710, 57936, 35018, 61890, 59011, 43891, 65913, 53702, 64752, 25434, 36301, 52894, 8079, 34683, 35094, 63198, 11396, 71824, 67954, 72473, 20297, 20948, 63969, 74533, 74275, 37787, 26198, 37841, 16681, 64834, 46471, 73170, 13796, 30055, 28078, 69831, 953, 71396	yes
454	72768, 7288, 27737, 11563, 30246, 5436, 42318, 57523, 20456, 66088, 12491, 30744, 35461, 40974, 57264, 23101, 55717, 32711, 45876, 14574, 29280, 64192, 70343, 58768, 59225, 70677, 21115, 74119, 68570, 29269, 62294, 13499, 69523, 48998, 71076, 32648, 24563	yes
455	49911, 71053, 32058, 19491, 43440, 36229, 10651, 55703, 21535, 56691, 46881, 74276, 19107, 20502, 13818, 36177, 54115, 46491, 36167, 36492, 5024, 65852, 43753, 20362, 10779, 4945, 9078, 5811, 48358, 7824, 64695, 55956, 24702, 62693, 64054, 55636, 47255, 16216	yes
456	58591, 11625, 62137, 41152, 50917, 5831, 74605, 1854, 46997, 73945, 65618, 28344, 36275, 1756, 65234, 34485, 38178, 17245, 12522, 56406, 27475, 16655, 25098, 48533, 74393, 59856, 21528, 68766, 32694, 23846, 4173, 16241, 67758, 18461, 50643, 66765, 70635, 5319, 18165, 57618	yes
457	33626, 7837, 26212, 8158, 42884, 36001, 48842, 55261, 43773, 51778, 57822, 266, 46417, 9711, 50884, 56712, 39498, 68487, 4337, 33942, 58633, 59819, 72717, 26776, 67382, 789, 7028, 681, 41425, 27318, 36098, 36119, 48299, 22406, 2276, 32376, 9330, 26101, 33268	yes
458	33782, 42132, 29086, 6629, 66894, 34646, 55214, 61038, 73740, 1307, 12710, 25886, 62449, 12928, 45750, 15666, 13320, 15993, 6912, 26996, 13659, 68521, 68928, 72225, 42355, 38577, 8991, 17824, 28509, 44058, 70167, 3891, 67475, 15326, 48591	yes
459	5358, 53140, 56650, 34739, 34569, 28217, 66803, 53853, 38845, 2081, 7006, 42250, 64741, 4827, 64837, 38571, 49521, 19555, 71529, 21667, 52932, 54122, 28890, 74327, 1592, 52984, 675, 8815, 64562, 24414, 21853, 3260, 44980, 64632, 60142, 10755, 60867, 69377, 55829, 27149	yes
460	56140, 21161, 4202, 51054, 22768, 39956, 16790, 52324, 42707, 62186, 36008, 64112, 67457, 2270, 71993, 70748, 55839, 24125, 58431, 54658, 49538, 41779, 38961, 65589, 43516, 10036, 60467, 71356, 57383, 29960, 20644, 36384, 63138, 69265, 61813, 63851, 55550	yes
461	33808, 67838, 22919, 6315, 67542, 20186, 26351, 69402, 5298, 5009, 13153, 40182, 24074, 4062, 18563, 433, 8719, 52600, 42797, 73539, 24041, 224, 70847, 74023, 68408, 20831, 7206, 55382, 14294, 70007, 26964, 64240, 65478, 70813, 33984, 34757, 6714	yes
462	50773, 25529, 28173, 33809, 4687, 67829, 27710, 10327, 4615, 29549, 63047, 42361, 56688, 30089, 11299, 21569, 23611, 43630, 3455, 55194, 72471, 6237, 12865, 2657, 70546, 47952, 31772, 66942, 51824, 35782, 67982, 7322, 68105, 5304, 55574, 22672, 837, 69533	yes
463	3773, 21791, 66513, 61860, 24264, 73417, 49906, 19071, 20279, 9959, 43702, 11229, 11199, 38971, 34731, 36376, 21876, 65877, 67014, 52605, 49537, 40768, 30620, 52392, 25601, 45417, 2806, 47145, 10951, 72724, 34601, 71714, 69739, 1194, 6002, 5266, 39797, 32430	yes
464	34280, 74071, 65909, 69606, 33579, 20954, 24169, 20868, 69593, 2074, 39551, 43298, 53705, 31647, 8558, 12971, 41370, 43410, 59370, 3056, 70976, 28372, 43475, 38729, 34672, 71524, 51860, 71760, 58120, 71563, 45087, 69204, 54742, 34558, 18410, 55936, 60516, 72029, 62286	yes
465	47455, 8746, 58095, 63583, 29045, 28283, 48689, 32209, 42738, 68861, 63278, 46410, 43626, 11026, 20347, 508, 58991, 63883, 59990, 56014, 20017, 23778, 5762, 73563, 47043, 22551, 9227, 39698, 6136, 30169, 30640, 7472, 17835, 31237, 44103, 39023	yes
466	28435, 9782, 20798, 63263, 58207, 24231, 33868, 53261, 42777, 23767, 41190, 49187, 36387, 13942, 54905, 40367, 28848, 30283, 43398, 61215, 20822, 42628, 58729, 71172, 71734, 63488, 36508, 49664, 45378, 15342, 50238, 37306, 12969, 49771, 72767, 11925, 33166, 32582, 34726	yes
467	70107, 3979, 19972, 49959, 52899, 49505, 13409, 56902, 59998, 393, 67831, 65629, 55583, 9005, 50382, 72063, 39953, 22476, 14882, 59900, 55963, 31876, 65684, 74236, 74176, 32318, 41494, 62879, 45502, 31818, 18197, 41097, 13644, 34711, 68058, 29397, 17826	yes
468	61281, 60025, 52735, 63034, 24447, 62889, 14837, 20285, 17212, 47057, 21365, 66226, 4736, 12662, 71580, 72481, 65157, 65524, 44482, 16617, 29542, 7700, 4148, 66348, 38946, 51622, 12409, 29205, 21009, 10673, 39026, 74320, 26618, 53549, 69573	yes
469	66833, 73031, 71456, 63476, 47499, 21302, 63477, 45286, 14206, 32506, 58252, 101, 58716, 64005, 54039, 46734, 57647, 42830, 39660, 51083, 2125, 70903, 735, 66433, 40404, 21553, 58040, 50325, 45810, 31146, 60711, 32564, 37349, 40986, 36430, 56157, 33272, 53681, 45364	yes
470	30765, 2663, 32071, 70733, 50830, 51185, 8599, 23368, 31737, 2295, 48246, 23246, 65001, 30684, 46939, 11742, 65496, 56963, 69426, 32857, 58343, 34594, 66288, 5792, 62614, 23878, 15718, 32729, 12272, 48699, 16405, 19028, 23365, 46453, 34605	yes
471	23449, 48802, 58464, 52968, 19852, 41705, 67536, 47052, 6341, 13993, 31532, 33828, 39190, 74361, 21015, 67663, 72579, 13176, 42376, 15867, 20055, 73328, 52882, 68087, 54687, 26010, 7282, 29743, 22780, 13871, 15572, 69284, 24965, 73134, 1886	yes
472	32385, 54501, 67914, 57912, 39863, 36184, 6471, 53244, 52226, 53143, 21235, 53653, 10128, 61510, 52775, 38338, 70788, 57513, 36717, 35824, 42196, 14959, 48073, 73423, 23099, 69894, 58886, 12993, 10048, 45390, 50480, 73237, 58244, 66179, 615, 40587, 40491	yes
473	58426, 13298, 4149, 9645, 50413, 7353, 26777, 36077, 55668, 24704, 30304, 61786, 59802, 59082, 18546, 62393, 159, 786, 14400, 72331, 51089, 67965, 70208, 47557, 69472, 9542, 35790, 60725, 4920, 14839, 52136, 54471, 6805, 15229, 30366	yes
474	37820, 19362, 53960, 7203, 32914, 69146, 38755, 74310, 40536, 7459, 25191, 62385, 52296, 4934, 29164, 13435, 22932, 2049, 456, 7508, 68123, 53600, 40100, 63245, 27553, 50541, 49009, 53364, 41939, 30435, 34036, 39667, 33027, 26645, 930, 62603, 58743, 35810	yes
475	19111, 24191, 32436, 30895, 8574, 57805, 36053, 10382, 64594, 64003, 16268, 37882, 55091, 796, 42776, 51909, 55074, 73471, 69304, 31252, 15513, 55168, 60772, 32577, 36346, 5823, 61944, 73956, 16729, 74434, 46106, 40978, 60390, 57241, 32491, 58737, 30036	yes
476	8411, 499, 58560, 43275, 435, 56800, 40790, 25666, 48735, 36254, 32712, 21623, 18967, 47918, 57709, 74432, 30478, 39689, 33200, 9343, 2788, 22962, 49819, 24602, 3626, 39468, 16748, 26092, 32962, 55875, 56434, 42018, 59233, 53562, 39581, 10391, 49470, 53329	yes
477	41949, 17366, 362, 10210, 53325, 12174, 28813, 10294, 21751, 31208, 12364, 31091, 69122, 5816, 9235, 36287, 48677, 14903, 31115, 38024, 60788, 71223, 67515, 65200, 53989, 27888, 15276, 2136, 61002, 12401, 19817, 45184, 46777, 48614, 38674	yes
478	61892, 53529, 27739, 55149, 50520, 30700, 37138, 45190, 48275, 36577, 20963, 51019, 41829, 47609, 50727, 48616, 21482, 41423, 72096, 32803, 18101, 36764, 50248, 7123, 9122, 39975, 65688, 47885, 20610, 65410, 71919, 71519, 45844, 28233, 57843, 44352, 58245, 54732	yes
479	12395, 8518, 33604, 33757, 55833, 9686, 47888, 59714, 57057, 31214, 42545, 28749, 20305, 42020, 65796, 21495, 34123, 61586, 46433, 4819, 13877, 37075, 28417, 30359, 17933, 28406, 30125, 55506, 21571, 11919, 72895, 38985, 21210, 62249, 18677	yes
480	38440, 7731, 9014, 6091, 12114, 31535, 4060, 11898, 70715, 25134, 37565, 46315, 28885, 54005, 31286, 41976, 43520, 55237, 23642, 59023, 35117, 28604, 28110, 57771, 27053, 5869, 19725, 41055, 67230, 60264, 17771, 48581, 59863, 40737, 6872, 66112	yes
481	63845, 63086, 14916, 51132, 15654, 31994, 59336, 33378, 23069, 48324, 2180, 57690, 30485, 16915, 15840, 69244, 16519, 24152, 7169, 47323, 29899, 41280, 16788, 46489, 58594, 38035, 39923, 4484, 61095, 11443, 36011, 14318, 57014, 45491, 67876, 31367, 11353, 3140, 1418	yes
482	21551, 30076, 29661, 70081, 51597, 50396, 45506, 71975, 32091, 10941, 60964, 34602, 49503, 38675, 57343, 56371, 6250, 54436, 9942, 15200, 41942, 17552, 24590, 53897, 20453, 21055, 27130, 46142, 45204, 69650, 8707, 12219, 32296, 436, 74407, 59159, 31669, 66553, 37967	yes
483	14969, 10311, 54939, 63210, 8587, 17132, 3031, 99, 68721, 52885, 61824, 60106, 65232, 61963, 48286, 68016, 37284, 56895, 59383, 8585, 72161, 70193, 46646, 12965, 26848, 52422, 19535, 26373, 69116, 64664, 10992, 19532, 45135, 67945, 41345, 36792, 73772, 34812, 16981	yes
484	35391, 61724, 28177, 60228, 48267, 65755, 38856, 60628, 18585, 8564, 10688, 28303, 9132, 72464, 4476, 55541, 5437, 60726, 39614, 62498, 56722, 16425, 63176, 72665, 44443, 62653, 40042, 27023, 64654, 30115, 21375, 29967, 35009, 32019, 73927	yes
485	18021, 46667, 57468, 42251, 841, 35006, 73229, 13843, 12601, 49582, 68884, 30513, 73281, 62572, 62053, 58984, 49543, 49774, 8068, 50408, 18438, 65131, 27313, 64566, 19211, 22009, 55341, 58900, 19441, 57294, 12144, 862, 9395, 72406, 46165, 28636, 34433	yes
486	6137, 51065, 60009, 59650, 72197, 51414, 6085, 32476, 13603, 40151, 13228, 48731, 16719, 53879, 48979, 36943, 55285, 11331, 70804, 44722, 15528, 40247, 869, 36797, 47359, 67041, 51313, 2804, 45216, 33221, 74291, 50364, 37869, 24094, 43614, 17178, 69730, 44790, 51674	yes
487	61017, 64388, 46416, 21432, 43990, 19294, 44849, 70523, 48515, 7707, 37901, 18361, 59972, 10227, 46074, 51626, 35814, 8419, 27213, 53746, 19063, 72364, 22543, 48692, 74205, 46435, 47767, 39088, 46677, 69789, 23197, 62474, 52718, 31680, 71862, 3663	yes
488	8837, 8305, 47319, 41460, 4191, 73493, 36328, 18712, 21159, 22404, 2462, 7565, 9441, 17135, 33133, 62982, 70871, 63289, 14438, 7799, 12916, 50638, 27202, 27363, 6819, 35774, 991, 30944, 4176, 23877, 35542, 6930, 41663, 18654, 50416, 8218, 9566	yes
489	9341, 74387, 44083, 51199, 45679, 46339, 30510, 49425, 42144, 25585, 28409, 27498, 30277, 25014, 30939, 58610, 59609, 34080, 55065, 33474, 22021, 41553, 21727, 17490, 55954, 73536, 38796, 63370, 31824, 24782, 68966, 13664, 55690, 43407, 56375, 34916, 49650, 24989	yes
490	72061, 19086, 31451, 757, 60521, 41812, 21399, 64087, 61594, 38175, 72200, 53878, 7657, 28830, 32985, 25569, 44838, 6654, 42287, 50900, 25404, 16434, 27717, 73835, 49780, 22776, 34041, 35411, 53647, 11300, 30399, 55609, 49220, 44388, 31344, 8310	yes
491	16279, 67453, 62859, 53815, 26827, 24952, 53747, 51930, 13693, 68107, 390, 45101, 35870, 70247, 12040, 41241, 29546, 68030, 39957, 55647, 52383, 2637, 43113, 39526, 51209, 30390, 18250, 28211, 27569, 35095, 64811, 73331, 65010, 66432, 39633, 15222, 985, 6784, 68108, 61194	yes
492	62733, 9661, 29641, 26217, 74595, 54386, 68666, 68417, 71297, 19787, 62086, 31639, 42000, 17567, 2379, 7192, 42769, 6062, 1809, 58997, 65081, 19005, 26337, 71064, 7810, 5888, 44515, 29805, 43776, 33683, 25913, 41834, 36918, 62579, 20738, 32915, 69171, 2859, 57640	yes
493	71222, 36640, 65035, 10633, 67246, 22968, 17337, 27657, 13310, 2666, 52667, 57374, 32182, 64472, 16078, 49689, 333, 40956, 5284, 30413, 55671, 72571, 1238, 53278, 26460, 57381, 40544, 26246, 2707, 3863, 35484, 27598, 62125, 73086, 17333, 66609, 16746, 3734, 57519	yes
494	35785, 63146, 6327, 32574, 27790, 48374, 11633, 38090, 29090, 56737, 20474, 25356, 58198, 53429, 67494, 55807, 40379, 8733, 25617, 58667, 71922, 18486, 43768, 21149, 18726, 60779, 3839, 44549, 154, 71249, 29372, 68535, 61995, 29914, 6006, 26906	yes
495	31082, 40176, 9447, 60193, 10262, 853, 17411, 27458, 2421, 14354, 14950, 26700, 54952, 45877, 36977, 39274, 56704, 25970, 67601, 30517, 49923, 36871, 19735, 56016, 55370, 5450, 20468, 23293, 39516, 458, 25613, 53574, 67566, 36128, 15138, 64573, 44014, 33136	yes
496	66943, 27219, 4213, 40917, 23258, 32734, 12583, 37025, 5519, 72140, 56267, 55148, 17372, 18694, 2348, 10758, 7297, 29147, 19352, 16357, 10288, 74087, 10982, 17446, 55219, 34083, 231, 4352, 7311, 38239, 19760, 47723, 13338, 9561, 60054	yes
497	12359, 15327, 7724, 34115, 5424, 45786, 68391, 50240, 52205, 34048, 44117, 1273, 6400, 21828, 2176, 3785, 32110, 37069, 12260, 38927, 234, 22433, 16800, 49474, 27214, 9060, 48051, 59904, 9332, 16284, 59171, 38049, 4402, 14423, 54163, 69166, 16021, 4833, 43094, 49680	yes
498	65625, 29379, 29222, 9524, 59331, 50323, 44828, 52656, 2420, 14654, 49987, 37532, 64111, 57298, 22902, 5356, 73974, 700, 32798, 26859, 16808, 45379, 5597, 63966, 39553, 16209, 49023, 18448, 65026, 53981, 27077, 25077, 3597, 37388, 15547, 5918	yes
499	14763, 42493, 55741, 48202, 73993, 50912, 9278, 17268, 8187, 73975, 39821, 6436, 65675, 13952, 1106, 58314, 7064, 46821, 8390, 62486, 38740, 45693, 52455, 52850, 6816, 26473, 25768, 66603, 72163, 16048, 71581, 72538, 30886, 57856, 28796, 67924, 67788, 56098, 56088, 97	yes
500	21731, 58329, 72760, 49745, 408, 73965, 6854, 41326, 2897, 15391, 30179, 19426, 1567, 30256, 60450, 12608, 70513, 1218, 65643, 29627, 28126, 55536, 19364, 48809, 5156, 13178, 33516, 36487, 18551, 70941, 34385, 49725, 33528, 36774, 64419	yes
501	56148, 4382, 21028, 55019, 19763, 11430, 1179, 33317, 39712, 43414, 5313, 44091, 46865, 71167, 63314, 43829, 10348, 30086, 39098, 15888, 3564, 63944, 3866, 64242, 61016, 37094, 57150, 57621, 71078, 31263, 23532, 39192, 53217, 1798, 21358	yes
502	20889, 36584, 1511, 72170, 10700, 50689, 27699, 43661, 33844, 19428, 4914, 47797, 420, 4111, 3602, 45734, 19480, 70474, 60066, 30843, 27976, 51705, 22002, 19899, 3812, 69932, 6602, 33259, 56394, 47881, 34234, 24374, 24005, 34446, 70647	yes
503	19422, 27454, 12821, 1872, 8960, 54508, 52542, 41778, 60509, 67802, 56000, 3738, 53541, 33649, 8972, 66758, 41014, 25358, 66041, 13827, 32658, 45914, 32845, 43339, 38570, 54102, 60792, 65033, 45631, 64915, 47576, 13096, 24940, 36696, 30560, 64064, 59266, 55568, 43975, 71507	yes
504	42964, 31139, 69333, 3349, 69869, 39508, 26055, 41328, 8621, 52518, 48419, 68898, 62344, 52298, 38446, 55119, 60121, 70645, 13943, 7730, 60899, 576, 67518, 44382, 65404, 55266, 55552, 59653, 14849, 23915, 46790, 42504, 67311, 51419, 23587, 59288, 50260	yes
505	30614, 4138, 31431, 62524, 53050, 31967, 15758, 62865, 42832, 32002, 64213, 6870, 44694, 43115, 37100, 22803, 59722, 29611, 16888, 7874, 62701, 65586, 31122, 25998, 19593, 71380, 11291, 16463, 50799, 35776, 10190, 4979, 68060, 66032, 32811, 74646, 9674, 9827, 64833	yes
506	52200, 71153, 18602, 20203, 70587, 9422, 70148, 27674, 74545, 6090, 12242, 69515, 1502, 15174, 4991, 45176, 14242, 68131, 52058, 46119, 28871, 63444, 34268, 18235, 54152, 62959, 19273, 28943, 51529, 27766, 974, 61370, 46115, 59732, 40250, 17559, 28571, 37132	yes
507	68177, 46137, 14390, 9937, 30373, 51073, 27961, 73048, 1770, 34301, 60737, 50117, 45197, 23635, 6711, 36124, 56531, 42054, 28844, 14335, 39638, 51879, 51735, 55761, 37448, 14437, 45726, 64637, 62945, 50476, 2281, 31563, 46992, 16295, 36363	yes
508	32224, 25320, 49597, 61251, 73193, 49137, 67131, 49945, 15191, 16179, 62530, 66307, 5235, 10677, 31404, 9770, 15473, 60248, 25881, 69727, 63723, 23779, 35633, 55069, 21195, 46176, 57453, 31342, 56635, 19804, 41985, 38605, 24670, 69693, 50149, 8641, 49668, 70993, 73790, 72609	yes
509	26619, 10149, 43360, 33235, 10583, 42320, 14576, 3089, 45581, 44959, 70301, 47864, 23021, 30185, 5179, 72780, 10946, 61473, 42609, 42484, 4311, 41859, 2655, 2878, 29704, 66935, 13933, 66862, 15904, 46917, 59201, 10702, 58702, 54021, 14912, 52697, 57939, 45376, 58782, 25130	yes
510	72687, 42794, 23308, 3726, 42753, 45209, 57047, 33411, 26954, 24465, 36238, 71608, 51964, 24811, 20008, 19017, 42110, 63948, 20716, 22827, 39298, 54231, 73077, 12520, 7276, 64158, 10371, 19305, 25290, 54010, 7247, 5821, 27666, 36636, 29203, 74283, 13531	yes
511	36408, 51606, 67194, 49097, 56861, 43881, 68399, 27299, 10066, 45405, 7066, 12195, 10109, 35086, 48932, 2810, 32639, 28141, 16382, 43051, 2570, 11028, 46400, 3132, 61087, 17630, 17494, 63867, 61088, 8868, 74612, 57314, 52170, 33238, 2714, 21097, 25195, 48704, 1734	yes
512	15503, 11144, 79, 1352, 56351, 47670, 27064, 19585, 26408, 40997, 3653, 29249, 67754, 8131, 30444, 9141, 70098, 73574, 54407, 66224, 46162, 61991, 17799, 5592, 46747, 58826, 52191, 6718, 45617, 46201, 51395, 6259, 30319, 30073, 46307, 49717, 40945, 27829, 58031, 17222	yes
513	30436, 66, 45562, 37120, 7211, 65893, 68431, 49096, 41673, 5460, 50790, 33316, 59698, 4124, 72085, 59362, 50422, 34053, 27597, 69450, 9968, 25765, 25482, 61501, 61449, 6488, 33032, 7876, 26253, 39721, 4182, 67514, 36465, 5763, 49045, 39609, 70831, 7751	yes
514	13799, 5924, 10987, 57265, 2826, 45684, 55999, 21783, 74655, 12748, 12148, 19768, 55391, 3706, 47335, 4237, 62099, 30021, 13095, 22778, 6578, 16904, 3011, 15215, 17022, 72062, 49574, 51035, 24817, 24082, 53191, 72224, 64000, 64755, 69239, 10450, 70458, 56402, 46156	yes
515	73131, 45234, 11161, 53434, 5670, 23389, 61214, 54204, 8434, 35594, 49988, 55336, 7196, 66111, 24784, 35319, 45203, 45625, 73309, 51671, 15195, 63972, 42079, 45966, 18894, 42211, 26624, 29717, 23973, 54738, 262, 63221, 71873, 69280, 62934	yes
516	71310, 32052, 50748, 4751, 15676, 71750, 36828, 74416, 37421, 1169, 48584, 16181, 3559, 22629, 72470, 5794, 72333, 42451, 4410, 24929, 24061, 46716, 56037, 34718, 39400, 46108, 28771, 12922, 46120, 34560, 53287, 71279, 72822, 58019, 56653, 69167, 50818, 4511, 18895, 6469	yes
517	29908, 43997, 54711, 19670, 60709, 64006, 59403, 4532, 1741, 64343, 55708, 3543, 10898, 63136, 23249, 63042, 12228, 61959, 73716, 17529, 48252, 35630, 37600, 55920, 14886, 62632, 32057, 14587, 58226, 26034, 43337, 30071, 71018, 26131, 68996, 7017, 39801, 74237	yes
518	65946, 57506, 31069, 52660, 11856, 52067, 63486, 8056, 20175, 55139, 37692, 11173, 61893, 32527, 49786, 50970, 70288, 30811, 25085, 36923, 50974, 28556, 64616, 6139, 62164, 4949, 33548, 8006, 63975, 12227, 22960, 38700, 36012, 25041, 67234, 4255, 40583	yes
519	63891, 54636, 4756, 14230, 49013, 30167, 50589, 3978, 8263, 57754, 2278, 16599, 5007, 49801, 52648, 26912, 46163, 66608, 9335, 34327, 30177, 68297, 26984, 36762, 51484, 43461, 2021, 73216, 49874, 67257, 34288, 7469, 26702, 41879, 34974, 73055, 7358, 19323, 58955	yes
520	26998, 47054, 33935, 30157, 58396, 50906, 42782, 49827, 45060, 55544, 43537, 32693, 29501, 45694, 16342, 7778, 24769, 66206, 33796, 53704, 34834, 5649, 18986, 23251, 7312, 69993, 52527, 31854, 36003, 71607, 28124, 28205, 36669, 66325, 21534, 24716, 29728, 67737, 60232, 15750	yes
521	67772, 23360, 73797, 45000, 41598, 49513, 64941, 35017, 70975, 45259, 68904, 62805, 39393, 57735, 30761, 71370, 36331, 61545, 67397, 56181, 28487, 8844, 66531, 49362, 43961, 32644, 73938, 52754, 36365, 20692, 61270, 38274, 36597, 14611, 66069, 48685, 58303, 6386, 53150	yes
522	35272, 58224, 14006, 9889, 44107, 69481, 12891, 37340, 18067, 6587, 29841, 34324, 53055, 48532, 72332, 14956, 35998, 43596, 31348, 55411, 30981, 17039, 24315, 40334, 7886, 70152, 13341, 64640, 1052, 7890, 71579, 45037, 32446, 19484, 47181, 54274, 47982, 72752, 45725	yes
523	28480, 55400, 61707, 37154, 67301, 64582, 23564, 23405, 67101, 13062, 61642, 38597, 31776, 14820, 70402, 7779, 32863, 62084, 1940, 35722, 43981, 6665, 8061, 13387, 11881, 31476, 31794, 41232, 44527, 52303, 21249, 61068, 45003, 56601, 20051, 16058, 21677, 56648, 25172	yes
524	39748, 40277, 1235, 10656, 30174, 42066, 29188, 14100, 11737, 34077, 67963, 13149, 49429, 70730, 46419, 22740, 44490, 61280, 7251, 67647, 39788, 37957, 30168, 32113, 61045, 7529, 27423, 53858, 28465, 3069, 24247, 21436, 61376, 5765, 31701, 9380, 74041, 20576	yes
525	40427, 31090, 51518, 20265, 63309, 47003, 2782, 68796, 47668, 28679, 46111, 71434, 57891, 5598, 1494, 38497, 65217, 70501, 16182, 65325, 8351, 33146, 23742, 1829, 47242, 15780, 66453, 36567, 7235, 59884, 24406, 54759, 1990, 53469, 4224, 69387, 53305, 73757, 49444	yes
526	4492, 72990, 15455, 50976, 18075, 44756, 69743, 39133, 9607, 52734, 2323, 61739, 65476, 24401, 52491, 914, 68993, 17528, 5285, 38298, 49592, 39473, 8748, 35330, 44610, 59729, 62505, 24835, 41123, 17629, 13392, 28299, 11451, 63928, 43384, 9603, 65428	yes
527	47477, 27854, 74161, 5073, 63651, 22471, 48806, 65301, 31709, 5339, 16004, 47254, 33811, 52290, 3899, 52918, 21617, 38029, 12792, 23725, 65381, 6263, 47984, 68717, 14898, 56259, 8569, 54494, 67994, 37592, 29895, 29229, 9726, 51491, 62026, 38821, 20330, 15061	yes
528	32336, 24233, 23296, 44688, 73470, 50691, 47441, 27512, 48566, 63747, 18450, 42956, 52472, 8002, 69530, 62326, 36233, 64440, 45164, 60558, 24293, 47753, 36718, 44598, 1769, 47687, 9861, 42052, 34740, 59071, 31274, 61381, 7301, 6617, 27048, 38387, 5559, 59551	yes
529	63876, 67898, 28049, 24512, 28756, 13274, 17957, 35660, 11565, 51499, 14185, 9131, 29708, 60181, 5554, 29674, 22781, 2193, 58337, 7298, 6972, 66461, 12302, 33801, 26372, 8124, 64386, 16517, 46516, 48410, 5679, 31674, 56851, 27334, 47177	yes
530	33395, 51262, 44988, 62911, 7176, 53022, 28055, 72805, 49608, 42910, 54498, 64649, 4325, 24476, 44196, 49376, 33752, 22889, 22685, 55324, 32665, 26078, 69286, 24472, 59264, 7068, 11078, 35199, 26110, 24205, 71343, 62046, 51655, 42856, 21170, 74002, 52752, 35286	yes
531	17312, 2340, 32396, 66061, 34752, 37255, 51352, 33140, 70214, 60122, 15307, 38036, 47086, 9925, 63940, 13753, 1698, 42648, 65702, 56006, 26607, 50736, 54344, 28352, 43774, 26049, 59230, 70954, 54708, 12557, 35518, 53407, 31197, 40525, 49273	yes
532	25164, 37786, 2333, 13396, 38551, 55739, 20603, 63978, 47639, 33430, 61672, 26773, 1062, 38017, 32350, 46802, 33913, 57305, 20504, 27081, 54357, 67703, 68085, 33426, 17822, 68383, 51273, 62815, 26585, 51885, 40263, 38886, 24910, 36336, 62868, 44662, 12645	yes
533	6582, 49879, 54521, 29099, 67534, 45561, 57096, 2819, 67582, 16032, 45729, 21047, 58387, 22341, 64877, 64920, 57288, 21572, 5567, 2565, 51330, 32528, 37299, 33785, 842, 45261, 69823, 49778, 12942, 68820, 56944, 28815, 56766, 35681, 72282, 16217, 24909, 22587	yes
534	74389, 55689, 14302, 12864, 59160, 41066, 62223, 5306, 39569, 62115, 68409, 48072, 72115, 67710, 34514, 61637, 58659, 16085, 28189, 16734, 42957, 212, 3395, 39847, 57659, 50780, 24222, 62634, 67681, 67431, 38037, 18915, 6449, 19258, 3176, 34609, 47417	yes
535	57112, 63122, 54739, 42076, 49533, 44188, 49986, 13920, 74118, 27984, 18908, 5941, 13134, 49388, 73181, 66760, 18870, 22723, 37049, 16042, 74287, 54437, 41134, 24691, 570, 7743, 23556, 32280, 50552, 33832, 36534, 71944, 13223, 30596, 6394, 52995, 35279, 71445, 40681, 53083	yes
536	48613, 71898, 35202, 16824, 44675, 47685, 37165, 14322, 11000, 30778, 39106, 21857, 20418, 38082, 73015, 36441, 26852, 42189, 48093, 59251, 28448, 67850, 42121, 21276, 60642, 20033, 55838, 49768, 38613, 46470, 48924, 72077, 40683, 47754, 45162, 42407, 7606, 9507, 70335, 25111	yes
537	28355, 39036, 73162, 13742, 19814, 11025, 995, 58313, 36261, 46991, 32866, 35703, 32000, 15650, 69297, 45651, 7555, 17384, 16914, 39450, 72483, 1480, 39057, 40815, 23011, 65521, 12803, 44324, 65027, 69642, 14977, 2715, 28380, 37160, 48996, 12103, 40264, 22071	yes
538	29857, 40365, 47862, 73348, 22730, 61498, 47321, 19214, 15819, 56952, 42123, 64132, 30431, 26053, 56470, 67158, 61857, 35209, 31543, 47987, 505, 65313, 37546, 20701, 4446, 220, 71498, 62076, 38800, 62881, 21003, 7604, 41746, 41331, 58666, 9593, 61262	yes
539	65490, 52206, 70571, 39906, 47216, 68589, 67362, 32922, 3435, 69948, 62068, 29806, 44000, 70972, 32597, 66283, 64409, 8805, 9347, 44323, 37736, 38404, 6219, 7556, 65700, 67035, 3751, 13402, 29381, 61219, 22463, 24872, 5872, 70754, 1645, 2425	yes
540	58056, 58976, 34745, 68722, 73820, 71826, 207, 51085, 12269, 51485, 33128, 52555, 7167, 23695, 65481, 431, 8156, 40216, 10757, 521, 4275, 69085, 64648, 23682, 23802, 34028, 67734, 53159, 62762, 10653, 35424, 69047, 809, 32365, 70820, 36834	yes
541	24902, 30880, 42928, 33289, 10489, 15897, 49329, 32088, 10368, 16911, 57384, 14582, 42982, 35636, 20093, 45861, 24375, 35270, 64750, 29403, 31247, 39442, 17527, 24865, 56301, 8230, 39397, 31901, 64414, 70435, 53462, 47704, 35204, 7813, 42921, 69617, 61012	yes
542	17566, 1908, 53745, 19705, 74467, 22500, 67713, 60392, 34907, 5751, 40045, 62757, 17065, 68124, 46876, 18732, 42515, 40495, 69316, 26654, 67729, 19145, 2305, 31470, 4013, 51957, 12319, 9519, 21251, 49306, 28500, 5950, 26458, 33468, 33817, 59591	yes
543	60124, 72499, 28836, 18053, 6723, 57413, 30045, 51893, 59700, 62091, 54385, 771, 13170, 46480, 61802, 28006, 1136, 70143, 29724, 37017, 60073, 22681, 50610, 57319, 44819, 22972, 57005, 44211, 5289, 10389, 3876, 43695, 68658, 12159, 74349, 19320	yes
544	61790, 51891, 18078, 4884, 37239, 58872, 72723, 9990, 11765, 3142, 36859, 52494, 39118, 26636, 2458, 24662, 10908, 40461, 12762, 13895, 16533, 71801, 53106, 57688, 37810, 39339, 39264, 44935, 52993, 61858, 19481, 35995, 23026, 23931, 65351, 65183	yes
545	17694, 18057, 53500, 41224, 35016, 49402, 53348, 23174, 72842, 31488, 40549, 31213, 23535, 71236, 61254, 41769, 1947, 54157, 37628, 11355, 46982, 64940, 9174, 40212, 11706, 73936, 50449, 72909, 30426, 13619, 52978, 33960, 14634, 49652, 21391, 32936, 65929, 45426	yes
546	40449, 28849, 67338, 52217, 20154, 58383, 8730, 15909, 35140, 63616, 44578, 55929, 28671, 36526, 24324, 61051, 7258, 6610, 69558, 3415, 51970, 6130, 61202, 39484, 19850, 24637, 71333, 67407, 35156, 17030, 31225, 59894, 54686, 38160, 63048, 10448	yes
547	74257, 10919, 1992, 12350, 50374, 45838, 57696, 40548, 10369, 57779, 58745, 73486, 7292, 16381, 18306, 11297, 46447, 48799, 28396, 42157, 45423, 6996, 49271, 68181, 27678, 34114, 13319, 73537, 49676, 41784, 65781, 13673, 2813, 385, 42236, 6297, 54735, 10797, 4942, 58830	yes
548	41120, 26428, 42295, 35691, 72064, 917, 25498, 30747, 11236, 15776, 53441, 39411, 28198, 43054, 18564, 12328, 56034, 22524, 25500, 26416, 11827, 50256, 64558, 54745, 706, 57052, 23724, 22779, 9149, 733, 36446, 71737, 63554, 33815, 45279, 58577, 11665, 30138	yes
549	2796, 9828, 70920, 35938, 14295, 17392, 50487, 9163, 48425, 65641, 69451, 11493, 37828, 35160, 22452, 23984, 28251, 36985, 3165, 7363, 15756, 33959, 5700, 35510, 61342, 29948, 49410, 48857, 9455, 18897, 543, 24301, 59879, 40128, 54446, 20060	yes
550	16918, 56261, 23143, 67252, 35362, 73532, 19210, 69825, 9366, 22063, 72405, 18368, 17279, 31880, 56618, 34408, 35247, 45903, 66470, 60913, 74535, 71442, 71799, 27711, 12935, 36088, 1781, 54013, 47535, 24825, 65539, 20777, 58940, 24284, 5535, 21945, 46083, 24607	yes
551	19836, 14648, 52343, 9199, 3001, 67078, 74067, 31417, 47662, 18048, 9242, 18105, 45620, 10733, 10388, 58105, 70175, 34201, 30975, 72852, 9622, 46052, 17038, 4368, 7380, 33209, 56684, 70472, 56522, 32595, 44818, 30899, 65975, 13297, 52623, 25988, 47851	yes
552	8632, 26606, 55364, 32211, 58434, 20786, 22281, 39515, 49407, 22686, 33825, 27373, 33470, 36455, 18772, 46713, 67858, 7188, 47410, 29962, 59982, 63626, 8578, 61374, 18384, 1134, 33685, 42812, 74172, 48975, 39778, 38730, 28492, 57998, 4665, 24786, 71864, 73300	yes
553	34970, 83, 65728, 67418, 65655, 18352, 3908, 53145, 65831, 6349, 63063, 43409, 403, 12032, 9234, 10007, 4689, 54388, 37464, 62267, 38388, 6187, 5553, 17406, 45975, 38474, 73324, 33062, 27174, 57516, 54371, 66904, 32360, 20168, 24175	yes
554	45580, 45901, 35734, 69149, 25375, 13676, 8942, 25704, 22480, 18440, 19236, 35835, 41079, 13492, 45941, 10459, 26184, 27623, 6177, 28434, 48849, 58212, 66202, 66343, 65884, 40779, 47409, 26780, 9756, 54694, 13950, 40904, 69636, 12699, 2103, 72378	yes
555	43361, 10637, 29486, 25453, 5423, 51446, 45177, 12064, 7893, 69879, 38132, 38629, 74281, 37773, 46055, 18684, 45298, 56518, 46476, 23729, 14899, 14716, 10042, 58590, 60337, 52114, 60747, 21023, 10807, 18527, 59576, 29658, 20523, 50092, 74550, 5760, 22137, 66510, 66753, 31966	yes
556	8067, 73467, 64825, 64541, 998, 53233, 25338, 49617, 62691, 8681, 12240, 29645, 38741, 51687, 58346, 45218, 1793, 43903, 37041, 12908, 54536, 32937, 59945, 22807, 1086, 39991, 23440, 37547, 897, 394, 71099, 68978, 48877, 59015, 40609, 65819, 39760	yes
557	12858, 63546, 25163, 55943, 23928, 35423, 27123, 44407, 43004, 8364, 32832, 71063, 5178, 5074, 28969, 27908, 33820, 32523, 6061, 64505, 72360, 69000, 33116, 18804, 16121, 34013, 13750, 42489, 20440, 1157, 36570, 65554, 25410, 23464, 49415, 54197	yes
558	4891, 29831, 51737, 53113, 55003, 22765, 47828, 1120, 55754, 56685, 1797, 2614, 36709, 37252, 2983, 43438, 72142, 64098, 70876, 6601, 16920, 56992, 10550, 54047, 34535, 60658, 24846, 6324, 64628, 34545, 18825, 24728, 13070, 67871, 15982, 57196	yes
559	59178, 59873, 49242, 60487, 71735, 7554, 19913, 4859, 45487, 70692, 1366, 20157, 58576, 41449, 23967, 11378, 13150, 64038, 57114, 29435, 42767, 3502, 61520, 47357, 70603, 23679, 10242, 6295, 33230, 40694, 66075, 23543, 43162, 42675, 54394, 50747, 27897, 67386, 22817	yes
560	70134, 6909, 17339, 52356, 34011, 2943, 8909, 66284, 41809, 34688, 36245, 9378, 54669, 22324, 12599, 61749, 38602, 72731, 59006, 4232, 71729, 36550, 30617, 39239, 32739, 34787, 1951, 55602, 26469, 23796, 26976, 4302, 33054, 29853, 17460, 53439, 17107, 3212, 37697, 30943	yes
561	44045, 47002, 22291, 25465, 7231, 17813, 12671, 32623, 10790, 43259, 11268, 69361, 57551, 26828, 45960, 35482, 70829, 40396, 33263, 46357, 34867, 71611, 58404, 74592, 66781, 54624, 63043, 45064, 3298, 70248, 62908, 50529, 9313, 33615, 42080, 322, 67250, 7181, 2697, 25841	yes
562	24363, 62697, 68354, 25052, 69500, 55514, 24826, 10843, 7834, 58320, 24077, 45932, 22366, 42728, 36545, 23858, 65600, 12932, 56350, 48395, 60855, 41774, 24039, 70675, 24255, 47574, 64643, 54631, 67859, 54740, 33557, 53636, 38784, 13883, 2284, 31840, 71590	yes
563	35259, 32561, 51827, 33713, 40520, 50947, 67787, 49628, 24329, 64224, 72343, 68076, 10552, 44373, 43314, 6418, 47953, 20806, 11539, 52005, 29013, 59453, 35496, 59148, 7059, 3598, 54284, 13351, 21184, 60348, 8496, 12887, 71473, 4907, 22726, 7025, 65862	yes
564	51444, 823, 3218, 14353, 1822, 41520, 65813, 57830, 43173, 38652, 58684, 57890, 51050, 30665, 43921, 1414, 68237, 10641, 29252, 30259, 27939, 71932, 7526, 26512, 20190, 10777, 55010, 59211, 73901, 34599, 3463, 69835, 48105, 68272, 41067, 25747	yes
565	34703, 57813, 54642, 67117, 26186, 29803, 43535, 5032, 59750, 23797, 9933, 64522, 43307, 11458, 61694, 8593, 73124, 7275, 31368, 29155, 70937, 33425, 30394, 1877, 29114, 38684, 41889, 61109, 63279, 72866, 55134, 72038, 10441, 48284, 6323, 33840, 10996	yes
566	65620, 38304, 463, 74618, 71673, 22707, 23924, 33765, 68553, 48227, 40713, 5929, 51581, 64999, 55103, 2293, 71765, 56427, 62148, 26033, 46484, 57048, 41531, 1593, 39922, 9755, 7670, 27072, 51141, 7887, 33291, 44150, 22388, 62949, 10191, 61966, 8787	yes
567	39407, 49791, 6160, 60776, 45603, 49820, 18904, 5782, 36009, 41548, 67717, 27011, 18739, 53051, 14488, 61971, 7840, 10306, 9354, 45871, 56693, 13111, 40742, 38076, 11585, 54435, 22756, 19870, 62479, 36866, 50375, 62830, 73249, 15247, 43645	yes
568	59898, 46167, 57271, 60844, 2763, 63558, 16982, 7981, 50495, 62977, 30271, 40602, 19051, 71924, 21766, 63523, 63040, 25667, 37344, 8498, 2044, 9109, 73667, 72580, 61957, 24297, 21740, 13735, 11631, 2223, 67383, 63214, 14225, 57209, 60417, 49982, 67408, 28534, 74306	yes
569	30948, 44033, 36111, 14010, 33164, 36428, 45100, 14633, 22647, 23529, 62659, 60281, 11450, 62629, 38495, 62958, 28206, 55283, 41656, 15362, 73651, 48983, 51053, 59316, 53535, 22801, 11122, 29101, 56544, 70621, 23579, 47468, 49184, 7493, 44223, 18084, 35026	yes
570	27355, 62487, 57320, 39675, 59942, 39011, 12711, 28910, 43636, 51384, 40484, 63490, 70706, 21737, 47000, 71471, 29991, 1615, 19531, 14573, 5254, 16336, 4969, 62708, 73748, 3646, 5876, 6662, 17673, 54852, 72779, 51166, 47591, 36133, 13665, 20528, 44905, 18782, 31878, 2483	yes
571	69962, 13316, 37099, 12379, 26579, 29631, 62928, 53492, 10768, 31330, 7687, 46684, 47690, 20268, 65723, 51895, 20025, 53709, 22526, 44404, 27998, 38416, 14678, 65905, 24418, 53207, 69499, 72891, 29242, 42418, 72668, 69435, 14673, 31053, 66804, 36332, 53889, 28107	yes
572	15824, 21608, 58315, 12475, 5825, 66462, 12200, 49348, 65409, 57108, 27273, 29593, 67376, 61518, 29331, 17950, 68388, 19442, 48876, 61162, 62268, 11306, 68720, 9259, 48304, 26662, 12455, 41482, 2140, 36037, 68814, 42308, 34510, 69445, 37257, 455, 19103, 3151, 62306	yes
573	55129, 28076, 40395, 52736, 28308, 7218, 14346, 44225, 65806, 7500, 51250, 4458, 57638, 67090, 10472, 39069, 7418, 43930, 64236, 48413, 3348, 69571, 69957, 45061, 34263, 4502, 41368, 69615, 41826, 69373, 68299, 52461, 52481, 4024, 61633, 45494, 9837, 25057, 54307	yes
574	57995, 6947, 25207, 42524, 3926, 33150, 65295, 5495, 69673, 27631, 18650, 62758, 71879, 19783, 2594, 36624, 53332, 61256, 24505, 5884, 54177, 9606, 33078, 10010, 43739, 69144, 66337, 31792, 22873, 18507, 40728, 25483, 34758, 3950, 35838, 10342, 47986, 61034, 30918	yes
575	38788, 28727, 48715, 52450, 12734, 48139, 26280, 72601, 68206, 69283, 43417, 23971, 53951, 36493, 70046, 64371, 58676, 63810, 57500, 11915, 18773, 44695, 14431, 7811, 57842, 71574, 36377, 45007, 6190, 56889, 3076, 60187, 10099, 69334, 74391, 37338, 37045	yes
576	69976, 58815, 26864, 162, 27964, 64828, 28901, 23004, 61949, 11322, 40075, 35144, 25517, 26030, 42772, 70311, 29878, 19780, 63470, 32016, 46145, 39808, 19909, 41800, 15821, 47283, 39572, 8929, 62972, 62027, 7048, 1262, 29109, 10494, 39940, 46512, 7393	yes
577	54514, 12065, 74487, 58340, 18622, 56473, 64337, 34216, 11984, 52254, 56795, 2114, 4605, 66871, 50368, 25473, 23922, 9835, 10560, 2672, 32552, 50921, 17772, 15066, 22869, 9577, 11567, 45140, 4841, 58998, 44979, 17569, 26190, 30255, 5961, 8581	yes
578	21488, 27956, 24651, 3322, 5648, 26263, 14693, 68387, 34068, 35280, 5125, 65190, 35992, 46008, 4127, 52838, 74196, 50133, 14758, 26493, 9251, 18885, 46758, 24053, 25813, 8020, 27283, 74244, 13457, 19373, 61290, 73344, 19486, 20098, 17079, 21232, 26065, 37980, 51649, 26779	yes
579	52896, 8057, 19430, 21949, 50805, 36583, 66978, 17585, 57527, 56602, 14499, 68496, 36880, 70779, 68852, 36122, 24665, 57894, 17855, 51706, 22959, 12324, 4501, 16433, 36868, 46000, 48005, 27987, 4445, 45526, 31781, 38268, 49637, 32820, 9077	yes
580	39062, 35408, 19252, 9458, 60681, 29131, 1024, 72786, 65247, 45267, 38415, 11887, 57011, 15251, 27776, 37402, 21816, 5318, 39674, 64047, 73636, 4061, 57267, 6974, 66655, 15170, 25774, 6504, 512, 1305, 74127, 49332, 1694, 62446, 21896, 2519, 65730	yes
581	66638, 34414, 5105, 70896, 20803, 40267, 23820, 50337, 9137, 11655, 29491, 54795, 10604, 37722, 58235, 23155, 44724, 18172, 1623, 57954, 53268, 11257, 59593, 61147, 28510, 49700, 51600, 3728, 65187, 9722, 5442, 11350, 51943, 8004, 69329, 22399	yes
582	48714, 17776, 72124, 36045, 51556, 10047, 8858, 11082, 72339, 39513, 14992, 6478, 9105, 61899, 63865, 32134, 7115, 54457, 3539, 1964, 7266, 8568, 48897, 12421, 36728, 14783, 55746, 70567, 35470, 20390, 71016, 64002, 53100, 67785, 55561, 15386, 39566	yes
583	2898, 17163, 71032, 68456, 27954, 59708, 20743, 377, 38161, 39903, 61647, 9183, 63384, 37266, 4651, 30856, 22802, 40248, 66903, 72306, 66143, 45555, 36235, 17993, 30676, 37531, 68839, 17450, 32824, 70908, 32173, 37432, 50100, 47159, 36163	yes
584	32431, 6392, 35550, 37256, 70936, 19721, 51494, 48177, 12094, 26076, 5187, 8110, 50612, 45155, 16235, 68665, 33613, 15973, 15755, 74104, 38578, 65021, 28554, 46565, 73984, 5417, 54422, 2505, 27860, 45579, 17071, 15353, 62166, 45289, 27198, 68696, 38906	yes
585	57793, 55512, 32135, 10767, 59050, 12937, 62995, 41082, 5976, 29075, 33978, 18302, 37001, 16797, 43841, 21141, 27196, 40762, 56812, 30815, 62625, 27733, 61231, 63450, 60871, 61042, 41890, 37640, 57943, 13520, 43823, 7444, 13378, 37587, 26764, 61967	yes
586	39333, 34686, 16611, 38619, 15154, 47824, 39763, 27285, 7441, 53026, 10899, 29647, 22058, 50324, 64361, 67218, 9875, 41685, 8470, 4220, 56905, 9802, 35628, 53950, 45671, 59398, 9646, 58864, 21689, 63414, 37489, 26290, 26480, 57215, 13797, 51541, 12940	yes
587	36601, 44043, 49603, 52182, 12632, 24699, 15371, 3175, 8562, 22351, 64719, 46452, 10390, 34656, 67406, 44505, 3906, 48249, 63786, 28273, 53790, 45231, 47116, 54614, 57922, 40390, 42421, 41621, 63196, 22773, 29286, 39761, 37223, 12635, 46891, 6569, 22332	yes
588	40948, 28449, 42192, 39663, 49766, 63635, 53693, 46341, 18399, 802, 31246, 45997, 55837, 3783, 35171, 58850, 19815, 54951, 60257, 51345, 21639, 38710, 15805, 56534, 34016, 49122, 61176, 13867, 73082, 64904, 28592, 3813, 59852, 67150, 24808, 21976, 33203, 72912, 10457, 9832	yes
589	19064, 28009, 34845, 45103, 20445, 4145, 59276, 31477, 7989, 22354, 26476, 23022, 57845, 68854, 40303, 26986, 2150, 65448, 7296, 27762, 22908, 66450, 7021, 38638, 73837, 19465, 37279, 25105, 72013, 33689, 7747, 63126, 27262, 37356, 60678, 30965, 30305, 39046	yes
590	14471, 49047, 20332, 25341, 65845, 47082, 33377, 3125, 37116, 12506, 3429, 3008, 52440, 67074, 41021, 46885, 31592, 14442, 14028, 63885, 6715, 31911, 27150, 25281, 27884, 61576, 6231, 7717, 70424, 56020, 3106, 54539, 11642, 28477, 50519, 47910	yes
591	54043, 64874, 43228, 36082, 7710, 61650, 45232, 37013, 14271, 63658, 39605, 28080, 15070, 13626, 18690, 10049, 37459, 11530, 42229, 63379, 9017, 8280, 43745, 20376, 31558, 67163, 68125, 22819, 20870, 7972, 65160, 37728, 57698, 24650, 14530, 67428, 63702, 66217	yes
592	69702, 26497, 16545, 45623, 10615, 72640, 12549, 71307, 70823, 35921, 71269, 28103, 14397, 62238, 44099, 33550, 64531, 74194, 7819, 41899, 20119, 30224, 41262, 10616, 35538, 31160, 387, 66135, 70977, 72254, 3889, 54322, 23721, 11635, 52442, 58366	yes
593	25090, 44508, 8018, 19547, 33439, 34109, 18974, 74394, 21233, 19613, 33422, 54086, 38923, 38393, 50068, 59810, 42207, 63785, 26295, 29594, 20442, 59543, 61599, 72271, 29874, 47431, 54560, 36795, 68605, 53262, 72533, 65479, 66948, 17728, 3345, 23493, 9238, 60289, 65028, 20264	yes
594	15493, 52786, 554, 18437, 70156, 71702, 42417, 55857, 50113, 71278, 13301, 41798, 59931, 26309, 56056, 32420, 67912, 73817, 68118, 71476, 25027, 30869, 58603, 19177, 19342, 71478, 51173, 70565, 58154, 16772, 11024, 67010, 64728, 36573, 6173, 14303, 30514, 51582	yes
595	55234, 29650, 11227, 41281, 49803, 39701, 49858, 29668, 66913, 33375, 36312, 69949, 38237, 66339, 28069, 67102, 50409, 41781, 43254, 40739, 34007, 21005, 65289, 3533, 38975, 51009, 22159, 55467, 48925, 3388, 10401, 7610, 30687, 51016, 42632, 49072, 57684, 35916	yes
596	23015, 50099, 44547, 38129, 38315, 69007, 55448, 2432, 73213, 16567, 20892, 29516, 61622, 23921, 8092, 2419, 64229, 46527, 15208, 46523, 53282, 25800, 69237, 73227, 6842, 9866, 40596, 14774, 44588, 30097, 24020, 66950, 43758, 26255, 13573, 3016	yes
597	31361, 14045, 26147, 67673, 51007, 63029, 37859, 72027, 42674, 71748, 59254, 59053, 73494, 27258, 43515, 51334, 58724, 25589, 43382, 70599, 19738, 36924, 57009, 44029, 66430, 48314, 2220, 73305, 47152, 53401, 5286, 49026, 25891, 5107, 61505, 72245, 32919, 55428, 34754	yes
598	37867, 52129, 30736, 51380, 34133, 28490, 70471, 19779, 46597, 40060, 44376, 60354, 36067, 166, 32531, 8668, 9685, 10645, 41467, 70994, 46020, 21620, 64602, 63979, 4483, 46007, 11277, 38150, 19634, 4758, 4618, 19803, 60360, 45547, 208, 58644, 57318, 25146, 68154	yes
599	57622, 54034, 41454, 37056, 22121, 61597, 14348, 3156, 67336, 14364, 8213, 67261, 60331, 70980, 53544, 73658, 35302, 7466, 42067, 35855, 12308, 58541, 19038, 40095, 28522, 55501, 22165, 63735, 67040, 25805, 66937, 23789, 14089, 49661, 19524, 54531	yes
600	40037, 43145, 69936, 67044, 16459, 59434, 19774, 3900, 28204, 68725, 28300, 15803, 48091, 778, 4134, 32704, 33955, 34300, 22400, 32772, 63416, 73632, 41874, 45883, 53131, 22145, 54309, 27934, 23486, 8946, 40649, 32143, 24628, 62651, 42127, 23237, 15274, 41292, 64075, 39718	yes
601	38523, 73130, 59411, 21132, 27979, 72751, 3230, 24603, 22983, 9196, 26886, 43271, 45925, 43519, 38696, 65529, 65105, 5029, 12199, 2548, 59631, 6811, 6775, 64763, 11220, 38693, 15360, 44676, 22017, 17004, 66210, 26868, 69197, 6766, 66043, 5233, 1632	yes
602	3771, 17005, 29894, 15075, 55159, 33356, 10223, 20652, 32466, 73540, 13616, 54484, 69314, 72693, 2895, 8511, 23055, 35493, 65108, 4429, 67916, 16083, 33510, 59258, 67695, 35360, 69240, 48310, 40960, 73060, 72562, 64316, 47375, 47900, 69019, 58361, 9405, 58928, 2316, 66654	yes
603	33948, 4932, 45091, 29756, 66971, 26470, 59184, 12494, 11165, 63733, 4014, 35414, 68616, 26880, 40984, 9034, 38069, 10445, 30817, 13241, 1286, 9169, 56272, 67297, 73668, 61618, 57606, 11553, 52933, 72017, 4084, 10548, 26685, 64583, 52272, 63567, 44132, 12947	yes
604	37142, 50443, 59249, 44984, 23480, 52321, 10544, 58255, 2030, 70460, 64549, 38222, 30954, 61389, 40816, 11667, 52451, 17205, 4881, 41785, 26322, 26678, 56663, 3992, 69394, 65933, 3026, 18337, 29006, 57994, 31801, 34952, 63954, 69597, 5058, 9553, 43640, 9657, 25034, 24042	yes
605	44691, 35886, 12816, 31239, 7302, 73186, 69391, 9091, 20727, 1326, 22521, 58636, 61224, 1469, 39285, 17167, 32458, 2595, 4125, 63601, 30962, 5269, 42935, 41070, 2511, 31093, 26347, 2155, 18295, 32084, 35531, 13372, 14490, 46546, 19375, 73061, 39144, 16706, 29863	yes
606	66616, 62687, 16810, 22241, 59608, 56636, 49713, 30748, 22204, 60341, 43623, 37966, 63706, 5557, 6482, 32928, 60116, 21002, 52395, 69010, 52582, 5719, 73081, 15063, 16576, 4497, 8301, 68916, 3947, 16013, 26691, 16811, 4706, 59157, 68847, 18245, 742	yes
607	16408, 57656, 4938, 28514, 27173, 41670, 10924, 30960, 13968, 27745, 14865, 67009, 1685, 58363, 45056, 31705, 25066, 22493, 54262, 48042, 64536, 65580, 6810, 3656, 53031, 43495, 67723, 74336, 33306, 28831, 9046, 22915, 56680, 58470, 33500	yes
608	48334, 45781, 18625, 39875, 50598, 58227, 18200, 65963, 69158, 71413, 73908, 48610, 20946, 27091, 427, 44399, 60182, 50461, 71034, 56393, 58988, 5377, 53697, 8523, 30335, 11416, 40092, 679, 66121, 20666, 66428, 55352, 71492, 8051, 25942, 19411, 38104, 17660	yes
609	11241, 10362, 58080, 4234, 22709, 29429, 71758, 25643, 9831, 23340, 48707, 21142, 54848, 38328, 52393, 37817, 37974, 7927, 64622, 47778, 6984, 68481, 72113, 21258, 63636, 65961, 70643, 13713, 54615, 7803, 7131, 18121, 4404, 50102, 44030, 49240, 38879, 32225	yes
610	23434, 60614, 38943, 65053, 65341, 65007, 69706, 26647, 68657, 22349, 52992, 17017, 17300, 54364, 1114, 72281, 27918, 51585, 62619, 25283, 6426, 15872, 4555, 31742, 6383, 58836, 44363, 21778, 54338, 42114, 43606, 651, 289, 2850, 20873, 30292, 13205	yes
611	68810, 47259, 25371, 50504, 60765, 40278, 43562, 57668, 1145, 33770, 55133, 47425, 26889, 7388, 60519, 65133, 18225, 18809, 5739, 25669, 53834, 25289, 22210, 65330, 53352, 50228, 32064, 61783, 49967, 45763, 62620, 595, 18310, 21851, 54629, 15868, 56956, 9488	yes
612	28374, 18204, 9619, 28216, 58071, 23680, 70711, 9728, 11206, 22232, 30377, 550, 339, 38811, 41539, 43856, 7582, 44138, 49157, 33570, 61349, 14964, 37462, 51678, 68866, 31998, 30796, 68043, 66972, 17901, 35145, 71601, 32536, 10771, 61502, 13294	yes
613	790, 60154, 19953, 74660, 23698, 31381, 39958, 13953, 8276, 4334, 74537, 9939, 42704, 50688, 35331, 67036, 26202, 4406, 52823, 1713, 25678, 72231, 53256, 23484, 6151, 46334, 16559, 35994, 4732, 41391, 41996, 41253, 57406, 72078, 30698	yes
614	32161, 27435, 65228, 33891, 32719, 39695, 33950, 10585, 25607, 60984, 70072, 19872, 29748, 32541, 7323, 35056, 34883, 16157, 31329, 1773, 9746, 52549, 64492, 6968, 61558, 28559, 49443, 6781, 42999, 9236, 68798, 34098, 68843, 11684, 21996, 69827, 20491, 49011, 23335	yes
615	58863, 17404, 27478, 33058, 4180, 43389, 52568, 55819, 32273, 10749, 16022, 12208, 59962, 45242, 17077, 52419, 64268, 3816, 32015, 1636, 70528, 73745, 53118, 43655, 27445, 65316, 23554, 50186, 9051, 10618, 39299, 56960, 57366, 52389, 5468, 34989, 41319, 12288, 51593	yes
616	50608, 39999, 65450, 46632, 32838, 10364, 6645, 40594, 4250, 32443, 47050, 58395, 57438, 4604, 60650, 42527, 650, 40154, 10652, 4772, 56027, 68558, 67646, 1424, 54510, 17470, 59936, 68133, 38716, 61523, 44679, 64639, 52824, 38449, 36832, 66908, 41923, 38812, 72989, 13469	yes
617	36051, 69157, 6591, 73580, 16427, 24381, 48228, 26999, 14013, 34295, 20103, 33009, 36280, 27087, 34893, 8530, 15673, 60320, 21670, 821, 32662, 6205, 60216, 51734, 29351, 69400, 6669, 64291, 49244, 6106, 23470, 65532, 32003, 26354, 697, 51855, 46596, 24354	yes
618	59432, 24689, 50242, 60279, 56476, 61488, 33864, 34256, 9562, 54703, 18975, 35905, 56384, 19594, 12771, 71122, 24761, 64040, 6465, 34772, 8955, 23979, 8935, 17867, 54854, 26965, 5890, 9123, 49359, 56941, 51347, 47, 33022, 25547, 46726, 3359	yes
619	10719, 64863, 30264, 19139, 71841, 57038, 23139, 16851, 29000, 57762, 9897, 55066, 38642, 19387, 26396, 38945, 29443, 68500, 25851, 12142, 1536, 3014, 31051, 73295, 56762, 50696, 28737, 41072, 59239, 8856, 6518, 33760, 16534, 65849, 35842, 72409, 56298, 15538	yes
620	42660, 46638, 66951, 56826, 40110, 67687, 67082, 10176, 74530, 48826, 927, 58738, 12977, 73805, 72698, 31643, 64914, 55674, 26876, 17057, 17461, 26134, 12171, 45836, 31820, 66973, 71039, 42627, 64359, 60014, 39552, 13770, 69331, 32406, 52119, 66921, 10367, 73711, 52402	yes
621	38055, 2567, 15541, 42783, 30379, 49383, 52847, 67012, 64339, 60112, 36065, 61291, 67939, 17711, 68533, 64102, 30539, 59443, 51850, 43222, 25107, 43674, 11006, 58164, 41910, 24105, 47884, 16242, 72714, 56582, 37529, 55581, 34520, 27583, 62015, 22334, 50177, 68367, 14186, 25550	yes
622	8532, 12763, 70691, 57578, 69509, 9767, 16531, 70932, 73160, 20296, 51745, 16034, 27544, 47150, 49092, 34909, 8757, 57607, 39212, 50131, 33595, 72032, 55901, 55241, 39613, 60011, 28968, 26816, 56745, 68645, 45441, 51972, 43582, 29178, 40770, 47280, 67060, 17043, 9028, 29767	yes
623	25596, 26781, 15970, 49775, 24648, 14136, 48369, 16483, 44801, 26468, 53355, 41310, 42206, 38938, 33783, 62038, 20654, 44708, 31702, 68468, 46122, 14650, 64490, 37152, 35098, 59284, 57908, 42991, 28349, 64364, 60717, 66817, 64341, 60214, 35192, 6317, 32269, 68337, 64167, 61662	yes
624	3024, 39793, 47453, 3380, 39112, 31964, 57367, 33566, 68286, 44472, 12602, 21284, 38294, 29888, 60920, 13194, 4786, 42620, 62668, 28123, 9275, 2858, 27633, 53009, 62577, 42586, 4315, 43511, 49484, 41278, 27876, 61351, 68769, 71245, 19927, 2709, 10775	yes
625	53968, 13976, 24780, 20271, 65407, 61062, 24559, 59389, 12068, 52269, 46451, 37177, 16569, 63853, 29067, 24703, 51297, 59567, 567, 74465, 71160, 42257, 30938, 15248, 47920, 51424, 43255, 55207, 26342, 24214, 47755, 52563, 9269, 50143, 5855	yes
626	17658, 60169, 12556, 47923, 10599, 20287, 17080, 37611, 71631, 37197, 24131, 65202, 52546, 12447, 56047, 44252, 41185, 58412, 31218, 7701, 45990, 11521, 69256, 64402, 13546, 40724, 31005, 25531, 1598, 62142, 73442, 40922, 14518, 55348, 48959	yes
627	13726, 36222, 25334, 46730, 68292, 45704, 45381, 58166, 22260, 18629, 8559, 41000, 11522, 69089, 39623, 64734, 63932, 9760, 7839, 21883, 38007, 54975, 44528, 59763, 47333, 74273, 1211, 27519, 63614, 72530, 22000, 29204, 17168, 61393, 65193, 15416, 9188, 73851, 8164	yes
628	70929, 22611, 65310, 26640, 20975, 36243, 65835, 66090, 10312, 54098, 55409, 21050, 24012, 44601, 15085, 25622, 4543, 18574, 56768, 26947, 72983, 37407, 15406, 11581, 48179, 34270, 56879, 10483, 23119, 73585, 8219, 5932, 42988, 38822, 56403, 56783, 11269, 26905	yes
629	42865, 18707, 27551, 31608, 16806, 15094, 72399, 53502, 16798, 28469, 35623, 50669, 30009, 50903, 56548, 49499, 1833, 71544, 65993, 2465, 38473, 29289, 20682, 22747, 10477, 52597, 35212, 35170, 31350, 49438, 4714, 3291, 40214, 31294, 40795, 48993	yes
630	68503, 56362, 52411, 46143, 63415, 31515, 67535, 61110, 12577, 55993, 2056, 41394, 67978, 1554, 72322, 51583, 54384, 52288, 47700, 26626, 55923, 18678, 2487, 22138, 46923, 22213, 13663, 7643, 28628, 48528, 12786, 45923, 72183, 8919, 28550, 53921, 50603	yes
631	58099, 20253, 64525, 6964, 4573, 43025, 59955, 20007, 50121, 14474, 1237, 52730, 879, 48405, 22196, 66460, 248, 60159, 25354, 12062, 11523, 9389, 45307, 44774, 16991, 45285, 26301, 25829, 3276, 19935, 55663, 70507, 19084, 52756, 58550, 45933	yes
632	44553, 24037, 14861, 62239, 42544, 27183, 1026, 54980, 24224, 53419, 37814, 66596, 41027, 30850, 41933, 20697, 19326, 56578, 67773, 20557, 50956, 19201, 29909, 67059, 58273, 54489, 16760, 35698, 34174, 17766, 24188, 61782, 14162, 26941, 73596, 5119, 41007, 61307	yes
633	39968, 68486, 26491, 56386, 46749, 14166, 179, 42030, 40701, 2067, 31965, 62790, 14262, 62408, 59120, 69562, 33941, 55416, 69044, 11841, 31113, 48760, 73514, 27850, 6126, 58045, 45865, 66416, 33195, 19936, 63024, 37243, 34995, 38270, 33092, 39997, 33199	yes
634	49584, 42976, 74311, 56535, 72014, 50564, 49690, 27105, 71010, 55924, 49197, 51471, 2702, 14211, 26689, 44079, 26642, 14778, 23667, 14875, 10568, 2654, 53821, 68569, 15861, 8826, 63722, 14622, 11053, 63619, 49544, 25766, 3352, 9691, 1373, 41239, 37739, 68691, 23041, 41497	yes
635	57424, 16579, 12882, 63283, 13945, 13601, 48918, 67577, 62318, 56479, 62563, 64694, 17884, 25840, 7864, 33781, 68384, 27915, 25491, 9899, 17640, 32641, 70574, 15446, 73950, 54551, 33416, 40998, 25182, 15684, 2033, 66421, 33125, 53330, 22141	yes
636	39389, 5248, 62635, 66326, 18917, 62960, 38656, 60048, 53177, 325, 20048, 61532, 15623, 33512, 27229, 24395, 33408, 52895, 42700, 54356, 62641, 24446, 58866, 45073, 58658, 70124, 655, 64898, 74526, 3737, 48301, 65561, 9530, 4206, 43441, 354, 36172	yes
637	14252, 66561, 4181, 65471, 19174, 73112, 27461, 29881, 48782, 60261, 74185, 20842, 55632, 71410, 14246, 58975, 55830, 19893, 53601, 33282, 35607, 73686, 4846, 72899, 7406, 25801, 48387, 74453, 20432, 46051, 42282, 15543, 74510, 50249, 71257, 19710, 61697, 40601, 32587	yes
638	34636, 71921, 38445, 44475, 43357, 3585, 17035, 47182, 27736, 42388, 69614, 34652, 8106, 13264, 51045, 52753, 40868, 5704, 40647, 71425, 52437, 67073, 29680, 10195, 19694, 23847, 16211, 32394, 56753, 6979, 12234, 579, 58754, 59767, 67720, 20886, 44977, 62123, 42284, 1611	yes
639	56149, 63187, 30738, 46673, 42459, 64248, 1921, 40954, 23395, 29463, 8146, 44063, 38549, 16379, 22392, 18984, 45235, 50697, 50871, 6017, 3030, 28883, 7350, 41909, 43244, 74397, 67642, 12416, 22714, 40111, 61847, 28917, 49918, 17174, 45496, 17319, 62812	yes
640	18911, 3862, 24203, 28642, 28270, 15681, 13021, 11102, 60757, 34868, 73549, 50205, 6763, 25198, 18314, 64237, 41609, 65125, 70808, 48198, 63511, 35726, 17850, 61566, 33841, 43766, 18968, 10762, 16178, 6721, 37254, 58010, 49568, 6168, 7590, 32022, 29570, 22034, 24717	yes
641	45243, 54706, 51283, 2224, 454, 70337, 45882, 58034, 2870, 20010, 32176, 35523, 7544, 46549, 39507, 29377, 16430, 22904, 65387, 9846, 66811, 56863, 23953, 23453, 68944, 70713, 30806, 35374, 25188, 37978, 10667, 30131, 50542, 34551, 57172, 18849	yes
642	20336, 24678, 55297, 69405, 42693, 15175, 60053, 68187, 14846, 15160, 6427, 12782, 59883, 39917, 60612, 8107, 28088, 18060, 20939, 70982, 66265, 34371, 50188, 68421, 11470, 61325, 74182, 58220, 52871, 41983, 62064, 26569, 28864, 5589, 5430, 57584, 49050, 10734, 24075	yes
643	2482, 66628, 37823, 57481, 54736, 41626, 71118, 29648, 65505, 53107, 7434, 37301, 59410, 52714, 11614, 72203, 39591, 70277, 40399, 63827, 2668, 37158, 51652, 68183, 6562, 27718, 9904, 31753, 60797, 37840, 51732, 55099, 14040, 45386, 45006, 28741	yes
644	44409, 53097, 67767, 10013, 54319, 31256, 44171, 30495, 52795, 36938, 8538, 2503, 58336, 70653, 26724, 72310, 62616, 21247, 15090, 66807, 2662, 8134, 9255, 32409, 3021, 6878, 9266, 42062, 10936, 7026, 21457, 21543, 65022, 51090, 3421, 7273	yes
645	57198, 15047, 43720, 72460, 1386, 12212, 28572, 35502, 56633, 19471, 12307, 38753, 14355, 31446, 62181, 50813, 72434, 5516, 71338, 4209, 18559, 28551, 42314, 39857, 3880, 42665, 28420, 67860, 55917, 5665, 49384, 11538, 51843, 39921, 13451, 5361	yes
646	29494, 69855, 45944, 17686, 58357, 55465, 21771, 65249, 27474, 51272, 13763, 23730, 50928, 4727, 68103, 5389, 55340, 58239, 48524, 55005, 53616, 8303, 33103, 48511, 17970, 22606, 15333, 15635, 11829, 56661, 54066, 47786, 30569, 59770, 43742, 61920, 53826, 56516, 34988, 37541	yes
647	55704, 65052, 9922, 46772, 16953, 69609, 52647, 7084, 16275, 43558, 20110, 17853, 40955, 10675, 57013, 35184, 55020, 37259, 44208, 12430, 15431, 17547, 17967, 26766, 54644, 74469, 9460, 33478, 17287, 19360, 64384, 12886, 47963, 38361, 49085, 8549, 8959	yes
648	2289, 65868, 4996, 1053, 11559, 1451, 58283, 22421, 44253, 3904, 40611, 8759, 60693, 51296, 48445, 65287, 13253, 3667, 45034, 63248, 37159, 61794, 43747, 11949, 49308, 28942, 55774, 5001, 35687, 38091, 68293, 34049, 5379, 62292, 34649, 35431, 64324, 53674, 48431	yes
649	12846, 42669, 69062, 26985, 2095, 60727, 48153, 58291, 49049, 31029, 8968, 29995, 5138, 34707, 22124, 68929, 64981, 21640, 57576, 72844, 70860, 4516, 10754, 36005, 58351, 60602, 56605, 8590, 16239, 10173, 61444, 50796, 9919, 40940, 37011, 4056	yes
650	7221, 32771, 24843, 61734, 30453, 6255, 11446, 31567, 13450, 59060, 14967, 53678, 37156, 5989, 27588, 23513, 72138, 17904, 2787, 68319, 7756, 64023, 24705, 63615, 49772, 52989, 42409, 15866, 40648, 17707, 55747, 33748, 20912, 15630, 18103	yes
651	61161, 25446, 26012, 14584, 60856, 51002, 48444, 49551, 43114, 40014, 64853, 71422, 23609, 71328, 37842, 51189, 19144, 69028, 2429, 73730, 39916, 36185, 49632, 57949, 23812, 67662, 22498, 45778, 41478, 35701, 15328, 61258, 41905, 45910, 8643, 51509, 50372, 58767, 58609	yes
652	52607, 42962, 67007, 54225, 55493, 1213, 43524, 63901, 27749, 5809, 64743, 61106, 64633, 4629, 8930, 2211, 5663, 41894, 9677, 17538, 42243, 71317, 49068, 6573, 25277, 69279, 35024, 25380, 26739, 43727, 51520, 41329, 24320, 34624, 51428, 59651, 8319, 55380, 14218, 2019	yes
653	11637, 73759, 27949, 35261, 54459, 55007, 28908, 43392, 70628, 62491, 40146, 26972, 13985, 62157, 57662, 4362, 65567, 65680, 27913, 68216, 22678, 71833, 15563, 52873, 64631, 13311, 261, 64331, 65218, 63500, 33044, 24099, 1069, 6674, 4098, 40393, 63670, 40190, 7763	yes
654	61410, 1315, 61131, 58436, 31601, 66150, 71139, 40702, 36195, 26439, 16893, 31194, 31180, 52762, 9730, 50344, 72021, 39391, 65990, 49724, 9848, 29930, 1149, 26800, 68446, 46558, 23172, 73219, 19297, 2747, 50183, 64789, 48780, 28360, 67079, 58811	yes
655	73802, 68168, 43956, 1089, 32405, 48194, 70906, 64946, 58879, 66233, 88, 74573, 25533, 45746, 7621, 38671, 15310, 37087, 25237, 61517, 59688, 16446, 56105, 22775, 6256, 49103, 74043, 49316, 64685, 40268, 17793, 66822, 23873, 13927, 13582, 43969, 57533, 815	yes
656	49090, 28612, 65451, 37660, 15120, 55888, 43872, 61344, 5390, 36369, 36766, 30566, 63870, 13039, 16910, 43125, 673, 55403, 51721, 24237, 3986, 15584, 61098, 21552, 8732, 27306, 48347, 40845, 25518, 34858, 20009, 15499, 67087, 38885, 45230, 4922	yes
657	19830, 37174, 1783, 7773, 43230, 4245, 30603, 56095, 39066, 32543, 18162, 43079, 17562, 42816, 68338, 33642, 35477, 54700, 14428, 21781, 21905, 72243, 25634, 40717, 61457, 26731, 74233, 13944, 26355, 40497, 38911, 15451, 58507, 37915, 32607, 48403, 28916, 63253, 47180	yes
658	18740, 18836, 16562, 39166, 22880, 26242, 38088, 3515, 49263, 48829, 48785, 1105, 59491, 38679, 68578, 4223, 1816, 60044, 45098, 26803, 60680, 32590, 56442, 61539, 60063, 2955, 72049, 9651, 59468, 43536, 6956, 13446, 58295, 4622, 69327	yes
659	17563, 50775, 57313, 38227, 32544, 62202, 60010, 59925, 46076, 65921, 640, 28398, 2777, 59660, 42908, 9896, 40039, 70583, 16875, 480, 47219, 65083, 17085, 74123, 23132, 28607, 9157, 65030, 230, 30466, 51813, 74065, 49130, 14538, 23557, 19434, 7921, 62592	yes
660	15945, 66229, 10060, 64588, 23394, 37044, 45959, 50017, 38997, 43205, 26962, 69749, 19855, 2864, 29624, 74546, 25496, 44316, 44064, 46784, 55765, 64783, 55835, 66813, 11270, 26066, 48015, 15421, 39752, 3476, 3099, 47078, 24417, 7675, 39438, 46768, 11902	yes
661	48698, 23309, 14755, 68550, 62360, 43408, 9621, 35168, 44121, 31376, 28726, 1578, 50192, 39849, 16913, 15078, 73029, 1431, 43279, 63509, 5523, 41219, 56414, 72207, 25903, 6253, 5892, 53306, 54709, 73725, 65361, 26399, 72540, 1054, 8412, 45621	yes
662	5419, 47750, 14880, 28024, 32831, 31435, 17692, 61272, 46736, 46090, 36812, 69133, 28790, 41303, 30735, 46773, 49837, 27561, 8978, 46355, 2962, 16057, 14317, 20234, 4040, 29946, 74284, 11649, 63028, 37119, 64398, 18565, 54428, 12649, 62261, 63587, 58419, 41583, 54776	yes
663	21137, 53086, 31486, 31577, 35276, 63375, 46513, 31179, 49074, 35435, 31559, 9656, 31914, 46619, 24285, 57999, 39541, 54445, 9533, 51772, 44612, 20595, 74163, 70734, 16330, 8851, 45082, 54353, 40121, 7217, 4908, 57469, 2841, 51727, 59164, 61882, 38085, 20544, 4925	yes
664	30173, 14032, 59992, 57415, 369, 21691, 49086, 71517, 63082, 23090, 52094, 28990, 47634, 42763, 44452, 13359, 50524, 58159, 59481, 44368, 38098, 22712, 7895, 31856, 36928, 23955, 23860, 34673, 54610, 45520, 35041, 14012, 8311, 15110, 30733	yes
665	24341, 21599, 2414, 19878, 71214, 38146, 31155, 34434, 67602, 52878, 37700, 55471, 15346, 34622, 51406, 34203, 51451, 64267, 18081, 27873, 17925, 64744, 276, 22144, 15593, 41691, 48140, 5062, 30783, 21419, 31541, 4937, 44629, 1016, 15733, 45400, 64310, 46609	yes
666	46464, 29081, 10123, 56252, 16791, 66992, 42248, 59081, 68450, 46043, 17087, 63962, 15511, 52476, 22049, 12484, 63299, 16160, 58477, 64328, 29714, 28980, 16116, 61951, 11121, 72283, 65842, 68974, 46349, 62595, 64032, 48529, 8602, 6306, 885, 23117	yes
667	5140, 48564, 52891, 1170, 72461, 43322, 31483, 47561, 2999, 12259, 72937, 31650, 66478, 22229, 40931, 23312, 23731, 45017, 3700, 24357, 13999, 28340, 487, 20312, 18562, 30586, 21550, 42269, 3752, 3336, 40232, 5854, 17075, 14557, 70453	yes
668	27027, 69018, 46975, 45121, 41451, 51750, 26073, 64245, 40130, 10589, 42081, 38695, 36081, 42411, 56815, 48257, 18360, 24613, 66241, 5943, 15448, 26180, 73088, 35869, 26006, 18207, 2299, 17839, 59291, 36885, 24764, 27135, 5234, 52788, 38824, 62342, 46092, 45874, 34328, 39499	yes
669	48480, 4259, 45658, 46353, 66386, 61634, 25855, 30579, 26631, 25864, 19142, 867, 69308, 72982, 21822, 73435, 10164, 26330, 17152, 32906, 34430, 39539, 14647, 2616, 60762, 25915, 44668, 44899, 19865, 52367, 22635, 58284, 66218, 63813, 34130, 67202, 12474, 32201, 34861, 37572	yes
670	37185, 287, 34218, 29238, 60938, 62214, 34497, 23662, 68394, 71173, 41906, 58055, 15971, 13145, 50210, 14459, 12798, 704, 30882, 74532, 20799, 71995, 70370, 14942, 72581, 5403, 43624, 40853, 28277, 6966, 72948, 39220, 47253, 68428, 59117, 35827, 32121	yes
671	13053, 17400, 30952, 69791, 53014, 35191, 34384, 53105, 36857, 58660, 56052, 71831, 20319, 9878, 2532, 47120, 25863, 2282, 5226, 66164, 49749, 42806, 29911, 47649, 6936, 58418, 16134, 25684, 52050, 71727, 51848, 61105, 69870, 73402, 38353, 69637, 28295	yes
672	47961, 56761, 40777, 48537, 26650, 21456, 56158, 57449, 24875, 9402, 6771, 57463, 68891, 36064, 71659, 8267, 40528, 65944, 7994, 25388, 50567, 48873, 30114, 30956, 69057, 49729, 49468, 58871, 62208, 72978, 29729, 16996, 25241, 72270, 6491, 66354, 70518, 67638, 2743	yes
673	28972, 40657, 2162, 3103, 35629, 66643, 60401, 68831, 28317, 26538, 32256, 30363, 48845, 6701, 68426, 7903, 74216, 26191, 36360, 52417, 57834, 22511, 47379, 68571, 24240, 1299, 3045, 5500, 42181, 3137, 2842, 66274, 69433, 66084, 25169	yes
674	16154, 42518, 42279, 63171, 62552, 6258, 36362, 31917, 47069, 74507, 41161, 30095, 26474, 45504, 30540, 33247, 74120, 63530, 56603, 62975, 23563, 71632, 27096, 61941, 67835, 48605, 2958, 34661, 70852, 70485, 67664, 42033, 2269, 16230, 4291, 54051, 32940	yes
675	55804, 7063, 9592, 3749, 22861, 40458, 9761, 33849, 39462, 66755, 51201, 54724, 8308, 14901, 64967, 17327, 66850, 21983, 34404, 9476, 69775, 37334, 37339, 45115, 21420, 53216, 44212, 10455, 4120, 46075, 42574, 57189, 23242, 55521, 35155, 6337	yes
676	37196, 16462, 72994, 18817, 7155, 4355, 71792, 60547, 20691, 7141, 47348, 48364, 48329, 7199, 13805, 60205, 3567, 2171, 9625, 31654, 7414, 43450, 54178, 19123, 36137, 1912, 11907, 49480, 45260, 52331, 66451, 33347, 14612, 66842, 45241, 44430, 29021, 53596	yes
677	30913, 60321, 34039, 21130, 29202, 45269, 20672, 56282, 26634, 23591, 56176, 31695, 70290, 55850, 12759, 26530, 2139, 8096, 2794, 9876, 45277, 61836, 48085, 33380, 40206, 44, 61776, 29464, 38198, 50517, 25564, 16674, 26451, 41248, 5617, 23893, 17207, 16072, 72841	yes
678	10023, 28408, 1219, 63291, 64193, 37486, 24045, 60859, 17476, 70649, 58466, 30551, 11916, 28159, 42525, 66516, 10766, 61656, 25143, 31932, 53360, 72490, 59386, 52355, 72139, 64641, 49305, 61553, 66832, 50391, 15442, 34919, 35692, 27126, 67185, 66028	yes
679	661, 34220, 3595, 56758, 11969, 9209, 45885, 67575, 22444, 46647, 42900, 15807, 35562, 46658, 7327, 10851, 19897, 73429, 29063, 57804, 54726, 20272, 55961, 50703, 44911, 32093, 44888, 20927, 29929, 17509, 3242, 55406, 74133, 69983, 34465, 72618, 1252, 71261, 21477	yes
680	70063, 25519, 48710, 21627, 58543, 50055, 14229, 43479, 29865, 8631, 31287, 40962, 68915, 36708, 23232, 71667, 21471, 8875, 22454, 27671, 73859, 724, 6528, 9370, 11464, 66991, 32941, 16319, 67450, 13240, 21955, 2618, 29457, 49270, 54804, 38140	yes
681	37993, 54603, 53201, 44851, 31516, 70138, 11142, 68853, 725, 73701, 1936, 49179, 39580, 22470, 8526, 40346, 56857, 46611, 66523, 591, 17977, 24282, 71186, 70552, 53312, 43366, 32780, 40943, 9947, 53845, 74571, 20864, 49951, 36907, 14105, 69671, 67614, 60663, 35068, 16669	yes
682	55084, 35839, 59451, 44643, 63938, 70425, 54205, 41837, 64421, 70648, 5900, 62152, 49520, 28095, 59310, 20791, 5490, 68690, 55767, 49530, 40629, 32676, 53094, 43197, 19563, 63275, 9071, 48520, 69968, 6980, 68366, 14933, 70101, 39838, 22852, 5121, 29038, 44614, 528, 57736	yes
683	69442, 13054, 4978, 33323, 60486, 49788, 39931, 67228, 64618, 52709, 16944, 40570, 26511, 3179, 50997, 41463, 12004, 53276, 45142, 1044, 10962, 65264, 30805, 17221, 38680, 17866, 4965, 19727, 41447, 59671, 69277, 61209, 71305, 18488, 28278, 50593, 55260, 62852, 58038, 74052	yes
684	66836, 46157, 40460, 38766, 48028, 54524, 72765, 2951, 43247, 2460, 51409, 40033, 69543, 64989, 40438, 22312, 32883, 41330, 26, 3427, 34137, 9525, 29634, 47860, 40771, 19348, 57403, 6084, 32507, 39733, 61958, 2301, 21696, 45113, 40554, 61165, 12081, 20328, 44762	yes
685	56009, 57490, 59725, 221, 66286, 42185, 24396, 60578, 57677, 13702, 63013, 19167, 61149, 10165, 128, 38142, 22190, 20832, 57783, 2592, 67955, 56376, 35898, 37951, 24824, 36521, 5841, 28926, 3633, 30060, 31665, 42130, 6184, 9004, 56809, 63427, 44731, 71623, 9797, 42882	yes
686	20545, 52917, 20572, 48870, 5925, 21956, 14073, 45143, 6274, 60030, 7214, 69493, 49002, 44242, 71362, 3577, 371, 6937, 21770, 9246, 57974, 20236, 3399, 7793, 1665, 39737, 7397, 43214, 2436, 50171, 55170, 38172, 22984, 7315, 42740, 15694	yes
687	14855, 33174, 16047, 46089, 47836, 3712, 54634, 24114, 23946, 73357, 23845, 21368, 8037, 63542, 65637, 34436, 3263, 71647, 9565, 18838, 11786, 20398, 10083, 42803, 36853, 43100, 55887, 26616, 69276, 29550, 69896, 35612, 52572, 61089, 44767, 28683, 15992, 61023, 2728	yes
688	33745, 44108, 44303, 7024, 61246, 24218, 11886, 19828, 18680, 27516, 23510, 21977, 34046, 30239, 59058, 21105, 47422, 52295, 1561, 2285, 9158, 49477, 57860, 69623, 69937, 29719, 27535, 49739, 26568, 69945, 71669, 48935, 60096, 41529, 33437, 15049	yes
689	49552, 63463, 66957, 2273, 31398, 66483, 31628, 58842, 46766, 45019, 10636, 17854, 45429, 45124, 56703, 34848, 58355, 59234, 30630, 51832, 50651, 64081, 57494, 57918, 70321, 31077, 57137, 42870, 58990, 25443, 71793, 27864, 67801, 51508, 27395, 21673	yes
690	14380, 31018, 7689, 32120, 35333, 7027, 15324, 941, 59040, 66500, 49151, 60242, 5215, 67096, 2461, 49699, 26701, 8555, 3393, 33060, 52674, 36420, 7634, 28658, 17768, 31351, 48149, 26233, 5753, 39582, 69098, 40342, 466, 73660, 63050	yes
691	33594, 44184, 36140, 10602, 8329, 26897, 32785, 50185, 23327, 5145, 50966, 24842, 2837, 3682, 9288, 37472, 32389, 71816, 2456, 67405, 54695, 44735, 15701, 57543, 73504, 14592, 379, 61588, 11031, 66877, 59062, 22805, 7031, 54346, 6751, 73012, 49463, 2877, 48920	yes
692	38033, 58248, 12273, 69030, 41023, 47126, 46760, 22257, 18346, 47568, 21549, 38292, 37373, 28862, 1522, 51396, 6003, 36506, 29369, 67866, 11976, 32401, 54527, 6992, 19334, 32955, 49549, 3941, 838, 1140, 74567, 12342, 24948, 5474, 70563, 56807, 1695	yes
693	59662, 15793, 8764, 13697, 50770, 15059, 19492, 74144, 26248, 2800, 51579, 15365, 51465, 48821, 37798, 56580, 45365, 32333, 52947, 24213, 60949, 29322, 61608, 41602, 10629, 45799, 21154, 35238, 24126, 52844, 65997, 7108, 28047, 12020, 30846	yes
694	47521, 33446, 71170, 34616, 4748, 5333, 20604, 17602, 41956, 12346, 61329, 60436, 21657, 14646, 7915, 6551, 72962, 26801, 40809, 62047, 73652, 7880, 66335, 63604, 28452, 26573, 49427, 19221, 62554, 44866, 14675, 44864, 63716, 39714, 21337, 63734, 34313, 31821	yes
695	2909, 11145, 60075, 18429, 39767, 42119, 63230, 44011, 55755, 43632, 9895, 63429, 35262, 1046, 51696, 29246, 18955, 59796, 43265, 39455, 58586, 3517, 70190, 29507, 18177, 44264, 10588, 52799, 2022, 35002, 56801, 72237, 35267, 15164, 23573, 71794	yes
696	63777, 55223, 37198, 56331, 1583, 43576, 38061, 23454, 72848, 60338, 17632, 12091, 40242, 40123, 39819, 14258, 64612, 61965, 8373, 35161, 70394, 33597, 28038, 61237, 987, 63185, 48411, 57594, 353, 29921, 26609, 42888, 70601, 48530, 37295, 57911, 32996, 3394	yes
697	61753, 45026, 35303, 27140, 68667, 33003, 74619, 67565, 64937, 39547, 5147, 53122, 46133, 30898, 10261, 35464, 53308, 38916, 10582, 46467, 52456, 43493, 4214, 29845, 52361, 34990, 51728, 54008, 59638, 60157, 11502, 64166, 56498, 12878, 41998, 73035, 61236, 72784, 3501, 24337	yes
698	57273, 61007, 67, 73521, 70429, 23733, 25394, 74085, 67089, 9807, 9768, 2499, 60099, 13779, 48670, 1342, 6613, 39064, 14270, 48097, 58622, 65706, 16847, 50803, 14735, 68879, 28918, 46116, 15607, 58259, 67973, 32766, 48514, 45300, 34530, 40454, 29558	yes
699	71368, 7450, 57653, 49797, 4574, 59162, 17304, 40599, 2886, 59176, 6599, 52473, 45819, 55427, 56825, 72876, 14433, 39440, 44435, 53421, 51443, 74512, 48628, 51759, 22969, 4006, 69023, 51846, 60744, 12311, 14053, 67561, 37311, 18278, 18998	yes
700	47208, 7922, 45024, 29210, 58365, 64683, 31145, 59545, 53411, 70704, 74026, 6358, 13379, 23373, 67921, 58168, 54717, 59196, 19053, 12590, 68239, 33956, 60316, 18987, 1864, 828, 53016, 60148, 63271, 6954, 46540, 25697, 44991, 74427, 51457	yes
701	16303, 74075, 30442, 43442, 6460, 999, 30122, 16323, 35453, 74633, 70186, 12750, 19860, 67904, 17803, 30293, 64185, 10624, 23319, 33575, 69982, 51550, 70466, 26734, 73190, 25155, 69259, 53637, 54503, 11936, 63339, 42579, 7161, 14827, 12605, 62863, 18330, 49555, 26398	yes
702	61742, 33933, 54016, 38941, 20042, 37797, 9397, 54361, 41982, 73880, 55934, 31955, 61923, 74352, 72052, 45739, 58174, 3612, 12994, 47472, 23539, 19696, 56121, 68308, 52291, 2559, 27434, 30276, 4340, 2638, 73105, 40071, 36779, 73152, 66591, 54593	yes
703	72781, 21385, 18091, 13821, 9672, 56793, 44878, 67469, 901, 53661, 11950, 34479, 8813, 40534, 70473, 64900, 66458, 26674, 32427, 694, 48307, 4865, 64885, 67843, 4507, 37566, 36616, 53770, 29115, 23356, 71147, 18472, 45356, 1550, 69420, 29314, 16886, 41654	yes
704	72596, 66074, 39493, 46880, 15752, 16148, 21950, 55664, 8855, 52916, 58157, 69289, 296, 4567, 39670, 25088, 33076, 31357, 45419, 61338, 38425, 44473, 27233, 36913, 30084, 68661, 54110, 57202, 67764, 64607, 67941, 13733, 42708, 54922, 47423, 50008, 5159, 7597, 49456, 58415	yes
705	17321, 12890, 49247, 64, 5152, 28925, 12188, 19982, 74064, 33094, 54324, 72232, 27986, 56579, 66207, 44560, 63712, 35490, 50571, 1331, 5610, 6584, 73899, 15354, 39509, 24445, 11421, 53830, 25981, 36522, 13608, 1668, 12618, 70232, 33063	yes
706	28730, 42427, 47556, 40691, 20856, 46223, 15796, 11358, 59536, 542, 32035, 28176, 35348, 17001, 48451, 59205, 47135, 2940, 14491, 22735, 28593, 4923, 43570, 70530, 22991, 2521, 55040, 42636, 7996, 70373, 50730, 15553, 55577, 4828, 62828, 22820, 42923	yes
707	34756, 5909, 9112, 35239, 16695, 23292, 28535, 63508, 8492, 64378, 21666, 67119, 446, 348, 34136, 23253, 6333, 51022, 73480, 58713, 21500, 61506, 44902, 74304, 71927, 44257, 42591, 61443, 29458, 50883, 4023, 13454, 8321, 59088, 52831, 50026, 19752	yes
708	48526, 55156, 73479, 3015, 55570, 1393, 67605, 6278, 72445, 32826, 44847, 19437, 10909, 73726, 26321, 55983, 60702, 50544, 0, 37582, 3105, 32742, 34751, 73694, 45811, 24555, 59287, 2310, 43020, 8121, 38483, 41338, 35380, 59588, 71846, 40664, 23735, 31453	yes
709	35426, 35626, 74027, 4005, 29395, 42713, 73247, 46837, 47411, 13173, 9989, 70307, 33012, 32262, 32157, 62886, 18496, 50015, 8469, 44065, 17555, 12449, 21522, 1530, 39643, 43772, 64590, 23430, 56338, 48658, 14371, 30042, 65210, 9791, 26143, 68827, 47233	yes
710	72734, 48517, 31700, 14149, 11931, 66396, 6807, 38631, 67928, 21622, 68897, 55517, 44909, 58286, 449, 60179, 8159, 34502, 5116, 46524, 45618, 62814, 41599, 61649, 28609, 64672, 38787, 29867, 14740, 69269, 40227, 16677, 18224, 23648, 32569, 8655	yes
711	3615, 60834, 70986, 35991, 51620, 26024, 33558, 17260, 67732, 13802, 74635, 11849, 69525, 56445, 54719, 68357, 58370, 68169, 50388, 1943, 44728, 25069, 26611, 67130, 64956, 30861, 28259, 50597, 18176, 15011, 30626, 9551, 36409, 40690, 61018, 47404, 28608	yes
712	57460, 53320, 25952, 1842, 7062, 44186, 62638, 74157, 62576, 15975, 68799, 49031, 791, 60311, 50939, 46555, 5012, 68098, 74451, 65179, 26550, 33520, 7227, 667, 16166, 73700, 59621, 2953, 56431, 70087, 39604, 30935, 37424, 12025, 2401, 62058	yes
713	52837, 27610, 50369, 6248, 50460, 56413, 71708, 52211, 71239, 24663, 67776, 47897, 61948, 65693, 36354, 45039, 3296, 2255, 7901, 5728, 105, 7081, 15143, 59658, 28835, 30221, 10509, 65304, 52644, 4495, 56460, 13511, 51904, 4059, 58973, 41416, 65714, 17641, 44734, 37495	yes
714	35853, 67520, 36501, 15855, 25047, 55430, 44755, 20826, 52654, 38534, 32862, 49046, 21285, 26707, 21219, 2789, 27687, 45771, 54679, 34089, 27833, 38219, 2646, 55145, 4046, 4481, 64634, 65608, 37492, 65449, 63036, 31379, 46973, 35899, 58441, 31059, 23330, 48268	yes
715	64292, 2280, 46887, 62283, 2696, 14035, 18350, 2748, 51980, 39544, 43942, 1495, 49830, 1504, 47087, 7391, 60992, 23205, 56429, 20851, 40431, 57183, 16346, 51993, 1647, 45099, 45470, 35888, 2194, 39647, 13949, 21022, 5780, 70155, 13291, 60664, 5893	yes
716	37898, 49194, 43267, 4246, 54656, 50814, 69989, 14943, 52263, 27347, 30662, 22993, 34139, 6621, 35263, 46825, 25945, 15069, 73666, 57667, 14808, 60292, 42457, 26902, 58538, 8444, 13104, 20919, 10478, 41146, 57445, 59455, 20983, 12099, 31422, 40115	yes
717	31423, 53509, 48499, 32395, 51071, 57433, 65072, 7150, 50621, 10085, 12337, 56360, 24425, 32730, 62476, 72198, 17638, 65446, 15949, 11609, 3411, 25061, 11492, 28444, 26194, 56942, 43372, 16428, 6, 41680, 5689, 27447, 52920, 39561, 39121, 31354, 39361, 907, 25636	yes
718	46154, 68142, 33695, 38136, 56126, 59137, 63625, 6971, 32530, 11064, 24672, 20567, 39187, 14857, 45489, 18763, 63332, 64254, 71767, 34160, 73137, 46699, 12784, 15139, 57007, 7097, 24996, 26822, 20715, 6261, 6529, 74074, 72098, 36635, 474, 24589	yes
719	10480, 152, 47101, 58049, 702, 28646, 50957, 7053, 17266, 49167, 40036, 29936, 38749, 13161, 68860, 4096, 61859, 61852, 5262, 4142, 16028, 1012, 9297, 16717, 19665, 14721, 71140, 60785, 66005, 38128, 3526, 42643, 4565, 12704, 7744	yes
720	53938, 27124, 47029, 25897, 62276, 3719, 72931, 27813, 43156, 13003, 57285, 10317, 4503, 17722, 68270, 17413, 2908, 59568, 25392, 67172, 23907, 22823, 45198, 23304, 8992, 14858, 38504, 61709, 21109, 10316, 63462, 65709, 16411, 37738, 31499, 17200	yes
721	8065, 34214, 31184, 12708, 40919, 51771, 24515, 34230, 3353, 8461, 71392, 41137, 21744, 38191, 13868, 33464, 42023, 42593, 44024, 22851, 32758, 72169, 868, 5287, 53138, 3711, 73372, 34945, 43153, 38167, 16949, 14298, 46506, 26482, 44634, 41315, 67463, 17520, 33756, 50373	yes
722	4491, 16631, 40881, 39113, 31346, 53135, 72267, 6081, 28995, 2093, 67392, 45911, 26836, 13523, 69159, 62711, 66743, 13380, 16728, 30416, 45991, 8778, 65063, 64458, 23952, 3217, 20498, 33011, 23329, 27808, 36433, 58752, 7695, 48487, 41197	yes
723	70593, 10812, 69619, 45029, 37436, 60143, 29364, 6440, 39097, 19380, 37571, 214, 67444, 36159, 61547, 59064, 28433, 30014, 9873, 843, 9411, 71497, 56372, 73995, 54089, 53837, 42472, 35699, 35508, 57713, 8956, 17409, 12727, 3668, 58728, 350	yes
724	6144, 13678, 18441, 35058, 37821, 59396, 24471, 62680, 48871, 14114, 51689, 6889, 57675, 24518, 39664, 41628, 34586, 4408, 2217, 57078, 62346, 4747, 54855, 4391, 51337, 47560, 36813, 67254, 49752, 32368, 47345, 58979, 54002, 24260, 45138, 73488, 63824, 31626	yes
725	12246, 15237, 50418, 69365, 31022, 1719, 34370, 55928, 32029, 69409, 52310, 7792, 9205, 16444, 46226, 62256, 49447, 43888, 74658, 70902, 73542, 70685, 60326, 56804, 46590, 2005, 55828, 42771, 43288, 3710, 38890, 55089, 73978, 9479, 70073, 18249, 17131, 16079	yes
726	3925, 24007, 60138, 19256, 11, 7611, 31280, 41207, 48378, 39836, 70773, 32605, 53863, 23788, 54693, 70136, 44168, 41092, 31267, 74468, 57332, 62290, 41006, 9168, 6053, 68887, 29989, 34744, 45, 14328, 1588, 40008, 1411, 46683, 33669, 59457, 65604, 30922, 6155	yes
727	69215, 31065, 42109, 13048, 13206, 27565, 63412, 15311, 41032, 13526, 36002, 40645, 56453, 47209, 64777, 51822, 35915, 67472, 10397, 53971, 9817, 31308, 49287, 33673, 72811, 40185, 63402, 40572, 54037, 15660, 1682, 3928, 54607, 46526, 40635, 50820	yes
728	52843, 37575, 45744, 28542, 63919, 54280, 28493, 19987, 58188, 59940, 27254, 52519, 9856, 21799, 45159, 33068, 26602, 36513, 18241, 66165, 62358, 41979, 49732, 40676, 43431, 45858, 13709, 36104, 26643, 36118, 70770, 60245, 69853, 70578, 41748, 15677	no
729	69960, 71225, 72357, 52821, 57399, 11840, 48222, 1712, 5488, 32298, 16309, 51969, 6088, 10957, 50699, 26831, 64711, 60471, 10839, 25324, 66408, 30398, 17603, 67424, 1920, 70625, 44585, 7148, 3977, 71242, 9198, 55309, 3748, 5323, 72604, 54744, 10006, 1652, 49580, 2439	yes
730	42564, 71586, 57376, 707, 15153, 34140, 22077, 17185, 64182, 37194, 23897, 21084, 20676, 51058, 70276, 31492, 45483, 63018, 7645, 73090, 56991, 50710, 54260, 5344, 61175, 25905, 33881, 51232, 34145, 49598, 61039, 11738, 13516, 25581, 44596, 8316, 28322, 33365, 16044, 60962	yes
731	9025, 53226, 25742, 24958, 257, 59625, 67519, 42876, 39678, 62495, 31266, 34716, 22389, 68056, 51212, 6776, 39601, 19370, 37733, 45053, 43967, 13412, 66665, 63514, 73770, 47724, 71062, 4909, 67698, 56886, 56281, 42153, 22941, 23936, 6902, 73826, 16685	yes
732	33834, 52159, 62990, 10765, 268, 35724, 50021, 13307, 67384, 52004, 69796, 65744, 4453, 39355, 65117, 43782, 29956, 73883, 11509, 72508, 73552, 57864, 72193, 42374, 5692, 54113, 14117, 59365, 74385, 18770, 44571, 47245, 26600, 35257, 70721, 6897, 19395, 45791	yes
733	49835, 42434, 63699, 30361, 42408, 18321, 47301, 66710, 66127, 1638, 69975, 67443, 10518, 21333, 43227, 12917, 26808, 30160, 13904, 53547, 9256, 62087, 15663, 12157, 57827, 61943, 34860, 16229, 28675, 8467, 49958, 62771, 69904, 16271, 53850, 69452, 58509	yes
734	63900, 39642, 37476, 5697, 28330, 14435, 40803, 17846, 33684, 30583, 36805, 72106, 40620, 22923, 54599, 31765, 40789, 58947, 18579, 29407, 20705, 41773, 62717, 2802, 25149, 71691, 27295, 22772, 8207, 40175, 36160, 25651, 51857, 66502, 49022	yes
735	62095, 52635, 35366, 29676, 36266, 60104, 51736, 54797, 27525, 65970, 50989, 56501, 39101, 58008, 72904, 63646, 16954, 15022, 69073, 59101, 15494, 19002, 45954, 46247, 68313, 59121, 63647, 18924, 17199, 47791, 14125, 62855, 68584, 21380, 6905, 4690, 23331, 28970, 72807	yes
736	58051, 68541, 54304, 26437, 55290, 50676, 10254, 44809, 66522, 43460, 36059, 16347, 32790, 33835, 2853, 17760, 10133, 7484, 22542, 59776, 68441, 6660, 49428, 1446, 55787, 60742, 54792, 60847, 7271, 442, 41937, 48756, 22043, 73052, 8867, 10059	yes
737	40590, 25045, 19316, 49998, 3810, 22, 41087, 11592, 40532, 6765, 31803, 35304, 27351, 31836, 57945, 58735, 30064, 29217, 45896, 36542, 13131, 36752, 56494, 73966, 57229, 66237, 17655, 9281, 52030, 70168, 25294, 12487, 11830, 17736, 15770, 54141, 69303	yes
738	66900, 44066, 13047, 3781, 17480, 67510, 23672, 71348, 71625, 865, 33657, 50330, 43566, 731, 72620, 27513, 27842, 44427, 37588, 36090, 48393, 22320, 7485, 180, 42292, 61828, 72128, 69676, 34971, 35832, 18921, 45348, 17671, 31366, 2670, 41649, 34678, 10888, 52038, 1758	yes
739	56422, 42036, 71806, 51938, 53229, 43846, 65269, 60433, 49322, 62514, 39895, 21392, 18509, 42513, 28545, 50530, 26802, 60197, 73512, 33882, 30848, 32516, 51610, 68401, 25018, 58909, 69504, 40332, 33729, 74246, 35971, 56669, 47004, 12309, 71323, 74402, 8611, 35213, 11434, 24754	yes
740	33633, 26667, 33366, 41612, 62458, 2391, 71061, 67306, 25004, 14748, 47272, 26806, 30456, 32987, 55984, 22562, 26503, 40793, 14667, 4734, 52460, 71907, 46112, 5591, 14429, 8802, 33442, 27125, 69548, 59173, 12258, 59220, 29500, 4638, 4652, 55540, 12860, 19458, 48308	yes
741	67692, 56262, 56278, 60932, 35702, 14968, 58318, 2632, 44948, 70117, 14239, 13302, 6485, 53953, 68871, 69311, 28704, 11756, 461, 740, 60451, 72818, 10142, 123, 54171, 52233, 24922, 29279, 42370, 70273, 53720, 2384, 67327, 48171, 21360, 23354, 55259	yes
742	45751, 61386, 64580, 69721, 19566, 36146, 56555, 57364, 20709, 22298, 68447, 71981, 516, 34282, 26571, 64720, 50794, 70885, 61929, 22497, 46754, 14413, 53592, 2623, 49395, 20353, 45171, 33346, 12187, 65808, 53993, 66659, 66212, 47439, 16615, 11293, 42169, 17410, 21029	yes
743	72704, 30248, 69516, 63889, 5508, 72868, 33220, 70894, 48154, 24016, 36674, 16785, 47605, 3787, 61380, 30942, 17683, 66058, 44999, 50231, 4119, 67894, 43103, 46956, 12510, 73744, 55873, 33008, 18959, 34343, 23147, 68465, 22308, 61600, 63438	yes
744	59260, 1389, 50897, 20097, 8226, 69712, 23608, 22154, 23882, 17145, 39807, 52208, 14407, 8950, 18260, 27944, 51861, 28565, 68781, 35678, 57456, 45396, 25490, 16753, 52492, 31945, 34403, 18415, 69091, 51926, 62177, 73614, 68167, 27216, 36983, 11243, 42851, 56068, 63411, 48805	yes
745	25186, 10279, 57603, 65127, 57861, 74140, 58096, 23879, 17929, 65368, 53944, 71903, 52011, 2901, 52912, 28804, 4329, 14269, 48903, 61573, 21255, 54480, 48242, 57747, 10416, 25028, 50809, 40299, 3551, 39436, 9152, 56071, 8508, 74138, 11852, 28645, 68285	yes
746	23126, 61511, 3746, 52327, 8436, 71886, 40249, 68841, 65814, 32023, 67837, 58936, 35759, 69575, 33353, 10617, 23324, 73272, 39377, 17382, 72695, 53361, 60139, 19303, 71877, 3385, 15985, 57919, 73680, 62319, 51339, 50875, 31761, 68753, 35758, 56072, 57968, 12209	yes
747	6615, 40027, 10885, 38650, 62557, 62448, 32193, 13505, 18962, 14569, 33529, 52739, 66731, 56046, 53777, 6470, 28314, 16304, 62884, 43050, 11283, 24597, 13979, 12452, 3689, 12900, 53126, 41393, 74362, 67076, 69320, 57521, 46538, 1868, 13118, 33113, 39584	yes
748	63031, 44302, 23109, 6185, 12425, 5899, 34761, 16749, 23551, 2350, 33812, 30950, 50478, 31238, 68071, 53234, 19043, 64856, 6790, 16448, 42137, 58489, 38672, 63692, 42905, 22091, 33897, 54720, 43341, 34229, 60754, 60903, 33286, 28226, 32160	yes
749	41966, 13464, 22097, 19845, 68222, 23701, 64888, 47732, 3851, 32237, 4163, 31706, 6413, 65953, 49144, 64065, 63362, 34791, 35749, 68007, 71893, 69296, 39207, 10077, 63012, 10229, 3961, 5603, 15574, 55441, 63352, 72228, 12374, 36204, 68305, 57152, 9203, 17036	yes
750	80, 33451, 16645, 19834, 61024, 5834, 46946, 67744, 1138, 10856, 73627, 19983, 12810, 11591, 71326, 15662, 60569, 23527, 53317, 30337, 19202, 51051, 59960, 2642, 56906, 38618, 18376, 56696, 52101, 8448, 41246, 54378, 68515, 29503, 15186, 8225, 9342, 70801, 9652	yes
751	44821, 16821, 70618, 2690, 44717, 42592, 25427, 10678, 39401, 39987, 51733, 51169, 26614, 16088, 23835, 41409, 49877, 64961, 4287, 51888, 2330, 47443, 61788, 51708, 39234, 51126, 43476, 65467, 21244, 47759, 24351, 6637, 56528, 71770, 70360, 8693, 50868	yes
752	45273, 8229, 33223, 22992, 61872, 66906, 6580, 61008, 5053, 51754, 2727, 14087, 45566, 66216, 20960, 25788, 24900, 30556, 49251, 18777, 13917, 7892, 13841, 16102, 55966, 18730, 30964, 61060, 60536, 29348, 3985, 31659, 44105, 70308, 13344, 24568, 61355, 65727	yes
753	63446, 16921, 51641, 62187, 39703, 9045, 45213, 26031, 24684, 44791, 54130, 49587, 70421, 1108, 15837, 64508, 8245, 9789, 7179, 47774, 2673, 71807, 10927, 47276, 47503, 71568, 51739, 46626, 9629, 11766, 46830, 26971, 7187, 59100, 68756, 15423	yes
754	7483, 20742, 54045, 5505, 13215, 19932, 5849, 24945, 15356, 8781, 7511, 13420, 38825, 35082, 24151, 14991, 71212, 35343, 74013, 695, 39665, 28781, 62672, 19963, 39939, 62350, 70415, 24087, 71154, 46537, 63268, 32497, 6595, 48295, 17000, 53471, 51174, 29983, 40870	yes
755	872, 60633, 16314, 12182, 23060, 34566, 31363, 46940, 46136, 7491, 20841, 27891, 66808, 38205, 31420, 70898, 57881, 66400, 21181, 22679, 65163, 56065, 73881, 19539, 25171, 64073, 23194, 9009, 15962, 21573, 38595, 44315, 44474, 12115, 24313, 42150, 26682	yes
756	64221, 65322, 26168, 17262, 60572, 56074, 8703, 66922, 3373, 19010, 1416, 70751, 46679, 51134, 67490, 45415, 20926, 30250, 14071, 68193, 73218, 23352, 7713, 16813, 54861, 58614, 16361, 70348, 7549, 6302, 47102, 37273, 70626, 39877, 53795, 84	yes
757	37098, 9231, 40586, 56882, 10178, 46955, 25867, 5391, 71739, 30945, 6729, 18004, 24063, 29754, 45173, 2448, 41502, 31875, 11724, 37291, 44345, 18692, 31937, 70598, 37973, 26839, 69793, 20114, 25799, 10211, 69934, 48846, 31396, 45072, 27590, 34481, 69720, 35205, 31944	yes
758	5133, 40153, 22416, 3390, 1663, 49600, 37381, 60420, 18808, 1285, 71936, 27862, 38472, 25044, 20909, 69695, 16091, 62684, 28997, 55032, 65916, 4815, 55603, 37995, 36056, 62950, 42650, 67544, 30192, 73407, 49861, 68869, 44051, 19159, 11167, 19141, 3468, 24350, 27369, 43512	yes
759	64469, 21093, 11343, 57655, 14817, 34785, 73864, 65155, 66870, 7496, 32123, 30559, 56829, 28332, 27506, 29261, 14029, 8136, 24453, 9699, 36449, 28002, 58995, 66122, 36959, 68001, 68785, 12434, 4017, 22046, 70108, 53136, 61639, 67600, 56459, 3803, 381, 65750, 68551, 5347	yes
760	4242, 74603, 39893, 50943, 71775, 43927, 38929, 17391, 42237, 50728, 58878, 15834, 73567, 34042, 22727, 59516, 8017, 1316, 66866, 21080, 55031, 56125, 42200, 61808, 66047, 47937, 3772, 33107, 13700, 37871, 22279, 49110, 6531, 60415, 26215, 56634, 57719, 13551, 60956	yes
761	73562, 48818, 73231, 49733, 14179, 69952, 73140, 3503, 12951, 25556, 11789, 51505, 53448, 44583, 67367, 34132, 50774, 44552, 61242, 35478, 67053, 13641, 44776, 55599, 16587, 57131, 56164, 32274, 68855, 69940, 15934, 21207, 65950, 48743, 16039, 72413	yes
762	47548, 54912, 9027, 25262, 5387, 3038, 47873, 19703, 21962, 16841, 50705, 29180, 69808, 53119, 69366, 20685, 29396, 68754, 74112, 11998, 39740, 11226, 46569, 26164, 73268, 51552, 63800, 5778, 67684, 39521, 39894, 26751, 43380, 31048, 69501, 63844, 53553, 32584, 74438, 11162	yes
763	49274, 38810, 15038, 44310, 42686, 7538, 37405, 27248, 33194, 10061, 990, 25759, 8429, 4082, 47999, 51231, 69874, 48363, 74597, 20286, 3601, 48551, 61069, 60724, 54761, 57568, 5224, 16799, 6796, 74630, 56624, 14955, 15145, 42075, 14180, 63768, 13443	yes
764	55482, 34458, 36447, 45589, 34632, 8927, 17119, 65639, 47198, 61494, 7457, 68917, 73896, 70183, 67030, 15665, 19999, 56913, 58006, 38096, 59603, 66105, 27815, 8884, 57083, 46126, 70570, 70850, 15732, 1689, 12857, 47248, 49833, 56867, 39219, 55064, 14507	yes
765	24400, 64467, 33788, 17869, 25317, 59837, 17554, 72954, 9574, 11624, 9877, 21041, 8639, 44996, 53618, 36050, 59122, 34631, 61778, 59212, 51658, 46015, 72206, 63223, 27868, 55912, 47736, 3281, 3289, 6352, 11080, 42934, 29212, 69355, 9855, 7499, 40751, 45864, 71309	yes
766	4110, 55994, 68036, 18802, 51466, 50877, 62414, 2277, 52479, 48695, 23400, 15300, 8486, 41710, 7740, 39383, 58156, 29052, 71782, 48753, 53046, 1094, 56570, 18185, 21287, 67702, 56838, 32138, 18627, 66881, 23138, 19652, 22442, 52015, 63537	yes
767	39583, 25021, 62241, 24525, 18116, 38520, 60896, 31284, 19615, 24507, 74162, 23553, 14651, 40975, 44006, 33458, 48721, 40911, 17288, 52403, 51701, 35029, 13637, 73650, 66321, 57923, 32592, 5882, 45088, 61104, 24156, 47919, 30261, 3841, 59275, 69610, 69647, 18160, 48696	yes
768	6046, 31607, 30111, 45535, 73412, 47853, 71620, 19457, 20323, 45970, 7513, 45077, 74489, 14349, 13873, 44271, 11660, 31980, 71652, 48948, 25421, 40526, 53789, 33601, 9314, 37053, 50035, 56215, 71788, 30581, 9190, 68013, 17292, 252, 38894, 36665, 9007	yes
769	31056, 2455, 32060, 57369, 43895, 72075, 59328, 60676, 62963, 67015, 49310, 50791, 61726, 19425, 24487, 37473, 5819, 37998, 23741, 43821, 27732, 25967, 25017, 31337, 60149, 43012, 54313, 25511, 45411, 23981, 52634, 67513, 62017, 57785, 25546, 22393, 14237, 17473, 1533, 38407	yes
770	54057, 1070, 27770, 19928, 45334, 56152, 37463, 25782, 10259, 74628, 24164, 52040, 58694, 27658, 57041, 6092, 8275, 16941, 74539, 34351, 69589, 36258, 72089, 52505, 31360, 31378, 21971, 23713, 69803, 3079, 68066, 32285, 36637, 16929, 54351, 13866	yes
771	49321, 21298, 17785, 49639, 27068, 44488, 52229, 23547, 64658, 64101, 74149, 46668, 46808, 62849, 15099, 14815, 15864, 9388, 56430, 31825, 19832, 69177, 65080, 1785, 63066, 8712, 44070, 23499, 43269, 59324, 4595, 16398, 18490, 9529, 33981, 67429, 33589, 23617, 2403	yes
772	52372, 32090, 10479, 24971, 63246, 59578, 33129, 23765, 49991, 34348, 67378, 16815, 8734, 64234, 31124, 21350, 64617, 51928, 39986, 53892, 26124, 38837, 7806, 11938, 49765, 56201, 53512, 35358, 45239, 35663, 30996, 5511, 3042, 37775, 26272, 8672, 59913, 11163	yes
773	66474, 1098, 13764, 55613, 15363, 61773, 37825, 61660, 17329, 62168, 19031, 63152, 69959, 34486, 63324, 60431, 16771, 48592, 66498, 62372, 67049, 66861, 44903, 8077, 22703, 48341, 57076, 54938, 34247, 61055, 66619, 47466, 64786, 57133, 27252, 65742	yes
774	69383, 51031, 22916, 5724, 74460, 46873, 54856, 24700, 37719, 21862, 45804, 72067, 64992, 28220, 62397, 67002, 33271, 71376, 8928, 58270, 45228, 48381, 37274, 39899, 48503, 62257, 27244, 71918, 61645, 48522, 13015, 36746, 26258, 45615, 42046, 71235, 71195	yes
775	2230, 59620, 42915, 44615, 10263, 46366, 37880, 14514, 72269, 61361, 12274, 15323, 24102, 70010, 39147, 59193, 58587, 62051, 73749, 62654, 16327, 1032, 49117, 8973, 10370, 29972, 7842, 18369, 73455, 30081, 46938, 46548, 54886, 29622, 18952	yes
776	32338, 903, 1376, 64733, 11240, 56750, 65261, 56805, 53188, 67396, 42714, 48037, 12509, 2549, 69807, 32886, 63927, 64297, 46328, 31328, 4657, 68537, 28305, 9702, 21035, 2036, 48997, 37358, 62028, 51818, 31261, 38576, 55443, 3374, 16306, 62749, 25917, 9666, 64275	yes
777	38869, 43249, 66454, 2491, 67467, 43192, 59910, 50801, 17098, 6304, 36961, 65712, 26597, 3184, 8517, 58934, 4068, 38574, 5195, 4761, 7112, 69258, 12109, 54069, 38308, 48683, 41036, 63988, 68528, 29505, 14145, 50675, 52452, 41075, 46348, 26483, 24828	yes
778	25681, 40229, 51111, 22412, 39043, 63212, 31458, 683, 66491, 12017, 60609, 91, 67273, 23435, 29860, 324, 11371, 52151, 9128, 11741, 74322, 35664, 42031, 7867, 1402, 72300, 15407, 899, 61897, 11658, 25377, 67438, 35551, 52574, 9197, 53425, 51953, 54892	yes
779	18186, 32709, 70178, 65672, 38561, 62382, 6065, 63083, 29254, 16581, 28194, 61777, 32989, 8476, 73212, 30997, 12904, 47389, 19838, 6429, 38233, 64330, 63232, 15646, 26696, 72813, 18322, 23940, 66493, 6764, 46012, 22378, 12574, 54250, 52420, 72830, 56007, 65817	yes
780	15986, 39313, 59605, 7680, 70921, 40991, 17331, 17263, 70209, 12016, 62078, 60340, 5167, 20962, 12677, 63390, 1434, 74479, 30818, 51122, 56082, 73944, 20669, 13790, 23188, 19510, 38682, 46134, 5048, 60235, 36302, 55619, 35146, 55114, 11129, 47789, 11815	yes
781	20005, 27050, 12849, 20684, 56026, 35615, 30120, 37264, 6882, 34734, 60188, 25300, 65605, 30104, 7304, 63664, 47501, 69726, 42313, 50534, 39309, 2086, 58905, 62802, 20821, 391, 24966, 1165, 52925, 37651, 34398, 56119, 19184, 54491, 67426, 24202	yes
782	16558, 32414, 21315, 42895, 24462, 19898, 54568, 64013, 14024, 27879, 21939, 17841, 12991, 10903, 65265, 14152, 45893, 37758, 68335, 36396, 33322, 19057, 58904, 45252, 5773, 37458, 43938, 67797, 63206, 43760, 3757, 9136, 59112, 31118, 44114, 58119	yes
783	62193, 66125, 39772, 42677, 41383, 18805, 1750, 65076, 54256, 50955, 14913, 71406, 2907, 8550, 46587, 20879, 19771, 32893, 27957, 15629, 19806, 27800, 12439, 39536, 56183, 19271, 74513, 19131, 52781, 46805, 6605, 48271, 30786, 23075, 5357, 7413	yes
784	22532, 67274, 5480, 51844, 74247, 19676, 63765, 4887, 46312, 63899, 9693, 35386, 73778, 61997, 28941, 71244, 45468, 24889, 62943, 33527, 18958, 35587, 11623, 3729, 26423, 43510, 15201, 72374, 28037, 6818, 13755, 27453, 19508, 44569, 72637, 59036, 45065, 57752, 47647	yes
785	24933, 19096, 73947, 47801, 35196, 29039, 52633, 62150, 8738, 21367, 21349, 24720, 9918, 6487, 45355, 6787, 46397, 4266, 72644, 50090, 4897, 28414, 65587, 13833, 43608, 5425, 8584, 60714, 69845, 69182, 15378, 15412, 60039, 10204, 3822	yes
786	13660, 28312, 13284, 8049, 63454, 48303, 1280, 3824, 47744, 13839, 9038, 56100, 13656, 30649, 52352, 34628, 27356, 66876, 43001, 26995, 58305, 26815, 11697, 52444, 13236, 54798, 25761, 40891, 2569, 40745, 9958, 45661, 22455, 48396, 44395, 24379, 25692, 53127, 2762	yes
787	48594, 12674, 65352, 55836, 74529, 74145, 56141, 10039, 64944, 641, 63510, 44054, 3594, 43733, 18561, 69055, 24309, 71724, 4858, 15931, 8709, 21237, 49635, 70250, 71642, 70672, 24370, 31032, 27131, 8048, 65789, 54771, 26918, 66625, 26407, 36685, 49392, 12528, 30919	yes
788	63642, 9769, 72072, 6730, 43615, 44940, 27194, 71074, 60221, 71733, 13705, 36397, 27470, 48701, 34165, 46271, 8261, 43165, 55221, 68316, 16189, 54481, 25272, 58399, 45245, 41735, 18858, 42807, 21734, 11736, 17255, 51450, 58517, 33919, 53896	yes
789	62553, 73025, 10628, 66927, 32243, 71910, 30411, 13067, 36753, 4373, 43731, 45735, 13138, 44034, 55117, 71041, 5115, 15555, 63769, 61610, 4233, 28111, 35089, 42099, 58715, 50147, 70414, 32890, 71658, 47562, 34489, 14506, 10960, 46612, 66049, 96	yes
790	67238, 16439, 63695, 49993, 47112, 50978, 38356, 71822, 64471, 16726, 28473, 282, 2007, 5315, 5477, 16045, 5514, 67032, 49469, 53876, 21609, 7648, 16948, 43871, 55039, 13270, 34472, 2552, 57121, 68121, 43696, 71695, 64998, 28950, 22300	yes
791	61255, 41981, 40806, 15051, 29585, 33360, 24270, 46770, 6269, 41252, 37313, 17308, 44309, 10865, 18035, 17368, 24149, 66334, 68253, 31673, 26725, 45898, 42859, 20016, 46737, 25355, 41775, 17217, 28589, 27484, 55734, 23942, 8135, 46644, 26020, 42775, 71911, 16055	yes
792	56305, 17095, 66222, 72666, 33159, 32291, 11313, 35987, 20216, 6957, 20871, 54444, 28643, 36574, 12397, 21969, 7924, 35412, 54727, 28171, 12375, 28162, 60768, 43693, 40566, 46241, 67901, 4215, 51027, 38546, 9219, 14970, 34475, 67104, 1007, 29640, 69275, 3642	yes
793	873, 2427, 27211, 59896, 41546, 15332, 47658, 43807, 31302, 15764, 64459, 46123, 18538, 46403, 11680, 18122, 69399, 2256, 68837, 5642, 39935, 3368, 32794, 48453, 26973, 41096, 27370, 63363, 11859, 3853, 50270, 52480, 52612, 8627, 5322	yes
794	35912, 31087, 37659, 63457, 74298, 32167, 56340, 53314, 67805, 26273, 16626, 67203, 39505, 24609, 3054, 56710, 53809, 61490, 55709, 6209, 36079, 25373, 7658, 55655, 47091, 1444, 35448, 32970, 74034, 35121, 15057, 5346, 73937, 68972, 49938, 2131	yes
795	64794, 66767, 53684, 52405, 65046, 64702, 51820, 53182, 68540, 31873, 21563, 37713, 5472, 31372, 37910, 34243, 66133, 36743, 48273, 36811, 16666, 13084, 42037, 37247, 9356, 74463, 39832, 44587, 26385, 31866, 3790, 62008, 36629, 62312, 44139, 71900, 30241, 7272, 6959, 64560	yes
796	34533, 15397, 33887, 31173, 6338, 74223, 61563, 34648, 15284, 39065, 38039, 44342, 62779, 70438, 19591, 71162, 68774, 21504, 3226, 49239, 33503, 16708, 64646, 15367, 60973, 19755, 62827, 23542, 59271, 51160, 39776, 23452, 35507, 61312, 25862, 58596, 22669, 41693	yes
797	71087, 28403, 42875, 43703, 15712, 28662, 33541, 63140, 52945, 13522, 47051, 68502, 54273, 4037, 64392, 66087, 55179, 41427, 25215, 9634, 65958, 11364, 23473, 18492, 20225, 18923, 62011, 39835, 51372, 49697, 63912, 39092, 7614, 73438, 7917, 518, 30523, 68504, 22652	yes
798	47479, 35039, 61103, 20993, 59419, 25992, 72484, 37923, 32844, 71825, 73808, 28560, 58867, 73886, 57378, 7256, 74421, 21265, 55719, 33505, 22140, 21605, 37629, 71475, 44760, 16410, 18533, 63910, 65059, 42899, 40305, 27326, 15361, 53718, 4183, 31597, 58616, 59751, 66984, 6109	yes
799	50988, 25842, 3261, 9290, 14282, 56167, 12072, 47887, 60388, 31013, 74018, 35309, 13674, 5815, 74032, 63675, 11714, 1229, 52022, 62890, 9270, 69797, 30934, 15669, 47553, 36170, 8726, 23703, 3730, 52242, 59845, 54991, 17421, 69429, 1760, 20828, 41088	yes
800	44416, 70463, 902, 61099, 9492, 43618, 4688, 29080, 43203, 2486, 64986, 15398, 31533, 27331, 70099, 17625, 40406, 68333, 13466, 59641, 335, 52988, 67651, 48634, 55037, 13848, 42213, 65785, 4960, 68624, 49606, 61654, 73453, 35030, 46822	yes
801	6736, 57436, 18305, 7420, 17992, 52149, 55022, 44848, 40994, 64556, 72144, 3198, 41144, 10022, 31999, 53947, 13794, 56866, 70679, 68350, 40827, 53071, 26196, 62763, 28701, 31008, 20152, 35806, 11259, 5805, 63407, 43315, 42485, 6379, 73251, 63400	yes
802	45512, 10745, 3584, 2479, 22558, 68818, 4076, 18189, 43137, 58401, 20646, 10293, 37305, 73155, 64778, 820, 31167, 7153, 26449, 60233, 23615, 51012, 49761, 38809, 8944, 24132, 15080, 55758, 70263, 8783, 65969, 68835, 28337, 62878, 53940, 58345	yes
803	9665, 49255, 1967, 39111, 56035, 21191, 53213, 27828, 66845, 48151, 12988, 20938, 2966, 51117, 61670, 37604, 32294, 62864, 61054, 36630, 70431, 64841, 23115, 38708, 40221, 37253, 47016, 8251, 19376, 24022, 54004, 62132, 65596, 71146, 44875, 55398, 51436	yes
804	24606, 2161, 52334, 29383, 30288, 6443, 71072, 64027, 21095, 73855, 65977, 48493, 7628, 48044, 73513, 10701, 27779, 39597, 12312, 46044, 23462, 45016, 23046, 69607, 65286, 7238, 44224, 52016, 52429, 10217, 10725, 62506, 15808, 8471, 38471, 5544, 61059, 44004	yes
805	10632, 8279, 29316, 42430, 16980, 4752, 49370, 57245, 44927, 6933, 27060, 55542, 71042, 21887, 28089, 40776, 5275, 38204, 20013, 43074, 38702, 24906, 48264, 26926, 21180, 19040, 66875, 45645, 28269, 30862, 72985, 11427, 72037, 16046, 73183, 24583, 33967, 55419	yes
806	10209, 23153, 58030, 10181, 56840, 47863, 3882, 37684, 69294, 40965, 68084, 24118, 21864, 56530, 14330, 27165, 28125, 60644, 19825, 62947, 47048, 52545, 24303, 38573, 7520, 11003, 43620, 21531, 18594, 4293, 44834, 38073, 21839, 55883, 53341, 41850	yes
807	9881, 34205, 36833, 26040, 19602, 7007, 50959, 60308, 31877, 58020, 65668, 40729, 52969, 36681, 16683, 45146, 33645, 56711, 2222, 63680, 69742, 38259, 47055, 51204, 14867, 10850, 49052, 30532, 25037, 59597, 53054, 6411, 24831, 62623, 17358, 68432, 49595, 59461	yes
808	58572, 33121, 64638, 35639, 60554, 7807, 15212, 8235, 3831, 21472, 2629, 48513, 5075, 52583, 39386, 9245, 25728, 3807, 20342, 10056, 34147, 8995, 26069, 73307, 54345, 38102, 12336, 31151, 14869, 69246, 68199, 26316, 18693, 62275, 27383, 45551	yes
809	73854, 70494, 5975, 13984, 6934, 4524, 34156, 4701, 28087, 49331, 39490, 8157, 7919, 23582, 41723, 38469, 27668, 20485, 49142, 8090, 45776, 53272, 31896, 64850, 23386, 52931, 21252, 1043, 69732, 5962, 642, 37318, 47741, 19772, 63913	yes
810	2164, 47747, 39019, 22929, 9640, 40290, 69917, 66720, 14163, 63053, 7683, 33155, 10717, 58170, 6257, 41184, 21230, 24259, 24181, 57059, 15504, 47691, 6712, 54538, 67351, 30402, 41816, 3047, 33910, 38752, 25033, 31987, 44725, 63227, 5982, 6078, 59994, 46257, 47365	yes
811	64266, 61245, 16679, 50101, 64379, 73495, 28976, 66006, 2682, 51260, 53467, 47206, 35293, 58820, 15055, 59289, 62020, 19264, 12862, 44963, 71876, 49585, 48619, 60863, 3952, 59471, 44687, 37450, 72803, 11872, 37922, 61152, 20358, 24360, 62791, 73530, 59997, 45710, 30130, 51800	yes
812	4129, 67151, 64645, 15322, 42343, 23640, 42843, 61744, 65272, 11208, 4554, 62725, 50853, 13066, 29529, 20620, 6312, 27665, 58474, 34357, 55197, 40912, 54842, 35605, 48474, 20375, 50300, 188, 37081, 67313, 7869, 66592, 48330, 7360, 8210, 30449, 52951, 47930, 56222	yes
813	47484, 57272, 35669, 30703, 42261, 22381, 27111, 57925, 39636, 38488, 10501, 65774, 48675, 38589, 32381, 21590, 16358, 39249, 52908, 5538, 51255, 20807, 51783, 35498, 67625, 56232, 20571, 28122, 46624, 28052, 71745, 52609, 4985, 22850, 40330, 57689, 43550	yes
814	64960, 69872, 51316, 72946, 9090, 56478, 17084, 15250, 26283, 40265, 48407, 25205, 11823, 48206, 16936, 8399, 25927, 59363, 7117, 10791, 64247, 53438, 8512, 31780, 43781, 25497, 53318, 72925, 62649, 37855, 47488, 38256, 23009, 46735, 60249, 40103, 51547, 47734	yes
815	15979, 53252, 12745, 36555, 72175, 5633, 58221, 9953, 70009, 6227, 34841, 48265, 50280, 47372, 19707, 29603, 32751, 13519, 7367, 72376, 42319, 71771, 35296, 341, 66536, 6536, 11975, 7507, 43435, 64584, 21127, 28187, 69577, 50693, 33708, 13759, 17219, 57411	yes
816	62604, 5446, 48640, 33902, 8659, 386, 26892, 56297, 56990, 70191, 22763, 1409, 61990, 31791, 67391, 50852, 58068, 29145, 4072, 17937, 7783, 37211, 46850, 50120, 27204, 40877, 11628, 61470, 1479, 66175, 46615, 12767, 7172, 36070, 44872, 60409, 4003	yes
817	63532, 53376, 22255, 19372, 74388, 43345, 26200, 51975, 49696, 74207, 6540, 12367, 66839, 57895, 13768, 63818, 72864, 2400, 51136, 45469, 62188, 72560, 59901, 12009, 29273, 12262, 73522, 9546, 69444, 33490, 6517, 65043, 15948, 3688, 73671, 23660, 39486, 63956, 71336	yes
818	16794, 71844, 29440, 64155, 58022, 72801, 5350, 30970, 5526, 25573, 72043, 42467, 43976, 24235, 16353, 52590, 25948, 60273, 44301, 57819, 68628, 50312, 14635, 5317, 50036, 72512, 34814, 65543, 34261, 73840, 4066, 9512, 32047, 54390, 22066, 47547, 31520, 13548	yes
819	13540, 23200, 18964, 65541, 7318, 32342, 17003, 48738, 58793, 9973, 45435, 12719, 4577, 70558, 70816, 50870, 7993, 25614, 19253, 36381, 7185, 32833, 37144, 43347, 32674, 3510, 2172, 4711, 11810, 31370, 51192, 20775, 30953, 74341, 30571, 9808, 18524	yes
820	4517, 73670, 35852, 69877, 1441, 28165, 57957, 54439, 54212, 46722, 11971, 73120, 74132, 51162, 62057, 62914, 2251, 70568, 36240, 60380, 2263, 55229, 28596, 909, 74454, 27667, 47531, 14747, 18611, 67215, 17991, 61464, 1490, 6492, 44661, 25660, 9867, 32789	yes
821	71853, 18840, 45860, 27558, 52053, 57089, 6226, 74109, 18003, 49917, 6557, 41168, 42496, 52161, 51762, 48886, 31777, 69224, 6681, 12735, 46496, 46255, 64677, 6107, 15383, 10344, 13373, 36248, 44597, 71984, 11392, 28573, 49937, 16998, 72950, 60413, 4719	yes
822	67996, 22890, 17508, 38893, 54111, 48129, 51191, 1810, 59542, 17106, 33869, 56488, 2471, 15243, 62876, 56697, 73338, 51631, 52934, 13631, 28212, 35372, 43108, 6232, 71662, 31528, 16757, 4349, 15991, 19061, 67509, 58097, 49511, 60199, 52790, 58046, 55083	yes
823	42413, 416, 29766, 45592, 22116, 49061, 67992, 55459, 28752, 68552, 73044, 52627, 51599, 14033, 56489, 54770, 30194, 32130, 41977, 45905, 14128, 28483, 39527, 14583, 23342, 242, 33857, 39372, 61151, 35844, 43785, 44544, 28193, 61942, 42576, 43482	yes
824	70728, 16932, 54670, 13568, 58376, 74475, 10224, 61394, 70021, 141, 68057, 6368, 3162, 49396, 23381, 2575, 7332, 49411, 27721, 65553, 49075, 65432, 18916, 71933, 73318, 21842, 19776, 14652, 56378, 25595, 13216, 8089, 31359, 7973, 51555, 30991	yes
825	66103, 55424, 8685, 51241, 57330, 22395, 21790, 52457, 39850, 18377, 32306, 50862, 32260, 1693, 22586, 15637, 54645, 40887, 44885, 2346, 11272, 2708, 16261, 66444, 65590, 64673, 19018, 71316, 24501, 69345, 65222, 4100, 65254, 63669, 12281, 6918	yes
826	64365, 39403, 429, 48656, 51475, 11792, 71518, 12041, 20693, 2619, 45183, 54192, 68507, 11219, 50376, 24046, 51080, 47949, 12984, 3638, 15691, 13813, 27728, 47047, 66324, 52571, 24304, 35193, 37168, 5054, 35847, 74591, 30709, 21664, 74240, 12306	yes
827	39164, 17546, 4888, 54074, 63802, 1804, 73379, 32767, 19968, 49231, 7307, 69228, 27863, 47452, 56692, 28014, 27228, 36659, 7814, 35711, 69236, 49558, 49222, 12294, 35410, 44357, 46364, 11803, 54270, 42931, 12914, 28290, 38982, 59460, 18285, 44800, 60741, 70795, 46621	yes
828	45126, 56001, 73271, 60579, 14660, 35354, 64859, 47358, 26209, 28826, 54226, 33833, 33737, 69490, 68358, 66624, 14476, 21663, 41635, 27788, 9432, 1777, 61863, 39880, 72166, 12834, 16009, 3475, 64893, 65692, 37498, 33616, 15812, 72719, 70737, 58342, 26081, 49643	yes
829	41040, 39006, 55951, 34277, 22195, 10847, 2297, 26787, 38324, 60951, 21250, 17218, 64198, 57781, 19619, 61866, 33089, 28289, 67373, 71491, 49743, 49927, 55165, 28390, 68233, 19479, 35672, 11607, 47678, 48305, 46105, 27791, 9470, 11177, 31067, 16110, 19487, 32465, 32793, 64124	yes
830	25467, 33900, 46021, 11826, 37661, 54473, 56206, 32045, 68579, 11935, 29225, 9752, 5566, 41124, 16176, 58210, 22472, 15749, 30807, 16252, 68649, 44026, 72729, 62044, 63105, 50854, 2633, 72165, 21721, 53326, 39431, 28412, 47806, 10676, 26288, 17147, 61686, 41887	yes
831	31275, 14011, 8863, 15659, 60968, 15224, 5867, 30647, 46551, 10961, 55121, 37830, 36226, 64660, 46654, 8708, 15475, 8242, 65161, 25621, 61521, 26235, 68635, 28993, 4413, 4415, 20813, 33010, 35133, 18106, 35486, 47833, 4430, 60288, 27311, 4117, 31651, 53657, 25856, 58563	yes
832	4528, 17666, 57054, 57230, 62820, 15430, 36025, 15488, 410, 35179, 3286, 7618, 39735, 26391, 40094, 47025, 37555, 53460, 5177, 66801, 74483, 18672, 57386, 63397, 46948, 67350, 71354, 1427, 1791, 59118, 20331, 1799, 24749, 62401, 72280, 69540, 46050, 51995	yes
833	23273, 18806, 60713, 49141, 55438, 63521, 9810, 65779, 40019, 25349, 33180, 28015, 58324, 66863, 23020, 44869, 39936, 74190, 15725, 71681, 64958, 10141, 1814, 61113, 48490, 39374, 13731, 20773, 40652, 5184, 63842, 37590, 44082, 52044, 54985, 67099, 33134, 27836, 20997, 15910	yes
834	8687, 30389, 12050, 60013, 64603, 36200, 65447, 46613, 22509, 397, 36424, 15779, 26157, 41830, 59619, 63104, 1566, 55226, 27705, 57613, 10250, 72066, 12923, 55355, 36329, 56583, 25876, 62430, 22617, 59283, 48636, 15514, 72382, 29702, 25249, 23903, 15921	yes
835	43932, 56671, 59335, 44976, 18502, 27510, 14299, 42885, 10086, 57478, 71107, 46468, 48039, 20671, 34855, 24159, 11413, 47075, 68892, 44312, 47688, 63714, 2023, 35298, 16089, 33816, 26866, 17180, 38034, 8704, 12286, 18041, 52626, 18154, 30641, 20327, 20922, 37698	yes
836	63791, 41175, 5902, 59472, 1603, 40147, 74245, 57753, 22035, 19637, 63539, 63497, 10435, 5404, 28298, 34611, 812, 35858, 49716, 47326, 68089, 12736, 7789, 40981, 37712, 20845, 64788, 14468, 672, 62695, 62329, 30408, 47367, 27587, 64516, 30137, 2331	yes
837	48136, 8601, 73238, 49442, 71798, 25471, 6917, 15350, 38479, 61659, 35925, 58029, 67127, 72854, 72911, 63084, 63265, 69326, 7567, 16971, 14904, 67525, 64479, 42516, 28388, 64412, 51525, 73951, 29064, 32289, 46835, 63207, 7445, 26583, 38307, 3512, 11238	yes
838	28350, 3725, 6824, 32881, 15886, 49719, 44088, 31521, 18196, 15658, 68393, 15767, 25578, 14190, 32979, 73389, 46440, 59766, 5212, 48172, 61129, 44130, 14324, 62831, 7928, 23961, 70868, 22966, 28578, 33192, 17133, 30987, 51088, 44047, 31105, 5714, 67719	yes
839	23766, 33994, 53063, 49155, 26913, 36148, 25110, 40637, 33443, 52130, 22357, 20346, 47127, 35338, 13890, 519, 27812, 64127, 51476, 2236, 16049, 31050, 17272, 4848, 46696, 74366, 62683, 30999, 17712, 34505, 12503, 38252, 32026, 41681, 47676, 11360, 57643, 29126	yes
840	13432, 73890, 68862, 28555, 21990, 43631, 10520, 35977, 64515, 63020, 74099, 40509, 21201, 3093, 31581, 63090, 18927, 68257, 62688, 31251, 69034, 65818, 36689, 36227, 40010, 14463, 67501, 3085, 35182, 16546, 74, 37399, 23276, 17144, 7745, 57906	yes
841	6022, 769, 38119, 24990, 28288, 184, 48504, 8437, 53102, 3733, 29749, 54123, 69880, 65266, 61830, 71496, 16482, 8541, 73007, 32076, 31129, 40050, 65413, 16697, 31401, 71694, 40972, 21363, 61717, 71108, 73192, 61218, 55396, 11918, 48850, 14095, 62837, 24718, 47721	yes
842	69669, 58668, 34696, 16935, 24858, 9624, 21213, 65734, 47218, 51730, 72825, 4646, 21366, 40949, 34157, 1911, 27129, 50991, 65759, 21489, 28400, 45609, 72205, 51688, 55816, 50287, 56091, 3254, 70529, 32380, 65355, 10877, 10322, 48065, 41822, 49431, 51449, 249	yes
843	45634, 10964, 407, 18545, 57062, 39160, 69844, 26388, 24155, 41992, 1627, 44220, 52520, 25177, 8880, 68263, 40327, 55028, 61423, 32284, 4048, 63872, 68596, 27503, 62803, 52791, 11125, 70147, 63317, 53030, 58831, 8336, 11781, 61870, 67757, 17100, 24269	yes
844	72726, 48196, 3946, 65242, 527, 14088, 54414, 23904, 24840, 15634, 70154, 64181, 53181, 2064, 56254, 8032, 60853, 5211, 10421, 826, 9328, 43040, 29119, 31421, 15394, 61750, 71113, 14447, 21760, 55845, 28458, 61911, 39652, 19851, 13885, 22191, 1068	yes
845	43777, 23207, 65356, 30988, 20302, 2154, 18973, 50565, 72387, 64214, 12402, 1899, 47315, 53342, 51378, 37369, 45765, 24918, 37427, 3587, 31770, 45522, 51697, 22436, 13314, 17471, 10236, 61480, 54941, 37287, 29675, 52829, 28224, 23423, 40820, 12831, 16168, 49933	yes
846	58938, 33494, 73465, 42941, 25746, 29460, 54119, 12870, 74222, 29345, 73204, 37620, 54333, 32072, 52773, 31848, 70708, 52323, 52035, 66818, 51295, 23437, 68779, 22434, 743, 39453, 35251, 57248, 68680, 51155, 20383, 58275, 31579, 30594, 7925	yes
847	7718, 9375, 9554, 34212, 36735, 24369, 9609, 4401, 25847, 54947, 44097, 32500, 8241, 44260, 11469, 32474, 74037, 55413, 4700, 7428, 12633, 67750, 34676, 18156, 64979, 45574, 56552, 19874, 70888, 47447, 4527, 54108, 35949, 46867, 41846, 60454, 74296, 60468, 37877	yes
848	6122, 16985, 26658, 29683, 51379, 53782, 33231, 49784, 40382, 41098, 35114, 18750, 17796, 8957, 7667, 52694, 7229, 62496, 1421, 22221, 39278, 39724, 60865, 52198, 47221, 28738, 70319, 26679, 55160, 34575, 68242, 72391, 72123, 62219, 18570, 70418, 70222, 32986, 8741, 9637	yes
849	51161, 3723, 69629, 48956, 2283, 65502, 17220, 72810, 49028, 63250, 28115, 52127, 49312, 71351, 4770, 59575, 30094, 8948, 19475, 11379, 72730, 67903, 56247, 20846, 27235, 20965, 17475, 55612, 42967, 28524, 48471, 21619, 9849, 8883, 13400, 14350, 5153, 43211, 66146	yes
850	38385, 57357, 3937, 38020, 73067, 14266, 42174, 25173, 55876, 51244, 50492, 19627, 24509, 17258, 41801, 67034, 13946, 27974, 31015, 8362, 61933, 11510, 57180, 52994, 60703, 68625, 32930, 41713, 21602, 53110, 46237, 73823, 49091, 59119, 46256, 20105, 30580	yes
851	31333, 44049, 53366, 61712, 26677, 4193, 72993, 17780, 18801, 39296, 28429, 11218, 54843, 31083, 63453, 72301, 35201, 17710, 30135, 14078, 1266, 20937, 71762, 69783, 54046, 39982, 47279, 69231, 40743, 70161, 74656, 17613, 67987, 14329, 44002, 25598, 45021, 19717, 66847	yes
852	27720, 40866, 52062, 22296, 67460, 47260, 56547, 10930, 74115, 28820, 65695, 36423, 43545, 37483, 57737, 46700, 73176, 16081, 55132, 24031, 21135, 26865, 33989, 9964, 60525, 15291, 15720, 36841, 9424, 4422, 47036, 63435, 22749, 3550, 50910, 45872	yes
853	40007, 61417, 25504, 22846, 11319, 58339, 65274, 54964, 62910, 10655, 69820, 4313, 59892, 38705, 1775, 49834, 71657, 53964, 6239, 14986, 13013, 59622, 40892, 55371, 53584, 39612, 41766, 57061, 27232, 14043, 18718, 73783, 63292, 24468, 72427, 5022	yes
854	18828, 43858, 4825, 72791, 41083, 49759, 45346, 59096, 37131, 3578, 14385, 30896, 10203, 36207, 45472, 46067, 45023, 27826, 69886, 50609, 56424, 3554, 31149, 68888, 38491, 38157, 54697, 74048, 55595, 25024, 14483, 41636, 44206, 17938, 61756, 41843	yes
855	73288, 3342, 14535, 17148, 26983, 73068, 7264, 6434, 13399, 44005, 7935, 40418, 69103, 35285, 65974, 52793, 28822, 55726, 17861, 9868, 48488, 2271, 55653, 15304, 42302, 25126, 38565, 25250, 55408, 25937, 53125, 23606, 38896, 15848, 68179	yes
856	6217, 11192, 2351, 39150, 31625, 13658, 57338, 40516, 16282, 41793, 25071, 73921, 72268, 67693, 68208, 27289, 16990, 54339, 41431, 1361, 58816, 21221, 64250, 44326, 32217, 52430, 59546, 64340, 74318, 59099, 65844, 16335, 15140, 25955, 48588, 36192, 23593	yes
857	43038, 25787, 32012, 40755, 9052, 56852, 11662, 27038, 41623, 42006, 25824, 33915, 64369, 16561, 70302, 51298, 14178, 19309, 3044, 25129, 46311, 26389, 24364, 1944, 41030, 62201, 64973, 61409, 24687, 37267, 27580, 33580, 69418, 28004, 10387, 66199, 58288, 24437, 5255	yes
858	65279, 58559, 60584, 16925, 58876, 70145, 68188, 7204, 15382, 64274, 7340, 29738, 10684, 66012, 18646, 30773, 14097, 56425, 1573, 63087, 31215, 31038, 40608, 51118, 40479, 46785, 60353, 33225, 42327, 12934, 73133, 64790, 21465, 41272, 20471, 17250, 55885	yes
859	1080, 804, 33301, 61574, 58851, 57358, 29370, 33024, 42649, 46069, 40426, 331, 32762, 72558, 59094, 31545, 37884, 54475, 37384, 38584, 44778, 72417, 61030, 59018, 47859, 44173, 7503, 19906, 7371, 40274, 7575, 33206, 19616, 10386, 62040	yes
860	62913, 29616, 63880, 70541, 62030, 65795, 54443, 63132, 62747, 8236, 7809, 43565, 57163, 63922, 49804, 67568, 69484, 68671, 12995, 71156, 68792, 43334, 70592, 5908, 68230, 316, 28574, 46258, 53722, 4594, 21720, 5268, 12366, 19013, 14961	yes
861	55675, 44145, 47001, 51740, 49245, 56845, 59482, 24376, 64090, 43619, 8651, 28860, 31916, 36115, 21496, 41008, 24079, 41916, 48214, 72865, 20586, 29745, 23305, 50535, 47418, 2544, 64295, 74555, 43167, 15179, 63854, 54558, 25413, 70365, 59720	yes
862	61382, 15163, 55670, 18414, 64845, 26561, 73481, 38545, 69201, 28680, 61516, 74411, 53820, 54549, 69895, 58740, 40617, 27226, 5758, 67999, 29298, 35175, 21081, 59853, 21426, 19731, 63682, 51281, 63878, 68073, 14359, 42401, 30966, 17472, 63879, 10301, 46710, 18946	yes
863	50686, 61928, 42902, 13956, 47169, 23311, 20819, 33004, 74141, 19664, 46079, 27217, 47287, 71447, 14841, 22235, 58855, 55236, 17628, 19482, 11485, 17146, 32620, 58719, 65886, 22057, 56754, 68485, 3892, 61283, 26958, 49249, 63256, 5443, 52783, 15653, 55788	yes
864	4172, 73159, 22199, 1515, 26256, 71334, 9495, 65170, 2325, 49814, 72879, 65832, 29196, 73299, 35532, 35940, 14544, 27517, 21393, 56415, 32233, 19215, 33487, 25602, 53622, 23784, 48079, 41136, 47655, 27486, 9610, 39866, 2294, 52412, 51828, 4447, 47139, 14931	yes
865	62088, 17541, 67339, 55864, 7151, 13638, 38137, 53542, 8749, 21642, 65100, 51093, 9099, 27945, 25763, 36715, 31677, 58297, 8524, 52715, 43934, 20113, 54526, 17430, 47970, 73569, 26219, 15079, 11688, 9326, 51983, 27187, 35505, 13751, 1096	yes
866	352, 17833, 18854, 34674, 11172, 41378, 50522, 23427, 24326, 577, 51875, 56326, 43270, 27419, 55773, 19654, 62548, 61630, 26744, 33287, 16224, 16622, 47106, 18434, 65939, 3095, 63431, 23957, 5402, 51758, 59745, 31195, 7421, 29359, 21932, 10202, 72945, 57672, 38517	yes
867	17943, 26234, 24723, 21668, 57986, 33664, 47371, 24701, 14551, 37357, 30533, 14509, 17092, 50831, 50490, 62522, 70490, 58848, 71394, 14173, 38490, 59242, 30674, 55444, 60162, 63753, 53410, 2529, 67114, 22814, 35540, 21355, 68931, 73774, 49471, 5954, 46293, 74424, 49679, 31750	yes
868	19299, 10576, 8398, 37122, 34876, 19668, 49943, 53703, 56079, 569, 15891, 48272, 63026, 51389, 59401, 56416, 70296, 63202, 41988, 21686, 29823, 37037, 23938, 69282, 74617, 26890, 54755, 1792, 68180, 39152, 64055, 39240, 3391, 21975, 58287, 9055, 40302, 71001	yes
869	15264, 26845, 8964, 7419, 72789, 58663, 54998, 34006, 59327, 10849, 69545, 32353, 65607, 36830, 3312, 65038, 57597, 3039, 38973, 39910, 7999, 15936, 9788, 23414, 20718, 62205, 2620, 70987, 72750, 7280, 45908, 12678, 73684, 47808, 28904	yes
870	15953, 29481, 29452, 55790, 73275, 51125, 18769, 56421, 40440, 12132, 53670, 49870, 10474, 41771, 4089, 12712, 50620, 25637, 29791, 28770, 8879, 31327, 70192, 32390, 66362, 46574, 70162, 57475, 15829, 72616, 3046, 18822, 30330, 45622, 68808, 72196	yes
871	17757, 11140, 6480, 31326, 20686, 36627, 8857, 42162, 55016, 59020, 18784, 9086, 698, 15189, 17062, 13119, 52163, 67998, 62816, 64405, 28438, 23067, 37757, 44993, 66130, 701, 2829, 28279, 43390, 68509, 7558, 66484, 58825, 19974, 25826	yes
872	12297, 25941, 48162, 45940, 34692, 1375, 34519, 71024, 4378, 57927, 68519, 33714, 71130, 58870, 64626, 74661, 62230, 56510, 21585, 35890, 45153, 48388, 14585, 37026, 56099, 22539, 60309, 25859, 33836, 48012, 52903, 51690, 11046, 40878, 47227, 51233	yes
873	33912, 59195, 38180, 3657, 64606, 50936, 21984, 62459, 21406, 15073, 53755, 965, 10625, 70766, 28802, 59753, 4959, 58353, 8452, 72883, 29574, 37948, 72489, 7561, 63524, 38286, 29094, 56994, 58423, 4606, 46385, 33668, 10196, 62970, 49665, 73349	yes
874	41045, 4551, 74415, 32148, 19266, 45288, 2846, 31704, 18173, 12356, 24000, 54860, 25899, 15414, 21372, 5405, 23714, 40966, 12744, 43427, 14426, 63929, 8614, 54992, 30371, 16175, 54325, 37366, 36156, 11478, 22758, 67833, 15314, 34955, 66151, 32424, 58341, 32087	yes
875	1084, 56117, 12203, 3779, 37008, 40420, 62002, 6152, 14949, 42001, 48684, 48633, 56776, 890, 60271, 18687, 52936, 19977, 2156, 60669, 43256, 52068, 66489, 23103, 42010, 5030, 27297, 35535, 15989, 52512, 36007, 37089, 1995, 73709, 8502, 73327, 15521, 55944, 14713	yes
876	36626, 28851, 35342, 53021, 28029, 14060, 31168, 64447, 48861, 57220, 65792, 1117, 47677, 43465, 18157, 63011, 25815, 34052, 49131, 52261, 39743, 33496, 53852, 53073, 44380, 24733, 22841, 33162, 41056, 47158, 226, 37170, 71134, 53112, 59889, 65113, 62173	yes
877	2711, 54674, 32663, 72967, 39035, 55130, 11383, 920, 62108, 1227, 47023, 37685, 64039, 73049, 63506, 27533, 24276, 57166, 14191, 61977, 70881, 61628, 59262, 29497, 10125, 7022, 60438, 29737, 60246, 36236, 5536, 844, 62559, 11895, 15083	yes
878	73461, 56332, 74359, 18070, 29776, 45612, 25679, 18140, 2689, 35329, 3630, 74505, 65420, 49300, 15946, 72148, 9345, 11875, 53418, 26638, 3907, 22563, 67969, 63697, 57946, 103, 30937, 8556, 54969, 8104, 558, 51692, 64876, 35207, 9280, 5712, 68733	yes
879	24554, 35318, 24162, 29487, 44265, 69918, 46877, 22025, 56005, 68412, 65924, 6585, 51878, 49882, 34941, 13033, 68912, 73395, 36543, 68385, 55362, 45392, 48676, 26315, 65830, 73415, 38779, 14443, 69690, 65283, 69846, 34565, 9472, 25638, 67165	yes
880	9805, 33889, 67176, 42116, 72145, 66828, 52370, 7553, 5382, 45595, 27463, 23917, 32061, 42618, 41401, 63098, 37275, 36390, 37987, 61974, 3910, 68532, 61345, 48377, 13056, 20367, 51661, 30434, 36284, 58504, 39719, 10913, 14054, 69684, 42932, 30484, 4540, 36228, 64502, 11170	yes
881	64373, 66411, 8788, 14559, 59179, 18242, 23353, 16872, 11751, 624, 27346, 5065, 23690, 11996, 45505, 52234, 22789, 68985, 52789, 11947, 28296, 47762, 14710, 50041, 40953, 8248, 9018, 6428, 61369, 9363, 8743, 11995, 46240, 66821, 8073, 4633, 1646, 54423	yes
882	20245, 43861, 52713, 1022, 21004, 73595, 66070, 5583, 71796, 62158, 43132, 6600, 45339, 30968, 28760, 57885, 35074, 31561, 14877, 1710, 1133, 53724, 5003, 69428, 24172, 60239, 57020, 6360, 61259, 48071, 5534, 11126, 18018, 27491, 69473, 13410, 21431, 30506	yes
883	42288, 11264, 41372, 31952, 31968, 46010, 49601, 49409, 49459, 45227, 54901, 51188, 10916, 43175, 61503, 40780, 62504, 17496, 37061, 27040, 22464, 28245, 54366, 51037, 27108, 25673, 30879, 68275, 41438, 54175, 14661, 25204, 68317, 54623, 71469, 40422, 31615, 47809, 41658, 52759	yes
884	24378, 45393, 32654, 62745, 27128, 20053, 11769, 72219, 72294, 58880, 43128, 10318, 49318, 62314, 18575, 21167, 24821, 63796, 25789, 43359, 29436, 63949, 34793, 61625, 33899, 9022, 10470, 1720, 32829, 22015, 36590, 19024, 54170, 30087, 41010, 66932, 56504, 23123	yes
885	27230, 43066, 62902, 41213, 73196, 2312, 16977, 57777, 8595, 58913, 40996, 56238, 11570, 26436, 48417, 21034, 63078, 10634, 51041, 46059, 4608, 34776, 50293, 56799, 37920, 29477, 27082, 12848, 62994, 15009, 61591, 43221, 73763, 2111, 67499, 52009, 12631	yes
886	58769, 4393, 52358, 16352, 45188, 72137, 32154, 25099, 11964, 43643, 11393, 16995, 37715, 33, 26023, 24333, 1589, 60906, 41776, 70036, 54133, 5454, 14396, 55423, 72107, 45404, 17594, 54154, 50644, 37115, 38369, 12173, 72952, 56874, 14378, 18320, 61026	yes
887	21116, 4394, 74609, 73524, 47226, 23914, 14169, 24402, 11997, 27397, 72790, 52962, 32643, 12855, 45713, 18010, 52508, 54083, 58185, 32033, 30030, 12888, 42061, 44530, 41266, 18590, 52777, 50695, 11460, 10143, 60836, 45820, 67990, 22956, 72416, 43391, 4042, 62260, 59412, 57909	yes
888	68140, 56003, 30355, 17209, 5797, 11232, 43869, 59400, 16481, 43193, 66825, 71672, 8769, 28893, 20406, 45427, 21852, 53408, 73085, 3916, 56113, 41426, 51829, 31264, 24386, 15743, 11310, 28690, 29410, 16838, 19417, 2407, 39051, 3020, 2464, 56293, 74446, 44194	yes
889	35763, 23456, 2608, 45943, 57032, 35472, 43908, 71679, 38608, 61526, 8969, 31114, 41802, 30732, 11334, 72454, 28011, 6920, 32765, 46313, 51333, 41737, 17305, 21248, 8551, 42538, 26921, 39823, 35743, 63147, 25888, 17695, 1892, 42017, 6583	yes
890	25253, 53334, 20540, 59139, 71668, 16171, 43413, 23318, 61378, 17931, 42183, 64653, 33184, 14976, 64435, 8244, 30582, 24567, 25227, 886, 36873, 25494, 18403, 27771, 18183, 5515, 52267, 55184, 54079, 42571, 48660, 62847, 74211, 9917, 44714, 25555, 66532, 40056, 67068, 38272	yes
891	44659, 26755, 31469, 45266, 41641, 11311, 58130, 61316, 44270, 35452, 56752, 36748, 43667, 28091, 26621, 22024, 199, 65923, 13141, 5680, 30552, 23003, 70103, 28238, 56246, 55777, 21073, 28659, 47889, 34597, 42872, 47262, 33161, 16260, 24405	yes
892	59787, 10828, 53613, 52716, 73985, 39889, 4521, 21596, 35789, 56089, 4370, 35533, 19930, 73153, 42519, 69641, 52679, 35872, 13405, 36303, 66486, 16582, 56733, 42722, 46900, 18489, 49876, 60740, 48060, 16035, 66281, 73427, 36197, 26036, 19293, 25854, 49487	yes
893	27889, 34796, 29600, 55252, 36836, 209, 13204, 45766, 74358, 662, 64015, 4773, 16965, 68202, 48859, 21985, 27571, 23594, 72492, 12830, 65697, 65945, 19067, 14375, 56396, 23295, 38207, 48970, 69999, 36838, 65300, 10497, 6415, 54701, 15130, 15450, 37175, 38117, 6644, 25910	yes
894	64100, 27371, 8729, 309, 35231, 4184, 49777, 44456, 5118, 27278, 13185, 25748, 26417, 51691, 61405, 24681, 11462, 1318, 49005, 62996, 67291, 34498, 150, 1343, 22761, 2450, 21447, 27455, 49400, 29493, 21811, 60253, 61486, 43915, 23636	yes
895	21821, 17952, 48165, 8642, 27574, 4566, 37244, 55243, 60931, 18163, 44455, 31332, 63881, 54802, 39136, 19044, 14234, 17136, 39276, 38083, 31463, 13508, 11671, 3379, 47654, 69123, 4981, 45249, 3403, 58054, 35109, 30729, 57255, 54290, 2246, 5083, 14683, 27089, 28375, 21437	yes
896	169, 29637, 44667, 24413, 53198, 10028, 10495, 71763, 68420, 20011, 45938, 46509, 27778, 40109, 46150, 61845, 35638, 28440, 71027, 23303, 24474, 35266, 42523, 34223, 2772, 40446, 23163, 53141, 57865, 32056, 29235, 74662, 74332, 27035, 16305, 7971, 59887, 10976	yes
897	26765, 31595, 22422, 65060, 1524, 8202, 61946, 70919, 61187, 32978, 48270, 36799, 32932, 22096, 65757, 41912, 3071, 30108, 19388, 60389, 404, 66280, 56123, 65870, 40585, 14052, 45889, 52631, 59146, 9543, 7851, 35954, 21679, 7246, 19751, 27392, 20382, 4323	yes
898	63269, 68310, 61551, 68830, 7854, 70346, 19363, 46013, 6300, 29399, 49236, 6664, 43124, 67920, 41638, 37944, 45389, 21024, 17963, 47144, 14803, 54461, 63391, 30025, 19629, 6814, 30144, 48420, 71850, 21305, 48642, 59180, 73312, 70030, 37082, 66517	yes
899	7398, 70056, 73897, 48230, 60618, 11933, 32098, 38950, 29113, 2952, 19859, 16573, 33385, 37104, 49044, 38249, 61867, 57636, 13439, 32172, 23750, 57984, 57474, 30767, 70837, 23170, 5755, 25653, 39496, 36375, 71869, 54984, 10748, 27963, 54215	yes
900	17363, 24154, 54890, 73943, 19515, 67569, 69382, 6948, 68997, 36463, 34392, 23857, 71901, 17742, 60272, 58832, 66258, 25834, 41700, 34786, 17745, 47291, 31441, 43035, 28357, 12098, 63061, 5972, 25135, 18169, 73466, 57763, 6727, 51837, 48599, 74256	yes
901	69655, 46014, 43085, 56514, 66748, 28478, 53673, 25620, 29135, 62421, 54315, 11292, 66180, 8194, 63442, 8155, 56954, 12095, 63721, 13049, 41888, 6316, 11456, 22179, 20980, 70575, 35961, 8044, 25521, 60101, 62034, 18922, 72924, 52221, 39077, 38814, 61391, 25545, 73369, 56317	yes
902	58881, 68764, 20661, 44825, 54680, 34976, 4843, 19109, 48835, 30512, 44059, 71773, 60894, 64103, 11480, 5329, 61652, 25005, 23413, 33952, 32337, 69824, 65209, 45278, 50170, 34285, 57514, 66482, 29336, 12696, 73000, 21946, 38688, 41717, 33679, 50953, 3949, 29227	yes
903	69735, 37527, 40898, 45244, 40167, 73861, 29870, 39884, 52274, 18909, 51551, 2903, 63305, 26533, 17930, 71656, 47110, 25689, 22783, 70344, 4047, 12057, 37608, 41322, 65918, 56541, 29177, 38012, 6526, 74092, 67221, 32345, 40457, 50550, 71789, 54591, 33515, 39856, 26410	yes
904	56664, 71052, 67563, 39586, 1216, 45083, 39907, 62467, 47869, 33859, 37348, 4744, 48575, 8179, 33067, 51496, 14068, 69362, 22523, 45888, 26130, 27640, 27416, 1779, 32301, 37550, 2674, 13103, 53677, 15040, 36740, 33797, 44949, 27440, 28413, 59353, 60902, 19726	yes
905	34524, 72016, 72334, 55062, 23034, 48674, 17908, 9985, 4379, 72065, 8000, 62022, 5745, 20999, 26174, 5847, 21514, 4682, 58806, 56972, 37782, 2906, 52110, 67067, 54673, 13231, 36371, 73687, 35406, 50452, 18723, 33793, 70067, 60082, 15024, 31297, 2761, 24641, 31816	yes
906	2043, 45223, 19118, 21246, 50342, 69014, 23391, 2413, 66142, 49509, 48951, 30667, 27037, 56540, 45359, 2621, 31863, 5672, 41786, 20399, 61184, 28563, 17378, 41664, 4931, 55692, 4487, 37066, 1383, 73306, 11779, 49708, 57828, 38346, 931, 48278, 8847	yes
907	12423, 9340, 27835, 8282, 11479, 46731, 48224, 19542, 14835, 45851, 71740, 53114, 43724, 37956, 61711, 47818, 11027, 25020, 2733, 250, 70180, 41567, 51805, 22531, 945, 38801, 62644, 23419, 34915, 1584, 31236, 63197, 47697, 10846, 72589, 33716	yes
908	8240, 29357, 30686, 763, 48939, 66214, 38502, 7368, 12724, 61789, 33226, 42626, 35957, 2004, 72942, 20897, 19228, 31310, 64600, 961, 47038, 12128, 43139, 23661, 12721, 29880, 43919, 29044, 64690, 66853, 73731, 23136, 57103, 68987, 55316, 63209, 20282, 23460, 11669, 41366	yes
909	45527, 43319, 73824, 56513, 29026, 73867, 64797, 44377, 5655, 15586, 24166, 55183, 4228, 18096, 33217, 42617, 30193, 7574, 16931, 15875, 28389, 56329, 9187, 14534, 46344, 8147, 3123, 9718, 19212, 2197, 43834, 38866, 41183, 41085, 27180, 17847	yes
910	44607, 9413, 45338, 48254, 22115, 18042, 40442, 4455, 51637, 11150, 63445, 13915, 61901, 26178, 3434, 37742, 32880, 26268, 37704, 22643, 48400, 17923, 39799, 51413, 27686, 55322, 3139, 57017, 52448, 50929, 16741, 24248, 68232, 5193, 20147, 50084, 39717, 8327, 53994	yes
911	42222, 67774, 30275, 13994, 2345, 37939, 863, 23719, 1802, 73578, 34494, 51070, 64575, 49682, 49994, 14980, 44190, 53540, 9778, 20142, 14668, 6786, 33255, 35166, 62184, 66447, 27167, 13417, 34927, 20969, 74209, 56086, 33493, 923, 39501, 29722, 67265, 50869	yes
912	40368, 68244, 67821, 8285, 2038, 14101, 3018, 16745, 38320, 71187, 68580, 73760, 74204, 46839, 1360, 28898, 57614, 13783, 26726, 43178, 50247, 38817, 22093, 15754, 24644, 59541, 46799, 58689, 52721, 12083, 28594, 39969, 53847, 4312, 37706, 10235	yes
913	52913, 9563, 17083, 1314, 67364, 68738, 46300, 64244, 5445, 4547, 16704, 43811, 47803, 18798, 56720, 61636, 37838, 32215, 22865, 28081, 22316, 32874, 52967, 63277, 53933, 14784, 7224, 1377, 29186, 48467, 64586, 25751, 13810, 38507, 52973, 57049, 70372, 34396, 10838	yes
914	37843, 11050, 69337, 47684, 54427, 43292, 38458, 50415, 58528, 20363, 33033, 23274, 20276, 69322, 35131, 36582, 27613, 7101, 47579, 67979, 52012, 64851, 61372, 33300, 10818, 55706, 71460, 46915, 17782, 36941, 63064, 50204, 52185, 49622, 58001, 10184, 52477, 43663, 58941	yes
915	12603, 62952, 39422, 36819, 74001, 56241, 62391, 68274, 67554, 37347, 38732, 11707, 59613, 60432, 31309, 62114, 46969, 18696, 32537, 19642, 10411, 55143, 59348, 72662, 13336, 51785, 35744, 73755, 52755, 56919, 3763, 34108, 65751, 46780, 3304, 71177, 65559, 24060, 12338	yes
916	42455, 18521, 41268, 11809, 60313, 18221, 6188, 36579, 74431, 18883, 8664, 49181, 3406, 30180, 37746, 59656, 28222, 61191, 11749, 50135, 40292, 34994, 27572, 23575, 62390, 29340, 31892, 9905, 8937, 66886, 6851, 46986, 46896, 25849, 50338	yes
917	69421, 9993, 53561, 21787, 35932, 62009, 25308, 42015, 3449, 41261, 22272, 24409, 3622, 22849, 5209, 16864, 23862, 30914, 72918, 53877, 72192, 21641, 70387, 33273, 42265, 53710, 7477, 61108, 37813, 47438, 22031, 65196, 28407, 30092, 58101, 4251, 21289, 61036, 3441	yes
918	57160, 4642, 56015, 18274, 26737, 73452, 15313, 22448, 15557, 48326, 6969, 44890, 42380, 14261, 3413, 36241, 38176, 69035, 27617, 24911, 40005, 52069, 40726, 23461, 40722, 7128, 67088, 60556, 3681, 26249, 55498, 59927, 8093, 61968, 20256, 8976, 39736, 46724, 32159	yes
919	60084, 46552, 40699, 18493, 13051, 58115, 28665, 27029, 44008, 55425, 36854, 13328, 31582, 44654, 40073, 42697, 42402, 39269, 32695, 62730, 43728, 4348, 48064, 34948, 43561, 61895, 49365, 50979, 21072, 64917, 57156, 3251, 26940, 52000, 69600	yes
920	68339, 5444, 25481, 10496, 14314, 11164, 44133, 11258, 29190, 66883, 52424, 33559, 13114, 28451, 65931, 37005, 13612, 1616, 27197, 26982, 32335, 38765, 66960, 72410, 69094, 22971, 26596, 20090, 57790, 5706, 24096, 21177, 14469, 51405, 36047, 63484	yes
921	6983, 36876, 46231, 54995, 45094, 2317, 70651, 55808, 25731, 24254, 64294, 49017, 45900, 15977, 37729, 38698, 22460, 29771, 23333, 43383, 52825, 6273, 533, 19476, 64450, 6067, 8560, 54978, 17667, 51536, 9838, 68688, 56751, 44535, 69771, 36845, 52093	yes
922	14645, 606, 17175, 57876, 19138, 7116, 15859, 29963, 1880, 68815, 41139, 24574, 69048, 54970, 39655, 44647, 58422, 40137, 64086, 39432, 28032, 26721, 25306, 39223, 63798, 25698, 32568, 29825, 65690, 26882, 33204, 30670, 10894, 31157, 67478, 71468, 13529, 48534	yes
923	60911, 8775, 23501, 2512, 19911, 65859, 5090, 42949, 28028, 12545, 49905, 48889, 896, 37759, 67739, 58461, 24712, 13465, 12413, 57491, 17524, 30680, 1398, 47397, 5190, 6020, 66228, 28877, 17953, 41761, 29255, 56900, 36704, 32374, 15902, 3872, 50466, 5883, 3856, 17374	yes
924	72246, 66391, 71227, 54688, 18334, 37522, 59832, 74436, 22170, 36175, 2725, 14244, 30008, 29268, 10160, 15831, 72519, 66465, 61107, 18455, 15205, 8791, 31095, 9485, 21936, 61609, 54285, 17856, 62278, 44919, 56630, 50606, 14954, 22688, 20708, 41405	yes
925	53641, 73432, 59338, 33546, 41898, 30925, 55861, 54117, 53644, 27288, 14621, 63984, 30973, 64994, 63637, 12666, 37960, 717, 31885, 46756, 61100, 35462, 26649, 36307, 64817, 60780, 18997, 59207, 46813, 44619, 24458, 48199, 50097, 18668, 33019	yes
926	9382, 72109, 21947, 43177, 21767, 37235, 36945, 57560, 72189, 25368, 15916, 6799, 35425, 69425, 15759, 34309, 36851, 20626, 50846, 25487, 39560, 51743, 27019, 3759, 74659, 21798, 58731, 41065, 18416, 16520, 31893, 74326, 65662, 25258, 37770	yes
927	64497, 72179, 27207, 29649, 5873, 52311, 25131, 10324, 70859, 9585, 23627, 39424, 41946, 6817, 37249, 42178, 63639, 52557, 18949, 37829, 22626, 23562, 39477, 60787, 31416, 32505, 40344, 5676, 17621, 20605, 38148, 69260, 27465, 49466, 14277, 70951, 25248, 61404	yes
928	60520, 4803, 56230, 74039, 72273, 49032, 20197, 73534, 8344, 17746, 67316, 1585, 43083, 18181, 42750, 69016, 32753, 19581, 44124, 26011, 32642, 20908, 6342, 56410, 60165, 59965, 31653, 21182, 28184, 51239, 37955, 23985, 74179, 64356, 44502, 12500, 57940, 73767	yes
929	45591, 18199, 54330, 3022, 34993, 71215, 68963, 30790, 67011, 71375, 28291, 45262, 4793, 6500, 62971, 20981, 57507, 9138, 54734, 14571, 25912, 63094, 11720, 48226, 23062, 66270, 52700, 60874, 25646, 9907, 17844, 36071, 52814, 31633, 5754, 27980, 36874, 50304, 56557, 45682	yes
930	63911, 51921, 8981, 13232, 53689, 64689, 7631, 59095, 38333, 30409, 799, 850, 11406, 130, 66227, 11599, 22305, 8335, 38603, 57452, 61364, 3166, 42561, 57567, 30464, 23684, 14515, 46370, 44451, 13458, 69594, 33414, 63237, 64729, 63737, 59987, 13354, 67050, 6666	yes
931	73672, 9632, 7796, 29644, 7184, 13504, 44824, 57617, 3186, 30346, 33588, 20360, 65331, 69510, 71618, 652, 12116, 18896, 17354, 29285, 58200, 19686, 29282, 27102, 36038, 55871, 30660, 65523, 53384, 4632, 44375, 38891, 58228, 3984, 60336, 30211, 37312	yes
932	40581, 50574, 71169, 53796, 16299, 6277, 31858, 47550, 38038, 61512, 66873, 15998, 33148, 43102, 35748, 28470, 10789, 3583, 54053, 5176, 9439, 41732, 29559, 65810, 12921, 62, 2656, 129, 48914, 31637, 35400, 49961, 27501, 65499, 21560	yes
933	70655, 45515, 41555, 56831, 30588, 4906, 2308, 21308, 18688, 48025, 46854, 47313, 64239, 44441, 20631, 55094, 38261, 30388, 20490, 59115, 70285, 40896, 30740, 19764, 66231, 31283, 65223, 1210, 46566, 43486, 9171, 19947, 64703, 56988, 71435, 60225, 37963, 60623	yes
934	43866, 40787, 73973, 21840, 41204, 27855, 16618, 28020, 34985, 73527, 27255, 52122, 14414, 56788, 53446, 19199, 33002, 19060, 69954, 44293, 2268, 9262, 23634, 68565, 46084, 9426, 53370, 6011, 69221, 14188, 43958, 5388, 10005, 42877, 10011, 36324, 55759	yes
935	8576, 3727, 41496, 58136, 35206, 12880, 35443, 29206, 62652, 10660, 10244, 67671, 54105, 47307, 8698, 15636, 38447, 44486, 31524, 59829, 49430, 10454, 62105, 13476, 40372, 4952, 57341, 72188, 49849, 61907, 58980, 50005, 43547, 41676, 3346, 21802	yes
936	10409, 47147, 4252, 39037, 57504, 49373, 26127, 24100, 27611, 27406, 7465, 56681, 61937, 16919, 14124, 1653, 2634, 17596, 46816, 44698, 17425, 5020, 23175, 19912, 45481, 38347, 15320, 34236, 68047, 5545, 8059, 36093, 65839, 10214, 6935, 6673, 61612, 29872, 9443	yes
937	47083, 62780, 34146, 70763, 52027, 14062, 34544, 48758, 12053, 10166, 61240, 17653, 36658, 17014, 36048, 10384, 13974, 49714, 12779, 48831, 42974, 1321, 38667, 61924, 42488, 14480, 66784, 31457, 43694, 24585, 22774, 37751, 63148, 50023, 26904	yes
938	47820, 42926, 24634, 54547, 73963, 44028, 41018, 55942, 33571, 62396, 67394, 20702, 45806, 72149, 3861, 12551, 61769, 42255, 22018, 6598, 27601, 11339, 32278, 67026, 40462, 47968, 18749, 66239, 24961, 32548, 19074, 48463, 23519, 7486, 12619, 12913, 48853, 26472, 56224, 15763	yes
939	63009, 62129, 72341, 55372, 47090, 37031, 2862, 56908, 44160, 18799, 1931, 26500, 26928, 44879, 29555, 43612, 6676, 49307, 34480, 6538, 11091, 48652, 11705, 17900, 12360, 60493, 31622, 37971, 41930, 2077, 40467, 32638, 49653, 57745, 42028, 4195, 40357, 68544, 67524, 35804	yes
940	57897, 55505, 63935, 62727, 49893, 66610, 56986, 7605, 21525, 20732, 48245, 2811, 24884, 67451, 72772, 50648, 2861, 72472, 12665, 54791, 56397, 74596, 58671, 23089, 50094, 47959, 4137, 41954, 61556, 2298, 45068, 27375, 39589, 52474, 36517, 13390, 56784	yes
941	21793, 13369, 17699, 26028, 34527, 62094, 41875, 27032, 57132, 18487, 47945, 16880, 20724, 12907, 15258, 37064, 51186, 43448, 4298, 43456, 65968, 35103, 3292, 7835, 9765, 73517, 41210, 54509, 46391, 19844, 69788, 24571, 4805, 70536, 30238, 12527, 65014, 58823, 6458, 17910	yes
942	5957, 34355, 57165, 11780, 314, 69875, 66264, 48540, 58044, 53120, 43362, 42599, 11265, 46671, 27490, 34350, 64008, 66671, 3895, 7403, 49294, 65565, 4103, 42122, 17920, 26435, 42198, 39266, 44978, 232, 27977, 53132, 38721, 32309, 70564, 35895, 47463, 10313	yes
943	11015, 63893, 68018, 20488, 48017, 49762, 43714, 65930, 72796, 13367, 56186, 65293, 52426, 22236, 12239, 41994, 55768, 58403, 59906, 50946, 66366, 16993, 13760, 28905, 3552, 57553, 71049, 38465, 47775, 11466, 4557, 73017, 12300, 16053, 70612, 62376, 4783	yes
944	64088, 12906, 31586, 10283, 31349, 63123, 26603, 61398, 60674, 10596, 38373, 34409, 24514, 4901, 3219, 18382, 68055, 68170, 31121, 41225, 11445, 71426, 40152, 15074, 51776, 54165, 16153, 52961, 31025, 38862, 10680, 62774, 48024, 39520, 36040, 30348, 1324, 42381	yes
945	65466, 4968, 12033, 37058, 61831, 26047, 29236, 58014, 49081, 42940, 7955, 2856, 18942, 39992, 49901, 33727, 69769, 66159, 73051, 48730, 42042, 32267, 62584, 22372, 59083, 70600, 31961, 22192, 7735, 13279, 39833, 70215, 47285, 60325, 6911, 66140	yes
946	9459, 54777, 40388, 68923, 67191, 4462, 70184, 3365, 34958, 6961, 25997, 28331, 38588, 1172, 44782, 5331, 34603, 8516, 47529, 73179, 11325, 47473, 41958, 64934, 61448, 21841, 16566, 7967, 6779, 60204, 42509, 13345, 71014, 2516, 61557	yes
947	43143, 72832, 29590, 48544, 2388, 27550, 775, 68158, 1127, 72236, 48980, 73841, 4468, 51563, 49264, 73798, 42360, 54298, 67280, 19766, 64028, 12616, 53566, 70631, 16597, 58121, 36325, 67893, 32221, 8671, 49663, 67986, 39790, 10555, 26684, 55625, 24460, 18356	yes
948	52515, 62298, 4676, 54563, 62063, 19091, 5491, 2188, 16514, 38952, 37433, 50439, 68035, 68821, 13008, 18848, 35347, 20818, 66093, 62093, 62041, 21865, 48930, 9075, 33401, 15034, 16365, 42494, 39081, 27046, 30723, 15223, 57303, 64311, 5955, 16092	yes
949	8380, 36995, 15674, 47943, 5374, 65891, 34913, 27647, 22826, 45395, 31226, 69965, 58089, 1508, 13398, 69884, 48180, 66000, 18191, 457, 41943, 28955, 47306, 41534, 560, 21801, 21698, 70833, 36595, 55258, 8650, 35284, 36442, 37799, 71923	yes
950	29947, 65051, 44015, 70545, 3636, 55937, 51825, 38206, 21490, 5770, 62402, 59270, 62967, 38133, 19688, 12479, 34654, 23863, 28169, 43763, 8354, 11818, 44545, 69378, 9550, 21566, 24866, 13043, 3776, 44887, 28234, 67003, 10070, 63161, 52018, 23851, 70617	yes
951	35242, 34228, 66442, 8705, 57825, 35582, 19942, 18756, 61614, 71990, 66810, 65291, 51862, 37468, 2876, 16647, 51567, 74386, 65867, 29134, 50919, 39495, 65544, 68109, 16163, 6264, 4273, 57235, 41231, 4628, 35882, 72991, 25705, 59574, 32128, 37303, 34509	yes
952	61972, 14086, 56420, 52382, 56709, 9795, 58763, 50284, 6378, 44497, 7781, 71761, 20172, 17093, 28401, 20932, 11921, 48434, 12152, 4403, 65647, 41104, 25743, 36349, 16959, 16274, 46118, 18354, 36179, 14753, 40245, 1981, 11281, 53060, 72050, 10057	yes
953	56917, 49985, 44209, 6192, 44275, 66507, 1812, 71720, 73946, 25091, 37009, 20141, 68744, 16383, 74270, 9044, 19069, 34178, 66350, 26090, 43120, 3325, 5879, 33075, 24944, 8392, 62488, 73642, 30544, 38003, 38758, 30724, 67694, 22958, 21874, 2328	yes
954	24870, 61083, 12885, 6895, 11354, 38325, 37887, 11083, 59247, 62502, 74263, 11211, 31897, 59738, 7870, 38979, 60955, 32408, 70462, 5562, 19962, 61408, 35979, 54049, 5512, 4244, 19882, 27075, 63260, 17127, 15025, 17357, 13036, 58623, 27880, 22995	yes
955	39061, 27689, 7653, 3487, 36345, 42857, 6803, 61277, 30220, 54683, 57499, 71754, 70983, 67072, 27596, 33362, 31144, 65598, 5986, 47264, 2700, 63937, 51711, 51747, 72583, 41084, 24516, 68899, 28866, 73483, 36075, 14910, 29688, 18252, 47200, 39628, 16632, 40760	yes
956	1635, 9490, 34625, 54224, 1555, 53379, 54946, 54598, 38335, 31156, 40606, 28694, 35367, 5543, 50841, 55859, 20907, 498, 32814, 53576, 14034, 24804, 36186, 16823, 30782, 14309, 33721, 67765, 21662, 42597, 54580, 69271, 46803, 13916, 46177, 35227, 56588	yes
957	13324, 9250, 29323, 19456, 11597, 20040, 31448, 70789, 39018, 70836, 64256, 36402, 46004, 8799, 51109, 19900, 41579, 61682, 5210, 24047, 36263, 54923, 35780, 35686, 61718, 57284, 50505, 59655, 18017, 8490, 3999, 40098, 21621, 1429, 12497, 10026, 66834	yes
958	21241, 18938, 72537, 17389, 30715, 48722, 60444, 59349, 50743, 2658, 65920, 50295, 42384, 14685, 3143, 73154, 33216, 14081, 772, 19255, 37666, 28041, 53248, 36987, 6896, 46829, 34265, 41448, 42695, 63684, 17750, 26116, 45641, 29538, 73454, 34708, 41404, 6452, 63770	yes
959	39446, 7448, 46892, 64905, 70338, 67227, 74445, 18686, 41841, 36300, 64276, 73361, 776, 34084, 63607, 46152, 24598, 37671, 13563, 2385, 48215, 64416, 27413, 33304, 44507, 20076, 8455, 22343, 30324, 6215, 68422, 15289, 21951, 25852, 18744, 35474	yes
960	50114, 64381, 42478, 12668, 24013, 44808, 34966, 10243, 38928, 4122, 65118, 51838, 21650, 69188, 12147, 14232, 74054, 18742, 65952, 69640, 71887, 45740, 1624, 21190, 1304, 58802, 6060, 27757, 66574, 67988, 48362, 70746, 40524, 7950, 30015, 70043, 21952, 34069	yes
961	74203, 57134, 33483, 53089, 60488, 58218, 12624, 43505, 67581, 28711, 70139, 40257, 4664, 5312, 33462, 71697, 51280, 28116, 65658, 34496, 39050, 27499, 42120, 22089, 67628, 53587, 58777, 16144, 7998, 10331, 47921, 23053, 53555, 7099, 46905, 8713, 18933, 52529, 54492, 14236	yes
962	13022, 29605, 1938, 71955, 67393, 4027, 18864, 38748, 29332, 40925, 13980, 64776, 41731, 45263, 20568, 29931, 22217, 63247, 56770, 30884, 61838, 48216, 27418, 30650, 27160, 16687, 31106, 39185, 11981, 15136, 60103, 21774, 66546, 68554, 116, 21588, 22946	yes
963	41551, 28108, 16776, 39367, 57293, 9104, 66036, 61407, 43388, 71424, 22933, 32714, 74558, 9668, 47787, 15105, 6926, 47355, 45089, 62120, 10499, 51063, 49709, 59438, 4572, 48622, 32018, 23245, 7223, 59459, 43822, 18411, 50458, 15453, 61430, 43740, 47030, 55317, 33267	yes
964	31675, 854, 35437, 51014, 44179, 21925, 2442, 11957, 30557, 38187, 58196, 601, 40295, 26728, 53270, 24095, 15419, 56554, 23345, 16778, 51962, 65498, 55088, 39305, 67455, 41379, 46139, 67208, 17995, 57296, 26969, 13332, 40938, 56499, 670, 9296	yes
965	63967, 51723, 34807, 49488, 12541, 59235, 8914, 31178, 34356, 19992, 50406, 35985, 38868, 8484, 46350, 47715, 28933, 23459, 63002, 30443, 8509, 59572, 56024, 12244, 70698, 60833, 27281, 58860, 13250, 15906, 36121, 35878, 39045, 64375, 3447, 66178, 66528, 46303, 5970	yes
966	59916, 69253, 42499, 39753, 20214, 14486, 47854, 74184, 35993, 68482, 39461, 44992, 4165, 57676, 55909, 27819, 4395, 48865, 62060, 26819, 18127, 60446, 6095, 16311, 7366, 56853, 41413, 71267, 35066, 18126, 59501, 54026, 18484, 32851, 73166, 64395, 10603, 23598, 7105, 36991	yes
967	57874, 225, 39680, 41838, 29470, 5467, 54948, 46412, 61535, 61138, 62912, 60448, 58933, 23002, 4741, 5661, 13724, 11332, 34991, 58138, 7754, 61641, 55080, 60163, 73919, 43616, 70233, 33349, 8613, 36929, 7284, 28232, 69605, 269, 39749, 68146	yes
968	53531, 2946, 47618, 39387, 44339, 35315, 58282, 300, 17571, 73564, 57902, 56911, 37518, 59473, 20476, 31322, 34200, 13483, 7961, 29416, 51784, 41477, 49404, 34306, 27924, 70822, 47656, 23222, 37359, 8984, 12512, 55508, 30829, 25190, 66559, 37670, 19702	yes
969	64864, 26655, 62134, 55012, 74015, 6833, 51588, 1272, 17395, 67740, 63405, 69460, 825, 59595, 5459, 30713, 27329, 28581, 26216, 29072, 41095, 21140, 9065, 36528, 5948, 63861, 15882, 8024, 53599, 63866, 59964, 3464, 56694, 2249, 5173	yes
970	45539, 23988, 29341, 21927, 41456, 16536, 50277, 46976, 10307, 57871, 74490, 60943, 3144, 6397, 9590, 17317, 34029, 45667, 31522, 26224, 72812, 5448, 59928, 4510, 52650, 57963, 11308, 17886, 55305, 68510, 62363, 32746, 72753, 55582, 54317	yes
971	29244, 5157, 31001, 15670, 36411, 57766, 61579, 10506, 68606, 545, 21214, 13265, 10783, 15955, 15963, 20887, 56511, 20525, 21476, 64796, 60349, 69330, 30018, 43283, 48059, 18720, 40756, 2338, 27546, 68962, 19344, 25432, 62021, 29864, 33476, 13607, 40063, 66437	yes
972	7506, 48455, 27251, 51868, 58035, 13029, 7158, 23428, 59190, 51782, 5396, 34949, 19327, 580, 72574, 48481, 2600, 70767, 74188, 52999, 53716, 20158, 64283, 5768, 61287, 57800, 22583, 2704, 26850, 11733, 57674, 29598, 23349, 29846, 64608, 59022	yes
973	27524, 62378, 4018, 32099, 45676, 12327, 49832, 57170, 54395, 22184, 18948, 71025, 11093, 47980, 67820, 12376, 25486, 70188, 16850, 25040, 14344, 42272, 64878, 18255, 33105, 10792, 25798, 5895, 35667, 33870, 24141, 42107, 73641, 24238, 40157, 21564, 69054, 12392, 3795, 44621	yes
974	12078, 59357, 30812, 43989, 68315, 62840, 45948, 74664, 14249, 54482, 37393, 54785, 52048, 35287, 72491, 37595, 21040, 70521, 45428, 64715, 22886, 13191, 40219, 12954, 40565, 46600, 68150, 47250, 54318, 17037, 19866, 51607, 59167, 51167, 47719, 5186	yes
975	11266, 1759, 60007, 38171, 20067, 25875, 65869, 35203, 50754, 3665, 64092, 22633, 73853, 25383, 33927, 29376, 51889, 31169, 19462, 22118, 46253, 45462, 33232, 28590, 34271, 49149, 63114, 36426, 71552, 5135, 22940, 66613, 72860, 14449, 20753	yes
976	27542, 33397, 53339, 60076, 66104, 38297, 11424, 39926, 13838, 37609, 15458, 6658, 39265, 55500, 18119, 11537, 2527, 34957, 23911, 1462, 69200, 74167, 59607, 916, 52145, 47991, 15849, 53732, 39720, 9597, 16273, 27554, 28459, 48572, 17744	yes
977	46472, 73691, 20273, 21754, 12967, 35297, 12310, 54011, 1557, 39622, 41608, 68347, 63741, 15246, 33677, 44931, 38609, 66082, 43646, 34312, 71412, 52262, 60483, 69660, 31546, 28595, 16565, 66662, 59645, 38875, 21974, 36157, 61229, 29711, 27989, 34127, 17058	yes
978	37788, 57033, 37123, 50761, 10883, 22408, 31843, 4021, 26648, 14038, 5297, 64400, 24676, 4359, 70539, 13404, 43719, 3122, 32622, 14702, 37992, 2179, 60868, 51966, 28042, 4411, 25414, 19209, 39114, 42629, 62037, 28697, 53424, 9736, 70566, 61163, 68777, 34443	yes
979	73879, 17664, 62856, 7762, 73714, 58018, 40486, 32967, 4585, 51029, 63222, 31268, 26220, 34000, 39853, 68791, 16592, 43462, 13200, 51415, 14568, 26937, 61780, 17502, 38390, 30430, 10902, 31924, 34946, 53598, 23255, 1711, 2879, 3209, 5844, 44240	yes
980	37804, 10365, 69967, 15851, 9926, 28382, 67286, 34342, 15647, 54477, 66176, 69714, 30855, 45813, 71493, 51376, 41150, 59667, 856, 36274, 22405, 8975, 72900, 19106, 42136, 13898, 349, 40376, 50502, 66709, 18619, 41093, 54962, 18525, 63945, 53979, 61081, 1171	yes
981	23290, 66759, 65433, 17806, 67476, 17096, 37897, 72045, 65614, 20248, 20613, 40796, 66716, 33746, 1475, 16075, 41260, 55257, 18630, 36251, 39688, 35253, 42805, 3483, 65928, 3821, 24139, 60358, 25076, 35283, 72421, 67051, 67995, 4889, 24629	yes
982	61996, 69392, 19548, 27656, 56255, 20898, 25561, 17578, 24974, 38645, 53235, 63433, 70623, 40767, 20953, 68838, 13647, 45981, 5587, 45857, 74369, 46194, 39369, 8923, 25223, 19468, 48325, 64554, 68141, 54191, 5274, 10746, 24621, 28614, 67930, 52240, 51763, 63285, 62266	yes
983	49674, 22457, 59881, 48866, 62258, 30677, 11861, 44655, 33262, 61041, 24365, 73242, 459, 3717, 37456, 56245, 3317, 31689, 20079, 73167, 25639, 72563, 47738, 33074, 39474, 20310, 53288, 70550, 5221, 25655, 8450, 19120, 74173, 70137, 13561	yes
984	6900, 48891, 7163, 50173, 47284, 61232, 64184, 11540, 57639, 64058, 14135, 32755, 50810, 43112, 16380, 37153, 14076, 45451, 54374, 53843, 36017, 33762, 47537, 59113, 64426, 37288, 25836, 41002, 35887, 42657, 8361, 44844, 11248, 47464, 9023, 62462	yes
985	8797, 60227, 64801, 41633, 68234, 32960, 31631, 4229, 69354, 52384, 46102, 18439, 31089, 73590, 938, 27115, 54814, 25206, 45967, 68176, 50348, 9505, 28481, 5541, 9858, 67583, 12930, 27265, 24757, 4506, 56563, 59417, 35590, 46957, 54470	yes
986	33697, 19988, 49025, 10614, 43429, 31133, 20407, 50474, 40619, 10220, 37213, 9001, 63574, 54438, 52904, 18331, 7619, 53737, 58232, 61961, 15474, 21014, 53458, 37470, 21091, 23541, 39851, 61379, 25167, 8522, 72838, 10623, 59869, 45466, 10298, 17316, 4583, 62944, 38340, 40170	yes
987	43487, 39091, 27700, 3172, 67834, 14323, 5280, 62136, 35909, 68126, 19140, 11835, 64756, 1281, 46630, 46851, 42809, 37440, 57098, 30874, 40957, 69794, 68218, 33819, 13078, 1753, 59026, 64897, 52798, 32009, 27153, 31906, 62935, 65685, 117, 15578, 8117, 21026, 19820, 15545	yes
988	71089, 73232, 37290, 61903, 21325, 47629, 47709, 12818, 62686, 45109, 32490, 5367, 58939, 19185, 53594, 30393, 17612, 31837, 26240, 20890, 65177, 16554, 24807, 19306, 57496, 8273, 46607, 556, 24244, 31062, 69340, 5334, 66979, 60694, 58642, 69964	yes
989	20241, 20838, 4508, 4737, 3720, 42757, 61241, 31244, 1618, 41980, 57663, 30370, 27456, 9995, 61126, 55306, 21542, 65385, 49433, 12920, 63092, 70853, 9282, 49037, 36084, 48755, 1619, 6229, 69315, 63815, 7471, 49214, 38155, 24193, 39845, 48635	yes
990	56229, 56687, 34071, 63346, 28018, 62433, 58513, 67439, 6586, 39384, 11942, 30702, 48501, 23885, 33895, 49399, 26547, 11051, 55563, 36988, 60397, 40714, 41804, 23670, 58953, 13765, 10864, 44413, 10718, 55813, 21351, 22370, 21992, 59238, 22512, 15459, 32228, 32977	yes
991	49315, 11110, 2404, 39911, 51873, 68143, 19649, 55345, 28896, 3243, 29973, 18094, 25572, 24098, 30728, 1499, 32164, 57328, 62845, 37894, 32887, 6370, 74135, 48793, 43889, 59014, 185, 61880, 24464, 15318, 893, 14306, 28884, 65504, 36690, 73676, 57213	yes
992	17898, 35038, 34150, 58578, 26591, 53872, 67422, 10827, 72018, 22793, 12223, 49964, 44876, 5997, 69290, 5264, 1126, 21061, 51216, 41865, 34932, 3991, 60641, 15005, 67178, 74651, 5300, 2362, 28090, 48118, 22782, 38646, 22251, 63068, 54277, 69527, 12647, 68281, 7165, 31762	yes
993	14260, 11549, 16349, 44135, 8610, 54042, 48641, 66469, 17376, 71081, 67290, 53395, 7118, 28623, 3363, 1097, 4702, 22322, 51024, 14811, 50902, 23469, 26320, 11900, 54721, 22938, 986, 57008, 30112, 42536, 22719, 17172, 26860, 61244, 86, 8953, 12469, 13784	yes
994	34317, 7767, 46698, 67001, 51596, 69645, 27328, 24908, 72147, 9608, 20581, 21903, 41103, 70605, 26156, 1834, 14341, 16659, 1467, 63478, 17068, 32153, 30576, 20795, 57850, 67885, 21008, 63243, 20299, 41154, 59172, 20127, 26485, 7588, 3426, 39871	yes
995	1228, 41479, 16926, 57505, 28239, 4490, 17859, 14641, 55288, 56438, 14629, 959, 58675, 31835, 26140, 11838, 58013, 70727, 53524, 10140, 42540, 73122, 69578, 67232, 26376, 1396, 3714, 3310, 1329, 40477, 51175, 37441, 18054, 62069, 14069, 70230, 45459, 14700, 70985, 74268	yes
996	989, 43067, 6026, 45069, 53801, 35964, 17916, 73164, 21176, 21879, 28005, 54301, 62185, 36489, 53808, 69254, 60219, 43325, 37319, 21470, 37502, 42026, 52664, 3126, 23165, 73775, 56797, 45635, 69458, 50303, 34788, 43070, 2431, 37093, 60055, 33634, 47483, 61134, 22441	yes
997	3154, 68375, 9493, 65501, 46958, 62049, 41214, 47151, 59844, 61411, 55815, 47802, 36173, 54031, 18837, 54121, 65343, 68479, 44934, 51616, 57858, 19980, 62243, 58437, 43451, 16374, 26931, 3319, 53211, 52543, 22602, 69155, 69801, 10659, 35935	yes
998	1617, 189, 58821, 3438, 68196, 67155, 72212, 72486, 53882, 62420, 35049, 39869, 13533, 11793, 41392, 19240, 18865, 41895, 20583, 19194, 7577, 26774, 10610, 31882, 1574, 57440, 55900, 5862, 60504, 43893, 3040, 49358, 9215, 58705, 44633, 44333, 53754, 13963, 38831, 13651	yes
999	31484, 69984, 61960, 50969, 44100, 23351, 21625, 21920, 36399, 70807, 35769, 64609, 10524, 68416, 36962, 56094, 2018, 48791, 46732, 42673, 6334, 53412, 36259, 47249, 53184, 62195, 6761, 41320, 62052, 44582, 26414, 7240, 26312, 43767, 30132, 30455, 62065	yes
