# Supplementary material
Source: ML conference proceedings conference paper supplement (https://openreview.net/forum?id=MgXrLxjDed)

## Relation-aware Decoupling

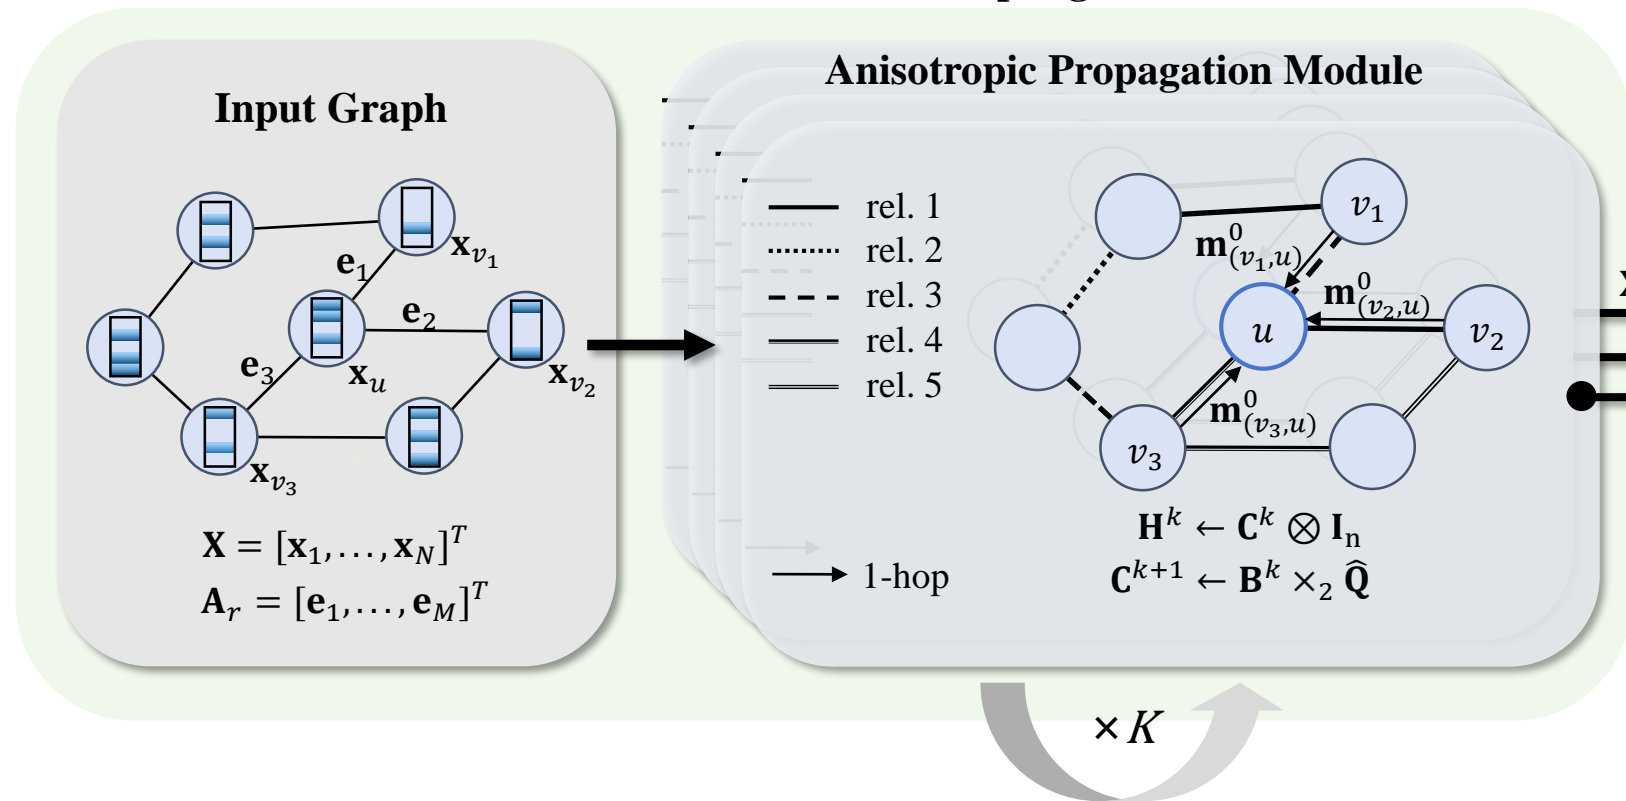

## Feature Mapping

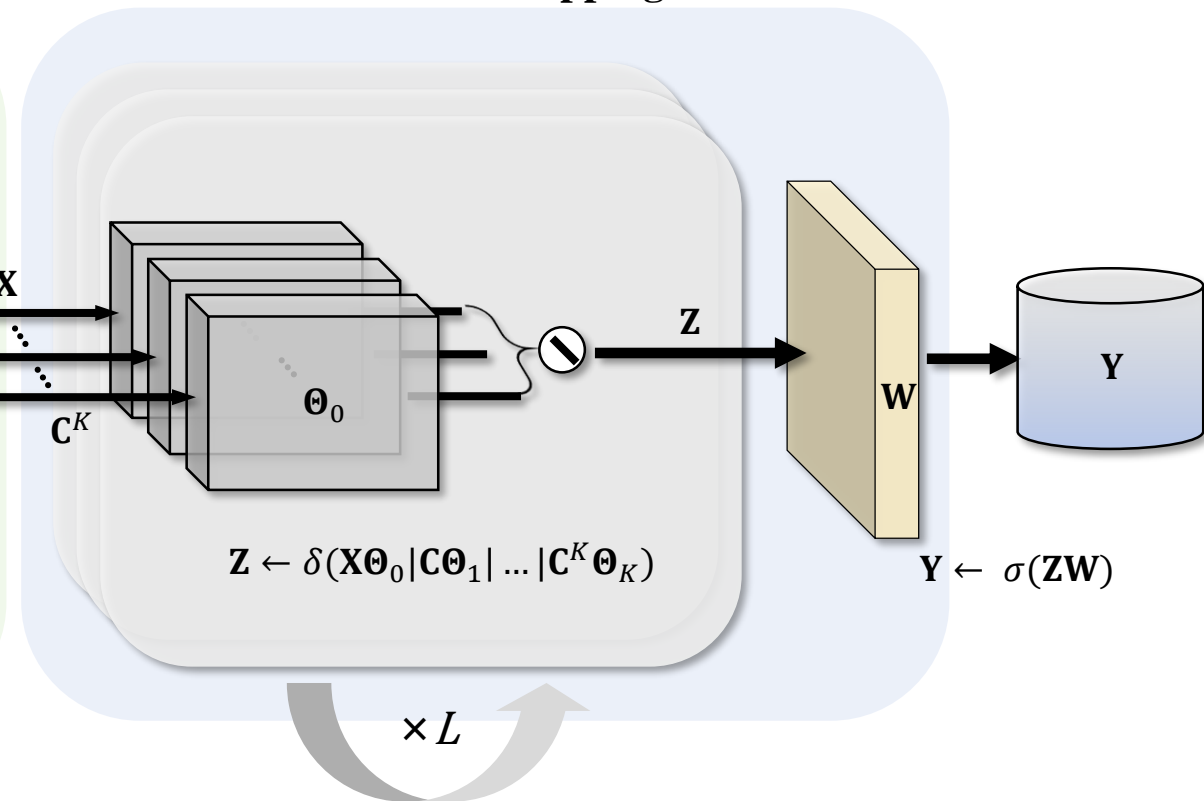

Supplement: supplementary_material [file HGD.pdf › UniHG-main/figs/HGD.pdf]
